# Supplementary material for: Activating NRF2E79Q mutation alters the differentiation of human non-small cell lung cancer
Source: Research Square preprint supplement (doi:10.21203/rs.3.rs-6606334/v1), 2025-05-15
Supplement: Supplementary file 1 [file 7a3b167f2bab7138df8cfa9d.pdf]

## Supplementary Information

### Activating NRF2<sup>E79Q</sup> mutation alters the differentiation of human non-small cell lung cancer

Samira H. Hamad<sup>1,2,3,4,5\*</sup>, Hansa Joshi<sup>2</sup>, T. Hess<sup>2</sup>, Stuart R Jefferys<sup>4</sup>, Zena Saleh<sup>2</sup>, Rani S. Sellers<sup>4,6</sup>, Gord Zhu<sup>1,2</sup>, Travis Shrank<sup>4,7</sup>, Rayvon T. Moore<sup>4</sup>, David Corcoran<sup>4,8,9</sup>, Jeremy M. Simon<sup>4,8,9</sup>, Francis R Spitz<sup>1,2,3</sup>, David Shersher<sup>1,2,3</sup>, Michael B. Major<sup>4,10</sup>, and Bernard E. Weissman<sup>4,5,6</sup>

<sup>1</sup>Cooper Medical School of Rowan University, Surgery Department, Camden, New Jersey, United States.

<sup>2</sup>Cooper University Health Care, Surgery Department, Camden, New Jersey, United States.

<sup>3</sup>MD Anderson Cancer Center at Cooper, Camden, New Jersey, United States.

<sup>4</sup>Lineberger Comprehensive Cancer Center, University of North Carolina at Chapel Hill School of Medicine, Chapel Hill, North Carolina, United States.

<sup>5</sup>Curriculum in Toxicology and Environmental Medicine, University of North Carolina at Chapel Hill School of Medicine, Chapel Hill, North Carolina, United States.

<sup>6</sup>Department of Pathology and Laboratory Medicine, University of North Carolina at Chapel Hill School of Medicine, Chapel Hill, North Carolina, United States.

<sup>7</sup>Department of Otolaryngology-Head and Neck Surgery, The University of North Carolina School of Medicine at Chapel Hill, Chapel Hill, North Carolina.

<sup>8</sup>Department of Genetics, University of North Carolina at Chapel Hill School of Medicine, Chapel Hill, North Carolina, United States.

<sup>9</sup>UNC Neuroscience Center, University of North Carolina at Chapel Hill School of Medicine, Chapel Hill, North Carolina, United States.

<sup>10</sup>Department of Cell Biology and Physiology, Washington University in St. Louis, St. Louis, Missouri, United States.

**\*To whom the correspondence should be addressed**

Samera H Hamad, PhD: Cooper Medical School of Rowan University, 401 Haddon Ave, E&R Building,  
Camden, NJ 08103, Tel: (608) 217-3839, United States [hamad@rowan.edu](mailto:hamad@rowan.edu) or [samera3h@gmail.com](mailto:samera3h@gmail.com)

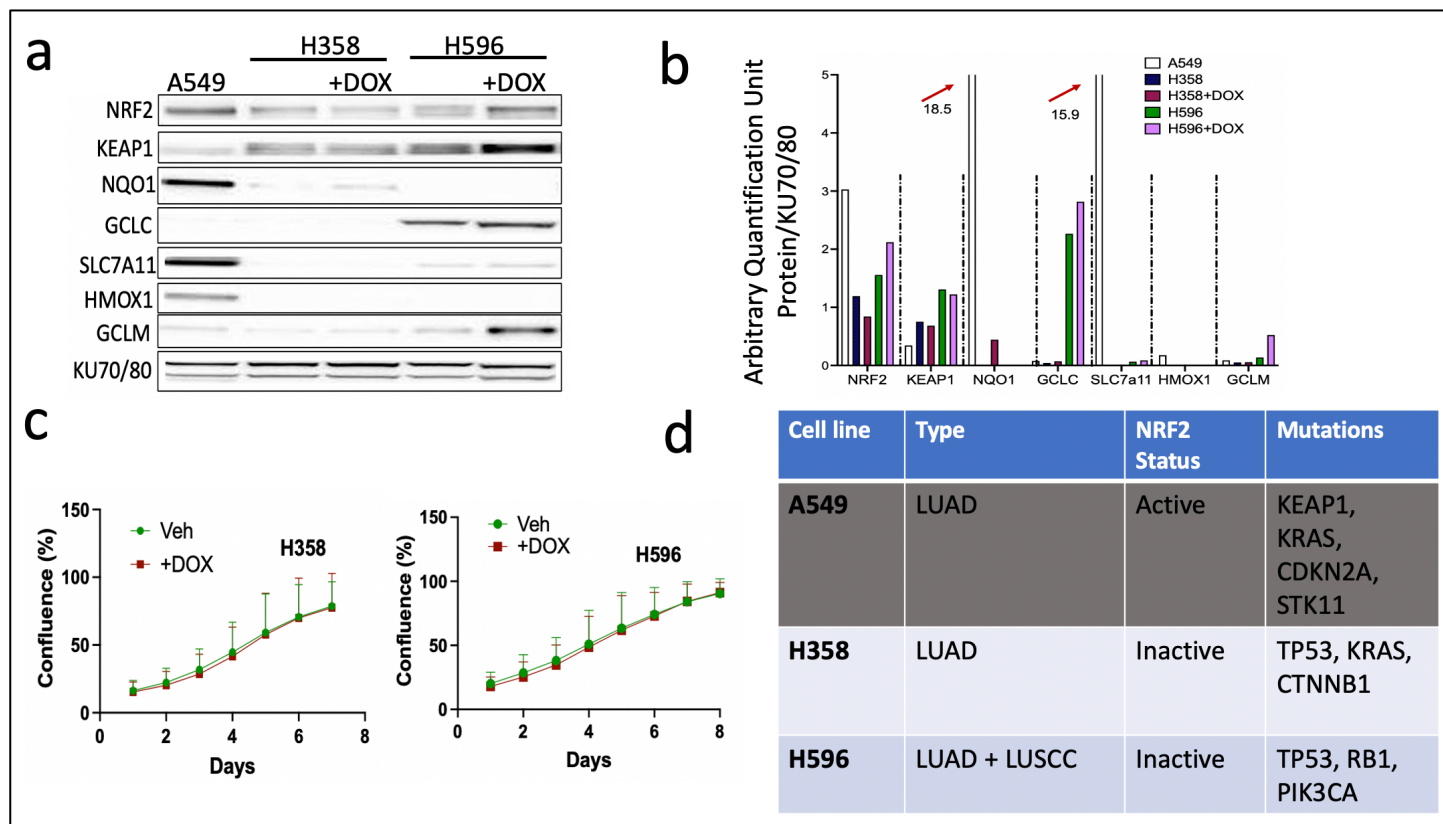

**Supplementary Figure 1. Human NSCLC cell lines used in this study.** **a** Western blotting of human cell lines with and without DOX, **b** protein quantification presented in **a**, **c** In vitro growth of H358 and H596 parent cell lines, error bars represent 3 technical replicates across 3 biological replicates, **d** Table shows A549 (positive control), H358 and H596 cell lines with NRF2 status and major mutations.

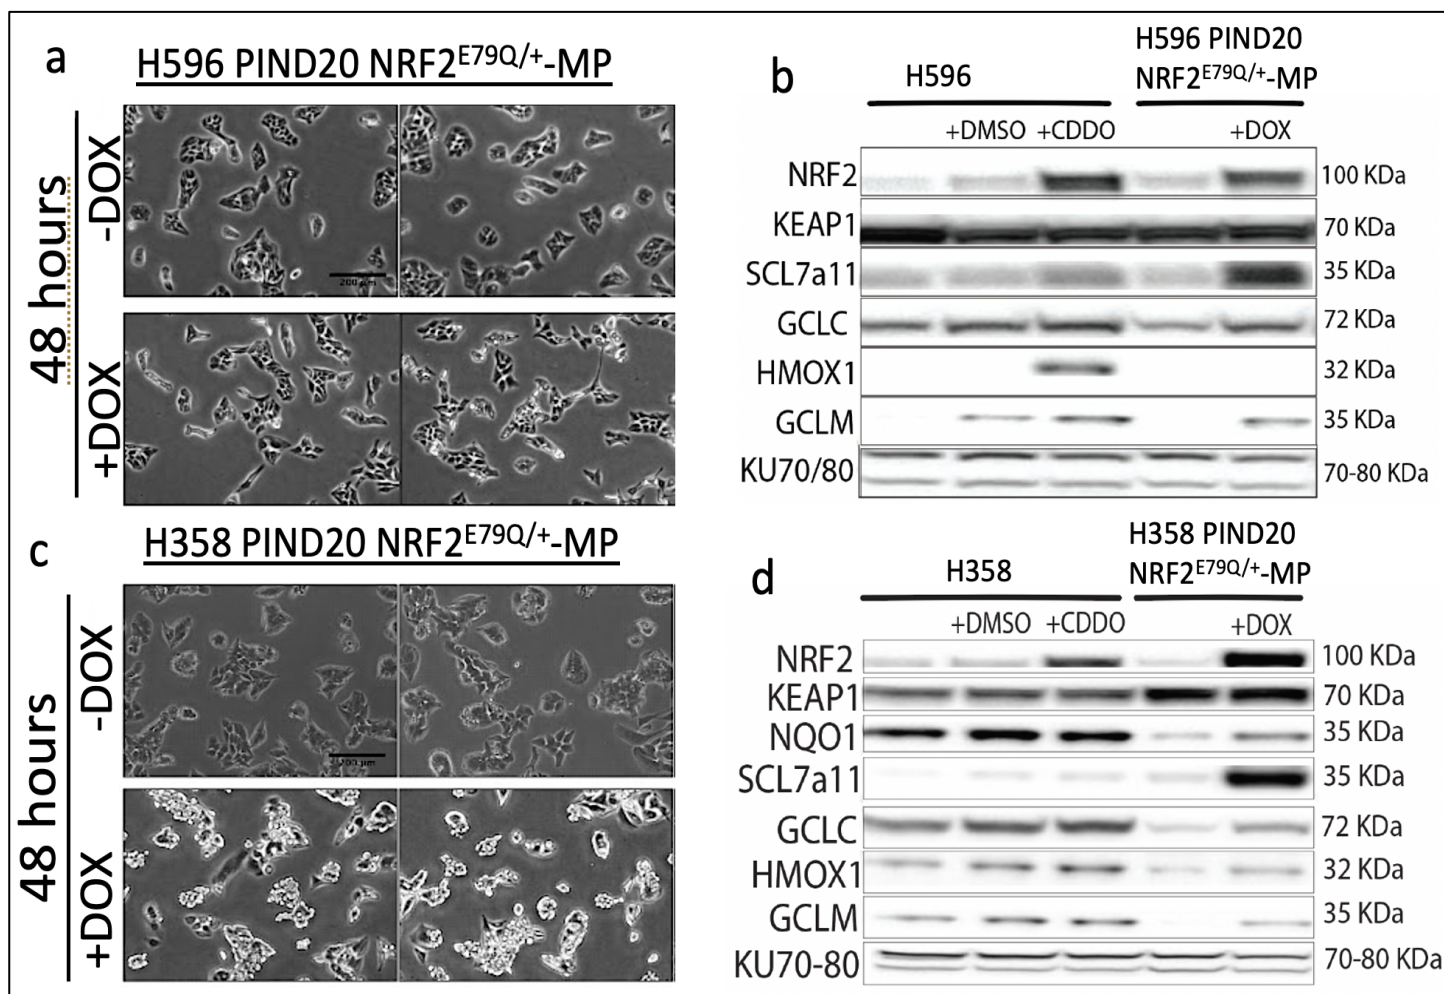

**Supplementary Figure 2. Induction of NRF2<sup>E79Q</sup> in human non-small cell lung cancer cell lines in vitro.** **a** Changes in cell morphology observed (in vitro) after 48 hours-Doxycycline (DOX) treatment to activate NRF2<sup>E79Q</sup> in H596 pIND20 NRF2<sup>E79Q/+</sup>-MP (+DOX, 1μg/ml), with **b** Immunoblotting showing the NRF2<sup>E79Q</sup> mutation and its downstream targets; **c** Changes in cell morphology observed (in vitro) after 48 hours of DOX treatment to activate NRF2<sup>E79Q</sup> in H358 pIND20 NRF2<sup>E79Q/+</sup>-MP (+DOX, 1μg/ml), with **d** western blotting showing the NRF2<sup>E79Q</sup> mutation and its downstream targets; MP: polyclonal, scale bar=200μm.



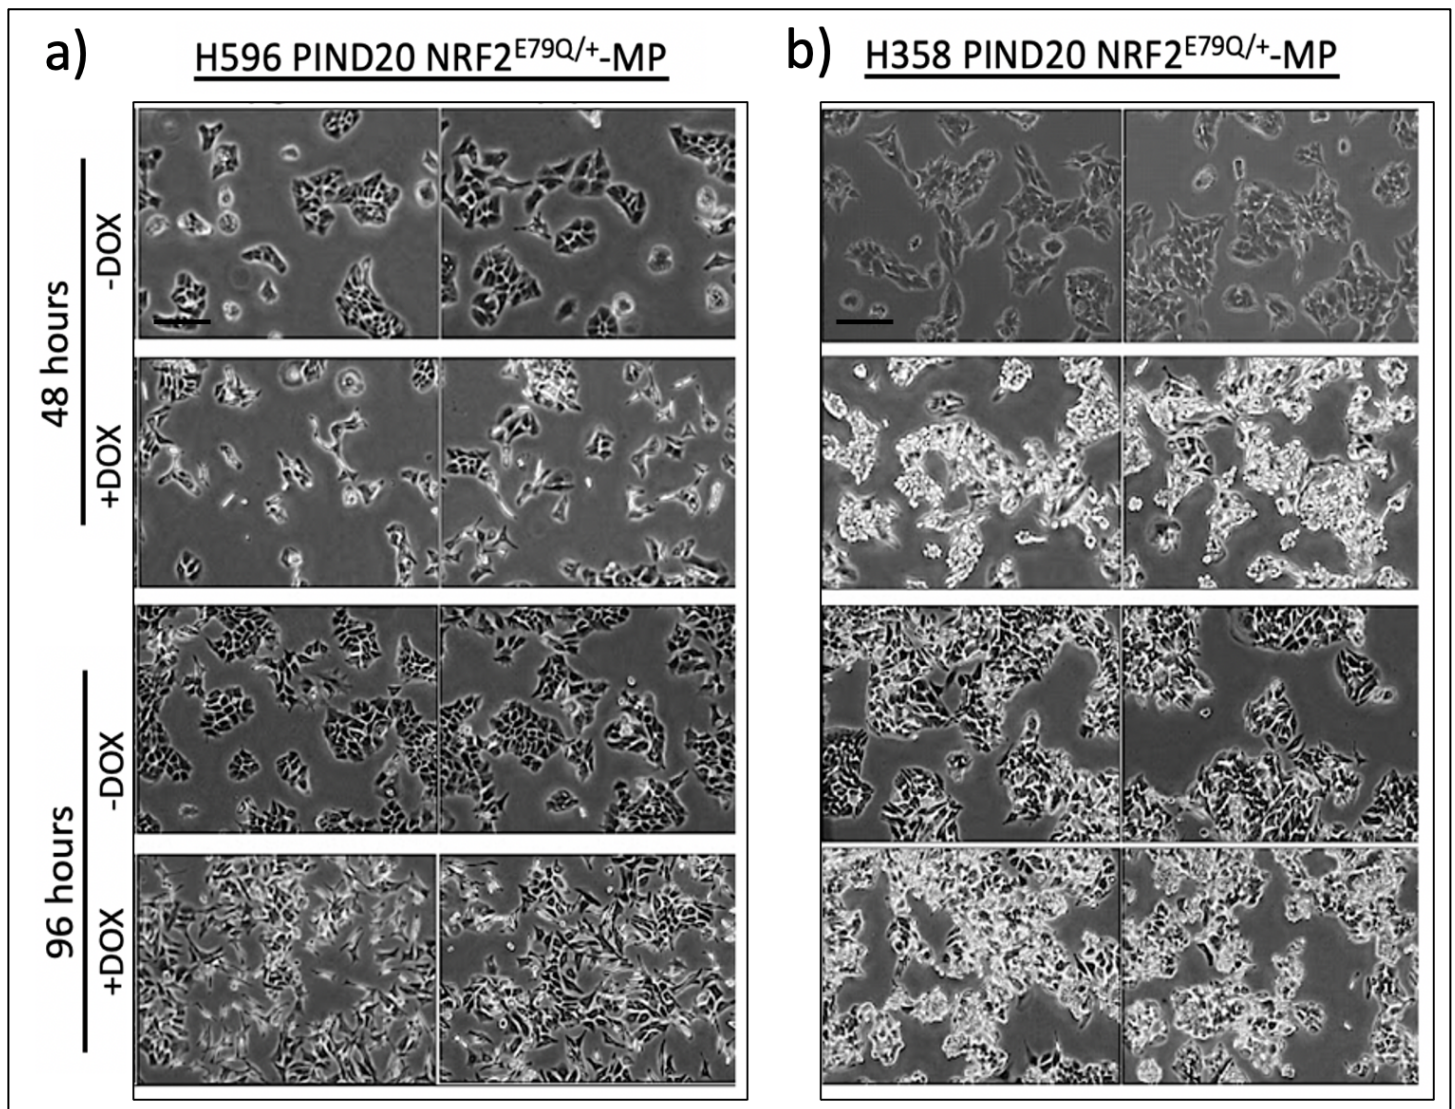

**Supplementary Figure 3. Activating NRF2<sup>E79Q</sup> in human non-small cell lung cancer cell lines in vitro.** Changes in cell morphology observed (in vitro-in 2 different fields per cell line) after 48 and 96 hours of DOX treatment to activate NRF2<sup>E79Q</sup> in **a** H596 pIND20 NRF2<sup>E79Q/+</sup>-MP; and **b** H358 pIND20 NRF2<sup>E79Q/+</sup>-MP, (+DOX, 1mg/ml), MP-Polyclonal, scale bar=200μm.

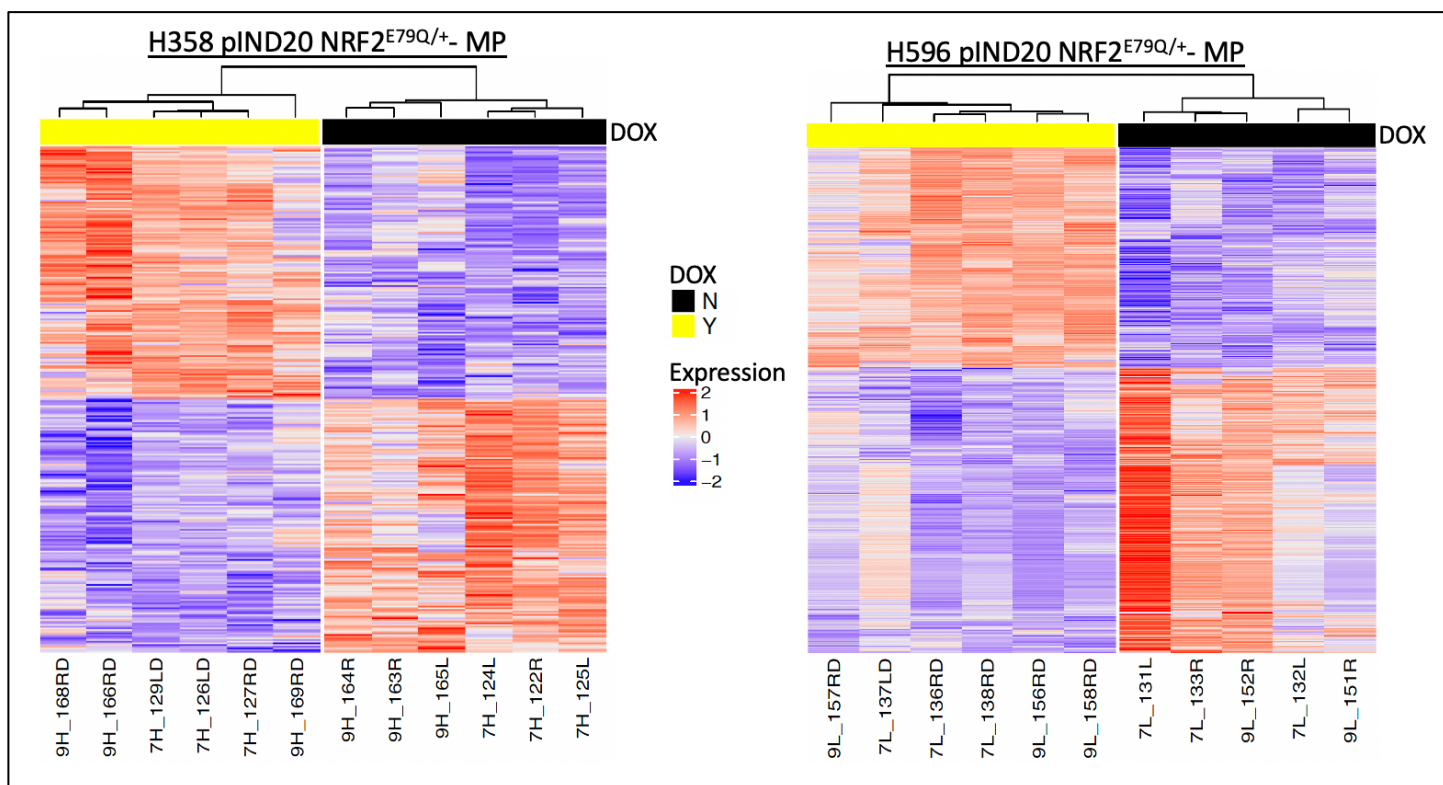

**Supplementary Figure 4. RNA-seq data analysis of lung adeno-squamous cell carcinoma (H596 pIND20 NRF2<sup>E79Q</sup>-MP) and lung adenocarcinoma (H358 pIND20 NRF2<sup>E79Q</sup>-MP) cell line. a** heatmap showing the significantly and differently expressed genes (FDR < 0.05) with activating NRF2<sup>E79Q</sup> mutation (after DOX treatment) versus no NRF2 activation in **a** H596 pIND20 NRF2<sup>E79Q</sup>-MP, and **b** H358 pIND20 NRF2<sup>E79Q</sup>-MP tumors.

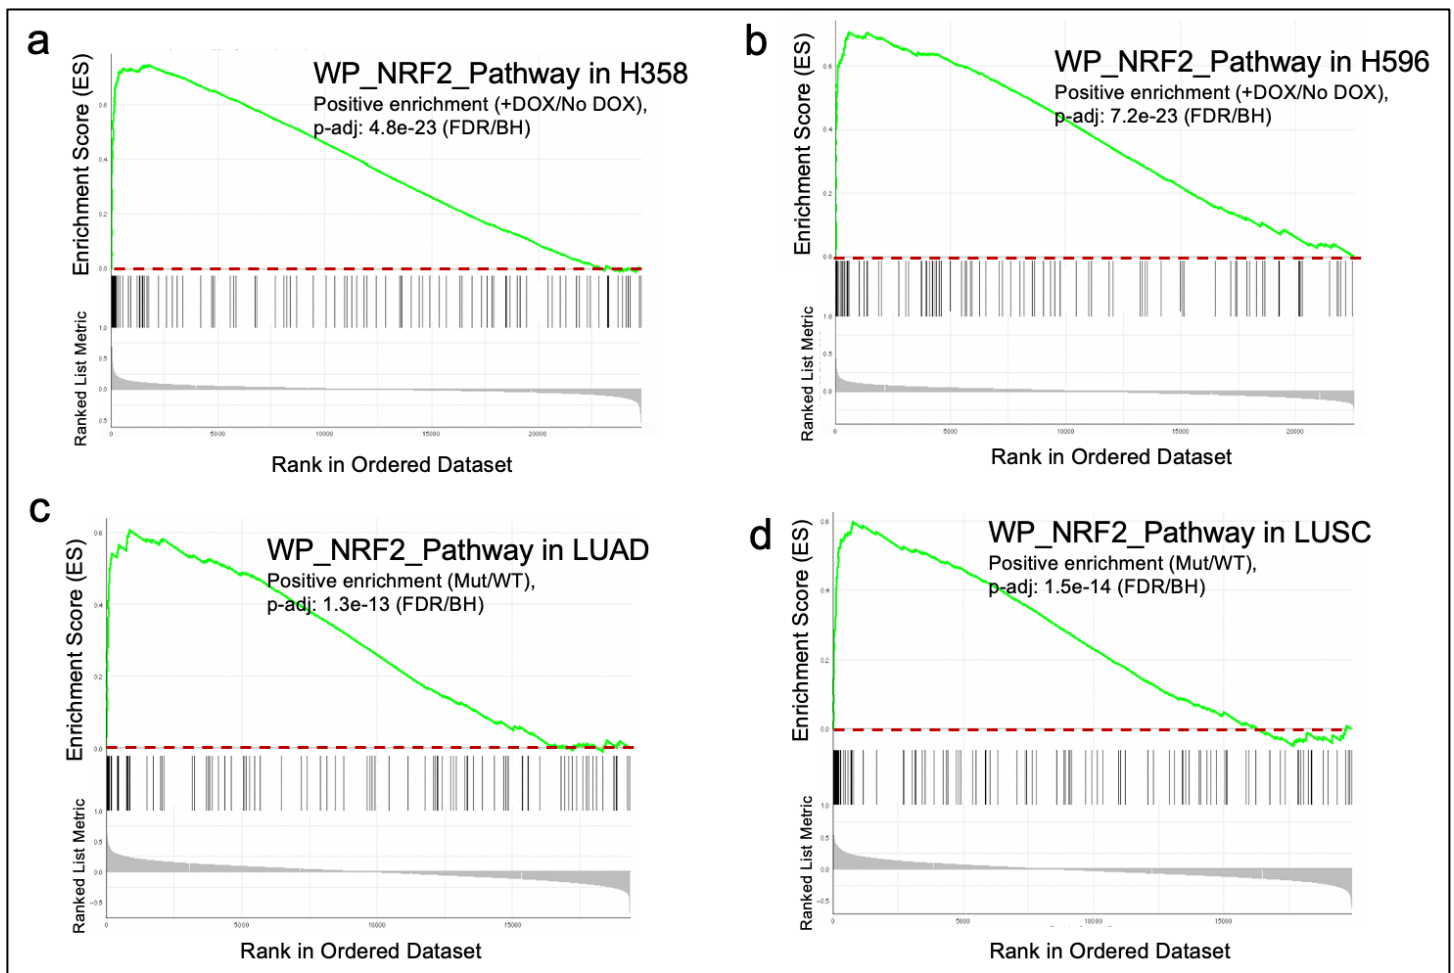

**Supplementary Figure 5. Enrichment score of NRF2 gene signatures in primary human tumors and human NSCLC cell lines used in this study.** **a** NRF2 signaling pathway is also significantly enriched after NRF2<sup>E79Q</sup> activation, by doxycycline (DOX, 1 $\mu$ g/ml) treatment, in human lung adenocarcinoma (H358) cell line tumors, and **b** human lung adeno-squamous cell carcinoma (H596) cell line tumors; and **c** NRF2 signaling pathway is significantly enriched in mutant (Mut)-NRF2 human lung adenocarcinoma (LUAD) tumors, and **d** Mut-NRF2 human lung squamous cell carcinoma (LUSC) tumors compared to wild type (WT) tumors.



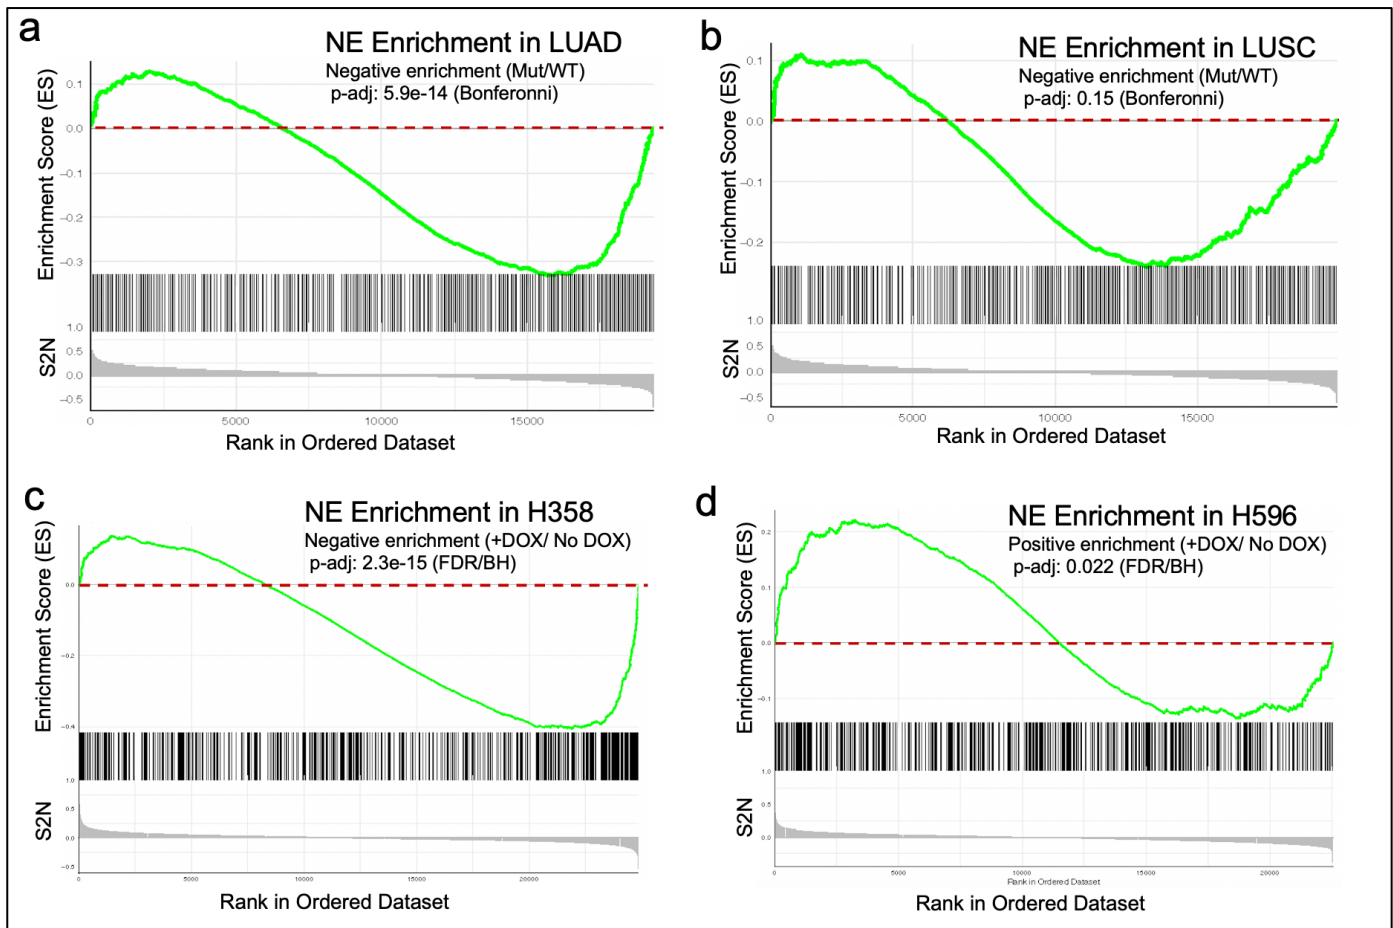

**Supplementary Figure 6. Enrichment scores of neuroendocrine (NE) genes signature in primary human tumors (from TCGA) and human NSCLC cell lines used in this study.** **a.** and **c.** Highly significant negative enrichment of NE in the NRF2 activated (mutant) primary lung adenocarcinoma (LUAD) tumors (**a**) and in the activated NRF2<sup>E79Q</sup> lung adenocarcinoma (H358) cell line (**c**). **b.** and **d.** No significant enrichment of NE in NRF2 activated (mutant) primary lung squamous cell carcinoma (LUSC) tumors (**b**) and significant positive enrichment in the activated NRF2<sup>E79Q</sup> lung adeno-squamous cell carcinoma (H596) cell line (**d**).

**Supplementary Table 5. Antibodies used in this study with their primary and secondary dilutions.**

| Antibody                   | Company/Catalog number | 1° Antibody dilution | 2° Antibody dilution |
|----------------------------|------------------------|----------------------|----------------------|
| <b>NRF2</b>                | Abcam/ab137550         | 1:1000               | 1:2000               |
| <b>KEAP1</b>               | Proteintech/10503-2-AP | 1:1000               | 1:3000               |
| <b>SLC7A11</b>             | Cell Signaling/12691   | 1:1000               | 1:2000               |
| <b>P63</b>                 | Abcam/ab124762         | 1:1000               | 1:1000               |
| <b>NKX2-1</b>              | Abcam/ab76013          | 1:1000               | 1:1000               |
| <b>Synaptophysin (SYP)</b> | Cell Signaling/ D8F6H  | 1:200                | 1:500                |

**Supplementary Table 6.** Scoring criteria for immunohistochemistry (IHC).

| Positively Labelled Cells |       | Labelling Intensity |       |
|---------------------------|-------|---------------------|-------|
| Percent                   | Score | Intensity           | Score |
| ≤ 5%                      | 0     | Absent              | 0     |
| 6%-25%                    | 1     | Weak                | 1     |
| 26%-50%                   | 2     | Moderate            | 2     |
| 51%-75%                   | 3     | Strong              | 3     |
| 76%-100%                  | 4     |                     |       |
