# Supplementary material for: Activating NRF2E79Q mutation alters the differentiation of human non-small cell lung cancer
Source: Research Square preprint supplement (doi:10.21203/rs.3.rs-6606334/v1), 2025-05-15
Supplement: Supplementary file 1 [file 533d664654c49477d26d3149.xlsx]

## Sheet: H358
Supplementary Table 3a. Single sample gene set enrichment score of ADC, SCC, MYC, NE and YAP1 signature in lung adenocarcinoma (H358) tumor cell line
geneset	H358 pIND20 NRF2-E79Q +DOX						H358 pIND20 NRF2-E79Q (N.T*)
	X7H_126LD	X7H_127RD	X7H_129LD	X9H_166RD	X9H_168RD	X9H_169RD	X7H_122R	X7H_124L	X7H_125L	X9H_163R	X9H_164R	X9H_165L
ADC	2325.22	1815.79	2156.89	3126.41	3082.22	2431.33	3710.74	3474.78	4115.52	3058.49	3439.9	4296.51
SCC	2795.78	2976.92	2417.1	2903.89	2377	2331.19	2155.56	3381.42	3450.08	5569.08	4802.87	1534.4
MYC	9671.57	9634.7	9522.27	9271.43	9479.01	9627.58	9673.05	9642.37	9536.22	9468.92	9425.25	9584.98
NE	2208.67	2153.85	2208.39	2400.58	2248.68	2019	2533.73	2731.6	2641.42	2615.53	2571.35	2367.57
YAP1	1899.82	1863.52	1898.26	2125.81	1940.68	1682.59	2183.96	2433.17	2274.4	2275.33	2230.1	1962.71
*N.T	No Treatment

## Sheet: H596
Supplementary Table 3b. Single sample gene set enrichment score of ADC, SCC, MYC, NE and YAP1 signature in lung deno-squamous cell carcinoma (H596) tumor cell line
geneset	H596 pIND20 NRF2-E79Q +DOX						H596 pIND20 NRF2-E79Q (N.T*)
	X7L_136RD	X7L_137LD	X7L_138RD	X9L_156RD	X9L_157RD	X9L_158RD	X7L_131L	X7L_132L	X7L_133R	X9L_151R	X9L_152R
ADC	-3308.18	-1859.33	-3346.12	-2709.57	-1415.29	-2534.34	-982.063	-2267.66	-1110.75	-2472.76	-1375.16
SCC	7237.77	7476.31	7649.95	7623.59	7688.68	7577.38	7186.84	7973.82	7774.98	8093.73	7942.29
MYC	9721.27	9359.49	9569.98	9641.06	9363.38	9306.86	8732.22	9433.38	9585.23	9624.18	9260.11
NE	2051.85	1800.49	1944.74	2030.39	1820.66	1913.17	1747.11	1809.79	1720.49	1894.52	1830.27
YAP1	1789.66	1477.75	1563.04	1718.29	1487.1	1513.69	1366.29	1440.54	1416.29	1591.31	1453.06
*N.T	No Treatment

## Sheet: headDesc
heading	description
geneset	Gene set name
<SampleID>	Directional single sample gsea score (not normalized)
