# Supplementary material for: Activating NRF2E79Q mutation alters the differentiation of human non-small cell lung cancer
Source: Research Square preprint supplement (doi:10.21203/rs.3.rs-6606334/v1), 2025-05-15
Supplement: Supplementary file 2 [file d4cbe112430ca8b1f02605a7.xlsx]

## Sheet: Supplementray Table 1
Supplementary Table 1. Human tumor samples information
skip	subject	sample	aliquot	tumorType	gender	dir	file	size	md5	nfe2l2	skipReason
	TCGA-05-4244	TCGA-05-4244-01A	TCGA-05-4244-01A-01R-1107-07	LUAD	male	ef337612-6a73-4c29-a8b0-85557cbeaff4	e0e055b6-6800-40e7-bde5-718823408f0c.rna_seq.augmented_star_gene_counts.tsv	4252251	2e1f64aaf757b8f55ee8a3fa59db18d0	NO_NFE2L2
	TCGA-05-4249	TCGA-05-4249-01A	TCGA-05-4249-01A-01R-1107-07	LUAD	male	320660cd-100a-4f5a-a604-4de3ced7f042	258b0b5e-2b09-4378-9606-83955ca19d7c.rna_seq.augmented_star_gene_counts.tsv	4249973	3a758779c173708b74d410af19c25e8e	CUL3
	TCGA-05-4250	TCGA-05-4250-01A	TCGA-05-4250-01A-01R-1107-07	LUAD	female	72db648d-0ff7-418b-b7bd-590eda282f74	f0395da6-5f12-4a35-8aa6-0b1b47a2acba.rna_seq.augmented_star_gene_counts.tsv	4245810	b7ee69b362188669c7924dabfb628b0d	NO_NFE2L2
	TCGA-05-4382	TCGA-05-4382-01A	TCGA-05-4382-01A-01R-1206-07	LUAD	male	f2d6b758-501e-447a-a3d0-f899e532ac84	430458f1-86d8-4ec8-a8fe-6a58ac832bdd.rna_seq.augmented_star_gene_counts.tsv	4267420	df0dd387c7cc0c8894c084cc850ad780	NO_NFE2L2
	TCGA-05-4384	TCGA-05-4384-01A	TCGA-05-4384-01A-01R-1755-07	LUAD	male	b4de06a8-883b-4d02-afc6-d926c588c4ee	819e9776-131f-4c00-b93c-9936cbcc55b8.rna_seq.augmented_star_gene_counts.tsv	4232066	3eb007b6bd0a164f0f79485eeaecbe4b	KEAP1
	TCGA-05-4389	TCGA-05-4389-01A	TCGA-05-4389-01A-01R-1206-07	LUAD	male	7d27e93b-f225-4b30-91b7-5b968d04d783	f3b31315-692c-4040-9f89-1a9988ed2fbc.rna_seq.augmented_star_gene_counts.tsv	4247394	a027d459babff6b6fc3f7cf01ef58377	KEAP1
	TCGA-05-4390	TCGA-05-4390-01A	TCGA-05-4390-01A-02R-1755-07	LUAD	female	780617e8-6a28-4774-b1e6-3135e1932327	5a1b3a79-375e-47a7-8a30-b37fbfd8162d.rna_seq.augmented_star_gene_counts.tsv	4223286	e3b4c6bab93e8bb6c408fdeb991b526a	NO_NFE2L2
	TCGA-05-4395	TCGA-05-4395-01A	TCGA-05-4395-01A-01R-1206-07	LUAD	male	84f2b69e-86e5-4bf6-a11c-289b1971775f	3f7a9aee-2d10-4426-855b-de9a48b278ce.rna_seq.augmented_star_gene_counts.tsv	4247796	c9209dd6777e11e93691cecafa57033a	KEAP1
	TCGA-05-4396	TCGA-05-4396-01A	TCGA-05-4396-01A-21R-1858-07	LUAD	male	5ddf8f4a-edd8-4b97-8d4d-76655d9018c5	59a0b90e-8b8b-41b8-95f0-d51961a94be5.rna_seq.augmented_star_gene_counts.tsv	4221814	26904b98fc550132996ccef4342a5cb3	NO_NFE2L2
	TCGA-05-4397	TCGA-05-4397-01A	TCGA-05-4397-01A-01R-1206-07	LUAD	male	ba3e1d1e-3193-4770-9c57-b4ff1502af38	ce68bb71-4052-499c-bf2e-81d9c0dafc9b.rna_seq.augmented_star_gene_counts.tsv	4269436	c7dcea8c2e92fa09fbb39ad9230688ff	NO_NFE2L2
	TCGA-05-4398	TCGA-05-4398-01A	TCGA-05-4398-01A-01R-1206-07	LUAD	female	a308da6a-7eec-4a96-8884-d6ea49637744	14797b04-c56a-4ceb-bd0f-a4e785e90f75.rna_seq.augmented_star_gene_counts.tsv	4269503	f0cecb0ee5d1b480a3579cd29f642f1c	NO_NFE2L2
	TCGA-05-4402	TCGA-05-4402-01A	TCGA-05-4402-01A-01R-1206-07	LUAD	female	2e0c7cfb-2794-4c86-b43e-8215c39186d8	882d1be3-1f82-41e7-8538-1ef513efef32.rna_seq.augmented_star_gene_counts.tsv	4264467	35491666b4f49853c1524df9a52c2418	NO_NFE2L2
	TCGA-05-4403	TCGA-05-4403-01A	TCGA-05-4403-01A-01R-1206-07	LUAD	male	4981d1f3-2824-4cd0-81b8-e12a9727a248	1f7938f1-e04e-4ed0-8189-3d701c6fef72.rna_seq.augmented_star_gene_counts.tsv	4250196	bb9e2d908f47845c0c574bc498442c33	NO_NFE2L2
	TCGA-05-4405	TCGA-05-4405-01A	TCGA-05-4405-01A-21R-1858-07	LUAD	female	9dffc7c0-da78-48a9-b438-a4886a45048e	52b34ef3-a814-4aa9-a395-6beea6a71f11.rna_seq.augmented_star_gene_counts.tsv	4229534	ef3ff1b0c15f22c4187e34058739096c	NO_NFE2L2
	TCGA-05-4410	TCGA-05-4410-01A	TCGA-05-4410-01A-21R-1858-07	LUAD	male	38259364-ebcb-4f5f-8471-8ffe7e3267a7	d3c861af-cfe9-4d9f-bc76-a8a45b72df43.rna_seq.augmented_star_gene_counts.tsv	4221046	3686b1d5a952e94fe7132a37aa656d8d	CUL3
	TCGA-05-4415	TCGA-05-4415-01A	TCGA-05-4415-01A-22R-1858-07	LUAD	male	892294a6-6b94-4284-bae3-9eb0bdc853f6	981bfd73-1d4c-47c0-870a-b9a6300858dc.rna_seq.augmented_star_gene_counts.tsv	4230310	6959c489a603e1f8d501b811b7446fb7	NO_NFE2L2
	TCGA-05-4417	TCGA-05-4417-01A	TCGA-05-4417-01A-22R-1858-07	LUAD	female	62560d5c-0cae-4fc7-820a-9c1236eb2c80	f30ea4c5-0110-403e-b171-2ea1e35c1ea0.rna_seq.augmented_star_gene_counts.tsv	4226025	8bfa27688dff26f89c327a22f31fd088	NO_NFE2L2
	TCGA-05-4418	TCGA-05-4418-01A	TCGA-05-4418-01A-01R-1206-07	LUAD	male	7429ab01-a223-4be3-9b41-99100ea06d99	e860f314-beb1-4dfd-adb8-e188f13ca1c8.rna_seq.augmented_star_gene_counts.tsv	4248016	18faa9f923350f09f5f136d780c74582	KEAP1
	TCGA-05-4420	TCGA-05-4420-01A	TCGA-05-4420-01A-01R-1206-07	LUAD	male	65b91a69-f98e-49b5-8f87-667dd0aeafdf	9c92bdc5-8b9b-4843-82a4-2fa6ee4d40a3.rna_seq.augmented_star_gene_counts.tsv	4256372	51f33d209baeefcd45088777641baf87	NO_NFE2L2
	TCGA-05-4422	TCGA-05-4422-01A	TCGA-05-4422-01A-01R-1206-07	LUAD	male	60477322-5657-495a-8ce3-4f806acd3dcb	b3f38fc5-d1e6-4fd9-bd36-b413a3ac850e.rna_seq.augmented_star_gene_counts.tsv	4260745	8d2243d599431039568c47062d3ec343	NO_NFE2L2
	TCGA-05-4424	TCGA-05-4424-01A	TCGA-05-4424-01A-22R-1858-07	LUAD	male	07a53d2a-ebf6-4517-880a-064bae5ee972	d20f5121-5e33-4b35-8cdf-df2eb51a099d.rna_seq.augmented_star_gene_counts.tsv	4236934	ba99497a83fd8312faf8218093ec83fe	NO_NFE2L2
	TCGA-05-4425	TCGA-05-4425-01A	TCGA-05-4425-01A-01R-1755-07	LUAD	female	e6629c88-a050-41ed-afe7-e74255f4d3b1	894424ab-29c3-4f41-88e7-f59d0df10c28.rna_seq.augmented_star_gene_counts.tsv	4229514	d6104d2dbbc02f7b9cd071183062420a	NO_NFE2L2
	TCGA-05-4426	TCGA-05-4426-01A	TCGA-05-4426-01A-01R-1206-07	LUAD	male	f1b1d4ff-2556-44c0-80b0-1fd3b659c227	06deab65-ccea-473f-ad0e-7e3928df2e07.rna_seq.augmented_star_gene_counts.tsv	4256229	1618b0b86ca8a5699ddee760e8536180	NO_NFE2L2
	TCGA-05-4427	TCGA-05-4427-01A	TCGA-05-4427-01A-21R-1858-07	LUAD	female	4297f902-2495-48fb-af36-31e61f727215	d2bf5f92-08f4-492e-96c2-399262f96828.rna_seq.augmented_star_gene_counts.tsv	4231510	1cfbf6dd348981359811261b7ccf3ee0	NO_NFE2L2
	TCGA-05-4430	TCGA-05-4430-01A	TCGA-05-4430-01A-02R-1206-07	LUAD	female	06d5f913-5f62-4200-8a51-26c8fa2052b4	aae80a97-730b-4180-93de-56ddbb262419.rna_seq.augmented_star_gene_counts.tsv	4252345	51b320794dc34b908d9107b6209509b5	NO_NFE2L2
	TCGA-05-4432	TCGA-05-4432-01A	TCGA-05-4432-01A-01R-1206-07	LUAD	male	2281a9d6-bd48-418a-9ad1-04b06a251e47	36db1d28-8a10-46cc-91ef-d5036aaba9c3.rna_seq.augmented_star_gene_counts.tsv	4257756	f5b0bdb648131cc3e4480a83fa5ccc2e	NO_NFE2L2
	TCGA-05-4433	TCGA-05-4433-01A	TCGA-05-4433-01A-22R-1858-07	LUAD	male	3aa81439-d4cc-41ef-9568-e6a11c8b1b52	a6a841ae-f63f-45ab-9a17-2288e12a9577.rna_seq.augmented_star_gene_counts.tsv	4223188	05bfeecde7362dbcbae722eb21ce6d96	NO_NFE2L2
	TCGA-05-4434	TCGA-05-4434-01A	TCGA-05-4434-01A-01R-1206-07	LUAD	female	25f44be3-2e4f-4121-ac23-21bd3866dbce	e62d96e9-3e79-4eef-9e5e-568a48dd737b.rna_seq.augmented_star_gene_counts.tsv	4272092	3060c8a23e9334d28c758f13f50b9c5c	NO_NFE2L2
X	TCGA-05-5420	TCGA-05-5420-01A	TCGA-05-5420-01A-01R-1628-07	LUAD	male	b0eade9b-2ce4-4ffd-9db3-56958b452af6	5fd9d2a8-3a95-440c-a0de-8ad5fd86e156.rna_seq.augmented_star_gene_counts.tsv	4215562	88b52b517e276c84c611088e63c1d0be		No mutation data
	TCGA-05-5423	TCGA-05-5423-01A	TCGA-05-5423-01A-01R-1628-07	LUAD	male	b0dc4a18-3099-46fc-a518-9e411c6c15f3	3ddd596f-b02f-4b51-a837-3c684437600f.rna_seq.augmented_star_gene_counts.tsv	4226413	5d14d39515b96c4cc35e5560d0332d1f	NO_NFE2L2
	TCGA-05-5425	TCGA-05-5425-01A	TCGA-05-5425-01A-02R-1628-07	LUAD	male	26ea6a31-ea33-4bb9-814f-c0840dafe69e	09728f38-787f-4868-b28d-8cf6afa3c71b.rna_seq.augmented_star_gene_counts.tsv	4230098	aaf8cfc5d793ce80ece61c7e168c55dd	NO_NFE2L2
	TCGA-05-5428	TCGA-05-5428-01A	TCGA-05-5428-01A-01R-1628-07	LUAD	male	e17426a8-cf69-4ed4-b54e-cc33cbadf095	ef304a3b-e32b-450e-8c40-4173aa0a0366.rna_seq.augmented_star_gene_counts.tsv	4215388	011ef4fcca6b7ad8d761a1777999dfe5	NO_NFE2L2
	TCGA-05-5429	TCGA-05-5429-01A	TCGA-05-5429-01A-01R-1628-07	LUAD	male	2a9f6775-bb04-4262-9eb2-d64a8e027010	4564496a-31da-4537-abe0-5b3f2455ed13.rna_seq.augmented_star_gene_counts.tsv	4217797	cfbc230d887e8a78009a208db0c503c2	NO_NFE2L2
	TCGA-05-5715	TCGA-05-5715-01A	TCGA-05-5715-01A-01R-1628-07	LUAD	female	20daa4af-7d88-42c8-9279-34372e687e5d	9446312e-b87c-411c-b9a3-a19603eff965.rna_seq.augmented_star_gene_counts.tsv	4218156	b8c63fb95772121ef09e0c404fc97c80	NO_NFE2L2
	TCGA-35-3615	TCGA-35-3615-01A	TCGA-35-3615-01A-01R-0946-07	LUAD	male	9726aa3d-8a66-4568-92e5-c092c05a9a5d	a308a190-de5d-401c-a030-e089cb6d39db.rna_seq.augmented_star_gene_counts.tsv	4248454	ab534cd31632ba632f7f220185851830	KEAP1
	TCGA-35-4122	TCGA-35-4122-01A	TCGA-35-4122-01A-01R-1107-07	LUAD	male	58dcd45a-714f-4a22-b367-813dd41829de	f21b5258-2e93-4fe0-bd98-9eb1216e824b.rna_seq.augmented_star_gene_counts.tsv	4233595	5c25b3fcf6e406dd7eda01e20d90b5d3	NO_NFE2L2
	TCGA-35-4123	TCGA-35-4123-01A	TCGA-35-4123-01A-01R-1107-07	LUAD	male	5a7bd024-3d92-4e64-86bd-b6eea34f6526	e9f19ff2-29c5-4578-9c23-9d58c192ff59.rna_seq.augmented_star_gene_counts.tsv	4237587	51f8dffbecf75b35908f5483dfe3d7e5	NO_NFE2L2
	TCGA-35-5375	TCGA-35-5375-01A	TCGA-35-5375-01A-01R-1628-07	LUAD	male	0052ae83-7ae5-470a-a125-5cd94a9fa9e9	a6a6b9c6-9db7-42b3-a09f-770b7e126fbb.rna_seq.augmented_star_gene_counts.tsv	4208285	3965545354a18beca3a6159f16b254fe	KEAP1
	TCGA-38-4625	TCGA-38-4625-01A	TCGA-38-4625-01A-01R-1206-07	LUAD	female	242a2880-95da-453f-892d-fafd49a4865e	9301f86d-9d6f-4aa6-a640-a543b5aea5db.rna_seq.augmented_star_gene_counts.tsv	4261912	db04ade49f3788d672b6dee1d122c3e7	NO_NFE2L2
	TCGA-38-4626	TCGA-38-4626-01A	TCGA-38-4626-01A-01R-1206-07	LUAD	female	d1a18468-9c02-4d61-8e3e-43a6d23d402e	9bfd464b-419a-43c0-929a-c1d219713a6f.rna_seq.augmented_star_gene_counts.tsv	4260792	7b2ce17ae141f13d17fde3d0f594cd70	NO_NFE2L2
	TCGA-38-4627	TCGA-38-4627-01A	TCGA-38-4627-01A-01R-1206-07	LUAD	female	08971a88-cb64-4030-93e5-08d77d2ed654	978fb63c-dae9-4037-81c9-598e87341931.rna_seq.augmented_star_gene_counts.tsv	4243850	2fc7061fd638f84bc5aee8e89a793661	NO_NFE2L2
	TCGA-38-4628	TCGA-38-4628-01A	TCGA-38-4628-01A-01R-1206-07	LUAD	female	8cdb3ed5-5922-4833-b255-30d9322f8fe9	322ff57d-60a1-45d6-a103-c953d11924f1.rna_seq.augmented_star_gene_counts.tsv	4244946	c0f1f2bb8b197bfbade439b9eb0f7ff4	NO_NFE2L2
X	TCGA-38-4629	TCGA-38-4629-01A	TCGA-38-4629-01A-02R-1206-07	LUAD	male	6855a406-c085-45c7-b789-981786f0c775	9ebc079c-069f-4468-8b9e-680e39a3c4ad.rna_seq.augmented_star_gene_counts.tsv	4243976	27b48c36af06bc65f1e56fd5d4acf608		No mutation data
X	TCGA-38-4630	TCGA-38-4630-01A	TCGA-38-4630-01A-01R-1206-07	LUAD	female	739b3fc4-0924-4d13-aecc-acc93cb9f486	bc037eb7-5afa-4730-b896-23bf21a31641.rna_seq.augmented_star_gene_counts.tsv	4269814	f551ba1938fa0b0fcb81b8e7a4f1b03b		No mutation data
	TCGA-38-4631	TCGA-38-4631-01A	TCGA-38-4631-01A-01R-1755-07	LUAD	female	cab5b00a-9cf2-4e1f-b2f3-93d27b73631e	f48a9d85-c3c7-40bc-9215-760ba3b8fa60.rna_seq.augmented_star_gene_counts.tsv	4218349	5154d3e19c898832db7d8d0e19b736de	KEAP1
	TCGA-38-4632	TCGA-38-4632-01A	TCGA-38-4632-01A-01R-1755-07	LUAD	male	665a7af8-9c2d-4a31-9a22-da89fc7107b2	6f53a60f-3be2-48df-a15a-4675e99efba1.rna_seq.augmented_star_gene_counts.tsv	4220068	a66b49a6d71bc1607d8a2cac2552bf9e	NO_NFE2L2
	TCGA-38-6178	TCGA-38-6178-01A	TCGA-38-6178-01A-11R-1755-07	LUAD	female	ace52699-f049-4a11-ab3d-ce3719c62e41	0e3e11b9-9f43-4a0d-8665-023fae9f8b00.rna_seq.augmented_star_gene_counts.tsv	4223025	7edb44b06da1d77cd7dde2a9eece24a8	NO_NFE2L2
	TCGA-38-7271	TCGA-38-7271-01A	TCGA-38-7271-01A-11R-2039-07	LUAD	female	81d92351-c619-4585-9281-de33eaaabba4	98d020b1-0467-4131-a3cc-64d288d0e9e7.rna_seq.augmented_star_gene_counts.tsv	4219786	6517fb7e1116fc25434382dddce15503	NO_NFE2L2
	TCGA-38-A44F	TCGA-38-A44F-01A	TCGA-38-A44F-01A-11R-A24H-07	LUAD	male	7cb19688-bac4-41bf-b69e-977ac0da0aa1	aeea81c2-afda-410d-a0bb-955e7cddda09.rna_seq.augmented_star_gene_counts.tsv	4240623	627ad43fa8fa858f2eb4cb406d19f0fe	NO_NFE2L2
	TCGA-44-2655	TCGA-44-2655-01A	TCGA-44-2655-01A-01R-0946-07	LUAD	female	eac5ebd0-d788-4908-8eb7-976d6b611667	b8e8f06f-a5a9-4d16-b39f-585dcee31087.rna_seq.augmented_star_gene_counts.tsv	4258148	fe8bdb396de968ed406222a96e5f4e03	KEAP1
X	TCGA-44-2656	TCGA-44-2656-01A	TCGA-44-2656-01A-02R-0946-07	LUAD	male	77819b24-ea90-427b-8a99-c9a90417c903	b307f8c5-d21f-42ae-9771-07126d58999e.rna_seq.augmented_star_gene_counts.tsv	4256327	17ef1ace139348ed26e624c75141db31		Duplicated analysis with later subject aliquot
X	TCGA-44-2656	TCGA-44-2656-01A	TCGA-44-2656-01A-02R-A278-07	LUAD	male	201c0fbc-124c-4ef0-b767-393443a47892	b556d35a-4855-4e56-9e02-5fc939722169.rna_seq.augmented_star_gene_counts.tsv	4225966	07045111f6ff5d322b9f02f876376ccc		Duplicated analysis with later subject aliquot
	TCGA-44-2656	TCGA-44-2656-01B	TCGA-44-2656-01B-06R-A277-07	LUAD	male	c4bcc6b0-96a1-452b-9169-b4a16bcb9403	9f97863a-5019-41de-a095-dd20c4d55e02.rna_seq.augmented_star_gene_counts.tsv	4216012	e9946366cdcc77f45ae02b014e99a3d4	NO_NFE2L2
	TCGA-44-2657	TCGA-44-2657-01A	TCGA-44-2657-01A-01R-1107-07	LUAD	female	93db566e-8ff9-45b0-afa2-0fbe82b8f580	ab589a7b-7cc9-4257-8fd7-241d2e3658da.rna_seq.augmented_star_gene_counts.tsv	4232282	32b6fcb0736a85a6570c344798975243	NO_NFE2L2
	TCGA-44-2659	TCGA-44-2659-01A	TCGA-44-2659-01A-01R-0946-07	LUAD	female	dc8e99bb-f021-44e4-8c60-213405ee156a	325c7d6b-292d-46e5-85d1-785ae8a48c33.rna_seq.augmented_star_gene_counts.tsv	4252913	357e533a6bec9fcad430e9553c28a732	NO_NFE2L2
X	TCGA-44-2661	TCGA-44-2661-01A	TCGA-44-2661-01A-01R-1107-07	LUAD	female	c3e2e99a-537a-4263-a835-fef5ed2c3588	6906b453-44ef-404a-9fe6-2b4d5fa65110.rna_seq.augmented_star_gene_counts.tsv	4242191	71740f1664884b0683c335ba95d503db		No mutation data
X	TCGA-44-2662	TCGA-44-2662-01A	TCGA-44-2662-01A-01R-0946-07	LUAD	male	2bf191f1-b880-427e-996c-0e75df13d738	33e0a8b2-3e7e-46da-b5ef-76463308d3b9.rna_seq.augmented_star_gene_counts.tsv	4249593	ef0b2d0588b1848278ab06a7ef22b37d		Duplicated analysis with later subject aliquot
X	TCGA-44-2662	TCGA-44-2662-01A	TCGA-44-2662-01A-01R-A278-07	LUAD	male	946692ad-ed52-4bd8-85ac-efe5178b15b4	883ef55a-e8c0-4774-a298-d2bfeaeeae4b.rna_seq.augmented_star_gene_counts.tsv	4214980	c5392c7508ac9996a4d211b0920811c0		Duplicated analysis with later subject aliquot
	TCGA-44-2662	TCGA-44-2662-01B	TCGA-44-2662-01B-02R-A277-07	LUAD	male	1ab1279d-7ccd-4450-8de8-9987bf6627dd	3d11905a-16eb-40b2-a36b-e37dca6359d3.rna_seq.augmented_star_gene_counts.tsv	4225469	4a31afd3c6898a422bb240417fa53e34	NO_NFE2L2
X	TCGA-44-2665	TCGA-44-2665-01A	TCGA-44-2665-01A-01R-0946-07	LUAD	female	ba8aebd8-07de-46c0-a28f-b2408c36f07f	77b82c3f-e20c-4e3b-a55c-08af359bbb6e.rna_seq.augmented_star_gene_counts.tsv	4248160	d1590f85d1f41250edf7dd5f7518ddfb		Duplicated analysis with later subject aliquot
X	TCGA-44-2665	TCGA-44-2665-01A	TCGA-44-2665-01A-01R-A278-07	LUAD	female	e8da0b02-8b75-4a85-b91a-6f8d1582a95c	af649713-fb41-496a-a94b-3691d202c1c8.rna_seq.augmented_star_gene_counts.tsv	4218734	8c8ac3b98a35074a79bf21232c5d57b4		Duplicated analysis with later subject aliquot
	TCGA-44-2665	TCGA-44-2665-01B	TCGA-44-2665-01B-06R-A277-07	LUAD	female	fc732523-d387-4a1d-ab81-34e44e869bac	f7beaa9b-98ae-40bd-aadc-e69688499170.rna_seq.augmented_star_gene_counts.tsv	4195970	794184967e8d5da2c087e6b4a9d96b57	NO_NFE2L2
X	TCGA-44-2666	TCGA-44-2666-01A	TCGA-44-2666-01A-01R-0946-07	LUAD	male	52363b7b-f157-4fbe-8388-169b6152c9fe	655b5152-d150-4b2a-b7cc-ef70dc0b2256.rna_seq.augmented_star_gene_counts.tsv	4250387	9b7b008eedede6079972ef9bd66aacd9		Duplicated analysis with later subject aliquot
X	TCGA-44-2666	TCGA-44-2666-01A	TCGA-44-2666-01A-01R-A278-07	LUAD	male	36c7d3a4-193f-49fd-b367-e7aacc4eebe2	cc1646da-11b3-40c7-b35e-1206f4517b36.rna_seq.augmented_star_gene_counts.tsv	4219484	eb346ef9f4f426a55630d25f275026a9		Duplicated analysis with later subject aliquot
	TCGA-44-2666	TCGA-44-2666-01B	TCGA-44-2666-01B-02R-A277-07	LUAD	male	f0890456-1013-4e8a-9132-f05e2a1be5f2	00d461ae-a1d8-42f2-abd8-5e159363d857.rna_seq.augmented_star_gene_counts.tsv	4236555	d15fe4f1d7744375a26bac23ce1a5c56	NO_NFE2L2
X	TCGA-44-2668	TCGA-44-2668-01A	TCGA-44-2668-01A-01R-0946-07	LUAD	male	f47927c5-e1e9-4152-9817-79aa6e64111a	58e4f0e6-3b0f-4370-8abf-0b4d533672c5.rna_seq.augmented_star_gene_counts.tsv	4252751	0fc88797118778552f82be2c848df862		Duplicated analysis with later subject aliquot
X	TCGA-44-2668	TCGA-44-2668-01A	TCGA-44-2668-01A-01R-A278-07	LUAD	male	5f2d965a-25df-4736-a675-efeb59341a04	9a54be5e-6201-4beb-9689-289b9849756e.rna_seq.augmented_star_gene_counts.tsv	4199867	9d598f42a96080927d9e4ccc40ac79a8		Duplicated analysis with later subject aliquot
	TCGA-44-2668	TCGA-44-2668-01B	TCGA-44-2668-01B-02R-A277-07	LUAD	male	3e6105ba-3a23-4ac6-bf0d-1193fb2e679e	812033b2-3784-44bf-8913-56307b267ea9.rna_seq.augmented_star_gene_counts.tsv	4231014	10f9cdf7af7652974510dcd1a9457854	NO_NFE2L2
	TCGA-44-3396	TCGA-44-3396-01A	TCGA-44-3396-01A-01R-1206-07	LUAD	female	bbb70a6e-a91c-4c67-9ec0-b33185ab4f8d	1f7293ad-85b2-4d42-afcc-88cf1027cf5f.rna_seq.augmented_star_gene_counts.tsv	4263814	beeb398a1376012fdd784b5c99831e14	NO_NFE2L2
	TCGA-44-3398	TCGA-44-3398-01A	TCGA-44-3398-01A-01R-1107-07	LUAD	female	f73807f5-edf8-4a4d-8550-048d9c5413e5	1890feb6-9f7f-4437-9828-198ff43e16b0.rna_seq.augmented_star_gene_counts.tsv	4247285	4f063c01a122b4e335a57a03f8a93c05	NO_NFE2L2
X	TCGA-44-3917	TCGA-44-3917-01A	TCGA-44-3917-01A-01R-A278-07	LUAD	female	b0b5b05d-f782-449d-94cf-8fd74a4bd30c	146a69db-f304-4dd3-97e2-4d11b6512069.rna_seq.augmented_star_gene_counts.tsv	4206923	f325cd9d860c3a44c00a9224028439db		Duplicated analysis with later subject aliquot
	TCGA-44-3917	TCGA-44-3917-01B	TCGA-44-3917-01B-02R-A277-07	LUAD	female	88885dc7-5edd-4fac-95f8-9586880078a8	0b55cf48-41ca-4d54-a6c6-fa15c711370b.rna_seq.augmented_star_gene_counts.tsv	4230633	b3cf7fc9464e8e89d495db0609e12625	KEAP1
X	TCGA-44-3918	TCGA-44-3918-01A	TCGA-44-3918-01A-01R-1107-07	LUAD	female	cc1174cd-f902-46f0-9e69-b285b2b1317c	3f579bea-4481-42cd-b433-4f4ff65cf7b0.rna_seq.augmented_star_gene_counts.tsv	4248554	29dfdede38026aab732cfccf92916e1b		Duplicated analysis with later subject aliquot
X	TCGA-44-3918	TCGA-44-3918-01A	TCGA-44-3918-01A-01R-A278-07	LUAD	female	cff4fca2-d0e1-4e90-9d3c-639f995fc9ed	765dc4a5-ce4d-4437-9061-20c018bbbade.rna_seq.augmented_star_gene_counts.tsv	4221558	28c3026d2636d445b8b428bb938d758f		Duplicated analysis with later subject aliquot
	TCGA-44-3918	TCGA-44-3918-01B	TCGA-44-3918-01B-02R-A277-07	LUAD	female	ac98f8d2-fdc4-4925-8fce-7e86d7b89dec	758b1a4d-bd46-4611-b8c3-49c5f62a2dab.rna_seq.augmented_star_gene_counts.tsv	4232136	0d0585c93714d080a9d7a9990cedf30c	CUL3
	TCGA-44-3919	TCGA-44-3919-01A	TCGA-44-3919-01A-02R-1107-07	LUAD	female	55bbaa27-e618-48d6-bac3-80e9cfbcdf2c	81e85e60-a0b6-4898-8cb0-02ac1a70f157.rna_seq.augmented_star_gene_counts.tsv	4254644	741d33e726c4c9be4b6046322f6af731	NO_NFE2L2
X	TCGA-44-4112	TCGA-44-4112-01A	TCGA-44-4112-01A-01R-1107-07	LUAD	female	1e2233cf-4391-433c-9ef0-c215056ad02e	f3bf4152-5e1d-42d2-920e-9dfbe2e0dbc5.rna_seq.augmented_star_gene_counts.tsv	4244050	929da5bad6f59500e674e89ed90a83c2		Duplicated analysis with later subject aliquot
X	TCGA-44-4112	TCGA-44-4112-01A	TCGA-44-4112-01A-01R-A278-07	LUAD	female	9af8b2eb-3dbb-4688-a5fd-15abc0460f57	9aba4243-1817-4f5f-8e9d-66da98229246.rna_seq.augmented_star_gene_counts.tsv	4208224	f6fc77b947e6e066e3e5203ffcd134a1		Duplicated analysis with later subject aliquot
	TCGA-44-4112	TCGA-44-4112-01B	TCGA-44-4112-01B-06R-A277-07	LUAD	female	978939fa-a27f-46ff-9120-7a43e3588b28	1ca692e6-1dff-4d84-ace1-671bac7b9f61.rna_seq.augmented_star_gene_counts.tsv	4231341	c52df6c989b251c9ecc7761901121e67	NO_NFE2L2
	TCGA-44-5643	TCGA-44-5643-01A	TCGA-44-5643-01A-01R-1628-07	LUAD	male	db07bd22-cf7a-4504-9491-1bdeb1e14339	c29e5bb3-860d-4f1f-b27d-ae5b9d8c4208.rna_seq.augmented_star_gene_counts.tsv	4228126	3510c07447e7c8b228629caf2f48e938	NO_NFE2L2
	TCGA-44-5644	TCGA-44-5644-01A	TCGA-44-5644-01A-21R-2039-07	LUAD	female	23ab7447-ba7a-4947-bacf-2c0b209b38cf	e89ecf81-4892-48c8-be13-926f92d5ec97.rna_seq.augmented_star_gene_counts.tsv	4231458	0ed3b7ac747cca1ba51081f22c1cf742	NO_NFE2L2
X	TCGA-44-5645	TCGA-44-5645-01A	TCGA-44-5645-01A-01R-1628-07	LUAD	female	5601dc73-ba9b-4f53-95ef-5fc3de23640c	d6e945f2-4a94-48ab-9ba0-d4f0ee2fb262.rna_seq.augmented_star_gene_counts.tsv	4234980	07e0cb3e38fe8edaacff134fe7e79ea6		Duplicated analysis with later subject aliquot
X	TCGA-44-5645	TCGA-44-5645-01A	TCGA-44-5645-01A-01R-A278-07	LUAD	female	1c9ada61-d900-4498-9ef1-14a91212faf6	9e504ab4-85a0-465d-be52-0c28ed83e5f8.rna_seq.augmented_star_gene_counts.tsv	4224362	4bd120d884095948f8cc7ad075e8d008		Duplicated analysis with later subject aliquot
	TCGA-44-5645	TCGA-44-5645-01B	TCGA-44-5645-01B-04R-A277-07	LUAD	female	091d2c9e-a8cb-4212-a434-7c7d4fd75f7b	26fdaa75-cea5-4355-b3b1-6b5c2c75e542.rna_seq.augmented_star_gene_counts.tsv	4239205	e0a3d0c73a4ecadaaeb67d08afd25ca3	NO_NFE2L2
	TCGA-44-6145	TCGA-44-6145-01A	TCGA-44-6145-01A-11R-1755-07	LUAD	female	895ca581-915e-4057-b66a-dc2d5213d7e4	df2ac75d-208d-4cc1-867b-aea3e36117c6.rna_seq.augmented_star_gene_counts.tsv	4226858	da743f83b6d39a05dff925f0da155672	NO_NFE2L2
X	TCGA-44-6146	TCGA-44-6146-01A	TCGA-44-6146-01A-11R-1755-07	LUAD	male	7a2e7511-e77e-4805-82a3-cb9f5939ed26	735e3d15-4df3-4162-b819-1ebc1991bfce.rna_seq.augmented_star_gene_counts.tsv	4233266	de241e6043b73a7f78859994853a80b2		Duplicated analysis with later subject aliquot
X	TCGA-44-6146	TCGA-44-6146-01A	TCGA-44-6146-01A-11R-A278-07	LUAD	male	074b0792-df3c-4b59-9f50-793bc14bcb81	d832db0a-348f-4e28-953a-741192fe0826.rna_seq.augmented_star_gene_counts.tsv	4193934	14649b13fd8dd13a17a221ee244f9e34		Duplicated analysis with later subject aliquot
	TCGA-44-6146	TCGA-44-6146-01B	TCGA-44-6146-01B-04R-A277-07	LUAD	male	e21fc8e8-1f42-4c08-a54b-0bcc0f70d816	6338619f-470c-4ae1-8b45-959b5f9ad3da.rna_seq.augmented_star_gene_counts.tsv	4224395	14d91e8b8bd104b77a2a07bd8268f2c5	NO_NFE2L2
X	TCGA-44-6147	TCGA-44-6147-01A	TCGA-44-6147-01A-11R-1755-07	LUAD	female	9a64a124-9787-4378-ba01-b79aa183f25f	9a5e0fa6-a785-4d8e-bca5-43e02a3965bf.rna_seq.augmented_star_gene_counts.tsv	4244281	01b80d4c9a15f3697ce563666de5de0a		Duplicated analysis with later subject aliquot
X	TCGA-44-6147	TCGA-44-6147-01A	TCGA-44-6147-01A-11R-A278-07	LUAD	female	3c9960fd-92f3-4bab-9771-933c95edc37f	fd713184-4bb4-4e1b-a3b8-636273ee6ccc.rna_seq.augmented_star_gene_counts.tsv	4225614	414c6c615900b8785fb01b00f869bd59		Duplicated analysis with later subject aliquot
X	TCGA-44-6147	TCGA-44-6147-01B	TCGA-44-6147-01B-06R-A277-07	LUAD	female	9a6d8661-241e-4a3e-a6fa-e2eb1962b758	ee030015-242a-4dd1-b43c-2c97d5d365d9.rna_seq.augmented_star_gene_counts.tsv	4220334	287e77385c1a01c4a57e648ed0dbaba6		No mutation data
	TCGA-44-6148	TCGA-44-6148-01A	TCGA-44-6148-01A-11R-1755-07	LUAD	male	4a5c811e-d5d9-48d7-9bcc-4c9dc72df8f4	3f79d678-e5d5-443e-a7df-187c2acd2b2c.rna_seq.augmented_star_gene_counts.tsv	4242633	7cc33c13fc325e3a285abb18745e5789	NO_NFE2L2
	TCGA-44-6774	TCGA-44-6774-01A	TCGA-44-6774-01A-21R-1858-07	LUAD	female	3cd897bd-893e-4497-b9a5-56141816cff4	525e9185-ed15-403d-8987-93c50e4b89a1.rna_seq.augmented_star_gene_counts.tsv	4215469	aa703e7d855ef6d30195b729cdd1abbe	NO_NFE2L2
X	TCGA-44-6775	TCGA-44-6775-01A	TCGA-44-6775-01A-11R-1858-07	LUAD	female	beb3712d-76e3-4c3a-becb-c94048ea8a7f	7977a11b-246f-4c4c-a200-ee35d2d51fc5.rna_seq.augmented_star_gene_counts.tsv	4239333	a5d8eb7381258193c120fe312b79ee56		Duplicated analysis with later subject aliquot
X	TCGA-44-6775	TCGA-44-6775-01A	TCGA-44-6775-01A-11R-A278-07	LUAD	female	bbea4239-0ce8-4540-8818-d73d076b3aa6	3369898e-21d8-4ded-8bbc-a746b1a743ad.rna_seq.augmented_star_gene_counts.tsv	4215833	de5312b418ee15ee4d2be3ef8a80236d		Duplicated analysis with later subject aliquot
	TCGA-44-6775	TCGA-44-6775-01C	TCGA-44-6775-01C-02R-A277-07	LUAD	female	b9610938-1f47-4556-ae92-794df8ae6401	a0ead79b-f99c-46d1-a092-4cb98291bdcc.rna_seq.augmented_star_gene_counts.tsv	4226468	868d9748d56a2ca220f558405a3f5bf3	NO_NFE2L2
	TCGA-44-6776	TCGA-44-6776-01A	TCGA-44-6776-01A-11R-1858-07	LUAD	female	736227d9-3cee-40ed-bdec-0e88968ef179	7623e22f-3401-47b3-be94-23f5da20ee0d.rna_seq.augmented_star_gene_counts.tsv	4217863	f1a74a7251cb845a2daba64797c8aabc	KEAP1
	TCGA-44-6777	TCGA-44-6777-01A	TCGA-44-6777-01A-11R-1858-07	LUAD	female	5f4fa91b-489e-4ac9-b685-53952f77bd7a	0bb88c14-58c0-45d8-a8f3-f41840f62d37.rna_seq.augmented_star_gene_counts.tsv	4229070	610bf6cfc175ec826bc898feead50f01	NO_NFE2L2
	TCGA-44-6778	TCGA-44-6778-01A	TCGA-44-6778-01A-11R-1858-07	LUAD	male	c5a1245e-f3c5-4f42-afd6-9b12f01a6445	facd5609-e5f0-4993-bd84-049447d60d32.rna_seq.augmented_star_gene_counts.tsv	4236370	e70ea75b06ab27626863f5d4936813cf	KEAP1
	TCGA-44-6779	TCGA-44-6779-01A	TCGA-44-6779-01A-11R-1858-07	LUAD	female	254bed99-398d-4c34-a804-67516d257e70	c63de407-f025-4939-9633-6550724be88c.rna_seq.augmented_star_gene_counts.tsv	4210733	82f16f580abc01b23457c00bbcd85eb4	KEAP1
	TCGA-44-7659	TCGA-44-7659-01A	TCGA-44-7659-01A-11R-2066-07	LUAD	male	0737eb23-c066-4522-8f5c-dbb4b3b516b0	a0c9ebdf-951b-4d8d-aa79-3ff1c82342cd.rna_seq.augmented_star_gene_counts.tsv	4227073	344cd663e35a9e4746e58f3a92188710	NO_NFE2L2
	TCGA-44-7660	TCGA-44-7660-01A	TCGA-44-7660-01A-11R-2066-07	LUAD	male	d52fa71c-9f59-407e-8481-d0ac47ba88b2	4933c476-e3f3-45b0-b158-dcbe0539644e.rna_seq.augmented_star_gene_counts.tsv	4252077	98591d77bf99c7e5109d1cca4b929839	KEAP1
	TCGA-44-7661	TCGA-44-7661-01A	TCGA-44-7661-01A-11R-2066-07	LUAD	female	906a6a3f-91ce-4433-9a0d-e010a61782f0	f602ef77-0db5-47af-b259-e551c77a4281.rna_seq.augmented_star_gene_counts.tsv	4252552	741de299eaef98ea84c1e276703b1084	NO_NFE2L2
	TCGA-44-7662	TCGA-44-7662-01A	TCGA-44-7662-01A-11R-2066-07	LUAD	male	ea47f0f6-aad1-4149-afb6-2026f64935f5	dd20e202-a63c-4281-85c7-f16096212a91.rna_seq.augmented_star_gene_counts.tsv	4252613	80fe4f8352e37b4b8f763060df073772	NO_NFE2L2
	TCGA-44-7667	TCGA-44-7667-01A	TCGA-44-7667-01A-31R-2066-07	LUAD	female	89bf9c33-c1b4-4786-821f-802cf36eed43	2a53d9f7-430a-45c5-9171-8ee65dc560dd.rna_seq.augmented_star_gene_counts.tsv	4242284	e60e754c99194b675d97bbadf45cce3a	KEAP1
	TCGA-44-7669	TCGA-44-7669-01A	TCGA-44-7669-01A-21R-2066-07	LUAD	male	9ffe8343-d98f-4c5f-b29a-cbcbdac0c008	8536c3c1-1e75-4ebc-b792-30d7d228a117.rna_seq.augmented_star_gene_counts.tsv	4258988	c21ca32afb67a4dab1ec6d808c21afb9	KEAP1
	TCGA-44-7670	TCGA-44-7670-01A	TCGA-44-7670-01A-11R-2066-07	LUAD	female	c69e8ef1-57a7-439a-9b05-66f14b019322	be547f27-5157-4947-ad2a-c9d006dedabd.rna_seq.augmented_star_gene_counts.tsv	4258521	716af72b7c7e06d22067f087ffe74a60	NO_NFE2L2
	TCGA-44-7671	TCGA-44-7671-01A	TCGA-44-7671-01A-11R-2066-07	LUAD	male	1a4c524e-8e75-436e-8ccf-cce6ae3d6eb3	3b5d9bee-5e4f-4afc-b297-2f072ef18a93.rna_seq.augmented_star_gene_counts.tsv	4244216	de619dd185ce4019e4c472a26b761747	KEAP1
	TCGA-44-7672	TCGA-44-7672-01A	TCGA-44-7672-01A-11R-2066-07	LUAD	female	475fdbbb-3d3a-4d56-8d0e-34dfb8cb6346	5f74c5cb-1127-4a5c-975e-58e5abc4db03.rna_seq.augmented_star_gene_counts.tsv	4242000	a2401a616eb79a13863b6f1b63d0d7ed	NO_NFE2L2
	TCGA-44-8117	TCGA-44-8117-01A	TCGA-44-8117-01A-11R-2241-07	LUAD	female	e6543906-a4e3-447c-8040-310979304204	2aef96ea-5379-4066-8df1-66218ab77425.rna_seq.augmented_star_gene_counts.tsv	4251753	c5a6fc54454e07b4b6cf4cc57fdd19c2	NO_NFE2L2
	TCGA-44-8119	TCGA-44-8119-01A	TCGA-44-8119-01A-11R-2241-07	LUAD	male	e585878b-98af-4e3f-b03c-6b5a4e7a202c	45310b76-8ea1-4d13-9d9f-1f1d874e0285.rna_seq.augmented_star_gene_counts.tsv	4261858	09a0a192d9a96a3b004cb9d1c05aefb9	NO_NFE2L2
	TCGA-44-8120	TCGA-44-8120-01A	TCGA-44-8120-01A-11R-2241-07	LUAD	male	78d70b30-8812-4802-bca7-f1b8135b9cbd	db66be89-fb7c-41c3-9a0b-9beae75b7850.rna_seq.augmented_star_gene_counts.tsv	4254576	c23ae4717a1c8bfadf469112a0e6d2cc	NO_NFE2L2
	TCGA-44-A479	TCGA-44-A479-01A	TCGA-44-A479-01A-31R-A24H-07	LUAD	female	850bb68e-cea7-4d66-b044-24dbef74e255	d737cd97-619a-4fc3-9ae2-87e1f4b19beb.rna_seq.augmented_star_gene_counts.tsv	4241058	670bc0043db7dc4624db1eb7a3be77ab	NO_NFE2L2
	TCGA-44-A47A	TCGA-44-A47A-01A	TCGA-44-A47A-01A-21R-A24H-07	LUAD	female	2bbe47a1-f055-43e7-94d3-06aafb5af6e8	4f8b284e-7e42-45c5-b7cc-57cc678ec3df.rna_seq.augmented_star_gene_counts.tsv	4240703	ff5dd71ceb95be5107ecbf1b2ef3f202	NO_NFE2L2
	TCGA-44-A47B	TCGA-44-A47B-01A	TCGA-44-A47B-01A-11R-A24H-07	LUAD	male	ca34be5f-799c-4df4-af91-ec8a9e958d6c	fe770b01-42c9-48c6-97f8-09f18a374350.rna_seq.augmented_star_gene_counts.tsv	4241285	2dc56687d6d13017d3cf28b874be1c46	NO_NFE2L2
	TCGA-44-A47G	TCGA-44-A47G-01A	TCGA-44-A47G-01A-21R-A24H-07	LUAD	female	38ec487d-0a4a-4287-9c14-4bfdb959b402	32675d71-6f79-4b8f-ab7c-e2350b15875c.rna_seq.augmented_star_gene_counts.tsv	4235385	27afb72bae1bc85f4df940514d7490d2	NO_NFE2L2
	TCGA-44-A4SS	TCGA-44-A4SS-01A	TCGA-44-A4SS-01A-11R-A24X-07	LUAD	male	de18a680-86a5-4319-a332-42227d490aa5	61807b4d-bbab-4ea8-a904-35c562ec6c29.rna_seq.augmented_star_gene_counts.tsv	4234851	876fc21be1ad60c90aaf7d515972a3c2	KEAP1
	TCGA-44-A4SU	TCGA-44-A4SU-01A	TCGA-44-A4SU-01A-11R-A24X-07	LUAD	female	5caf3127-967f-4d07-b49d-7126728e2048	1d7be20b-b4ca-47bb-9552-689f2e3ff0f7.rna_seq.augmented_star_gene_counts.tsv	4249339	40c6fe8905f979c9b4741b4ffa69cc6a	NO_NFE2L2
	TCGA-49-4486	TCGA-49-4486-01A	TCGA-49-4486-01A-01R-1206-07	LUAD	male	313f5ae9-bbea-41d6-82d5-9242b2610d91	39af4940-aeba-4d26-96fc-68da8663bc81.rna_seq.augmented_star_gene_counts.tsv	4238643	44d2499fce7ad138505df55418394a0c	KEAP1
	TCGA-49-4487	TCGA-49-4487-01A	TCGA-49-4487-01A-21R-1858-07	LUAD	female	42be8d70-f8a0-49ea-94a9-58e320337843	eecb4e6b-6916-4673-815b-9a5366fe3a86.rna_seq.augmented_star_gene_counts.tsv	4219234	e22a268f8e146bfae970f289026d8f88	NO_NFE2L2
	TCGA-49-4488	TCGA-49-4488-01A	TCGA-49-4488-01A-01R-1755-07	LUAD	female	e824e07e-86cd-43eb-8f36-c60f36194f3c	bae79640-8273-42a2-913e-3d29e00ccc4f.rna_seq.augmented_star_gene_counts.tsv	4218935	6567d9cc847c7cf2e6109e47d0ef4b70	KEAP1
	TCGA-49-4490	TCGA-49-4490-01A	TCGA-49-4490-01A-21R-1858-07	LUAD	female	2f2cc9dc-1d0a-4302-b674-02d56c259ff3	8dc8ccd2-a842-4a48-a8db-007855733fc0.rna_seq.augmented_star_gene_counts.tsv	4222485	2f611c504c268ded62d5f6fb8ae9b629	NO_NFE2L2
	TCGA-49-4494	TCGA-49-4494-01A	TCGA-49-4494-01A-01R-1206-07	LUAD	male	3c0ce8a7-a730-4f1a-9e03-335b3e36849b	e2f47d3a-0e1a-47cb-a53f-697e2a3cb89b.rna_seq.augmented_star_gene_counts.tsv	4244887	809235e19457da6800281acc0056037e	NO_NFE2L2
	TCGA-49-4501	TCGA-49-4501-01A	TCGA-49-4501-01A-01R-1206-07	LUAD	female	8b55c916-963b-41d6-b7ce-7e8ccf958c80	72726dc4-fa08-4e34-9539-29ddb19dd782.rna_seq.augmented_star_gene_counts.tsv	4257037	a885ede54564e2291a817d02e8333ca6	NO_NFE2L2
	TCGA-49-4505	TCGA-49-4505-01A	TCGA-49-4505-01A-01R-1206-07	LUAD	female	b91d8293-6331-4f76-98f0-335ebce83539	330845b9-1d53-47af-8cb7-30ce5d30625d.rna_seq.augmented_star_gene_counts.tsv	4253457	5747ecf21d5548f4096ea86156030475	NO_NFE2L2
	TCGA-49-4506	TCGA-49-4506-01A	TCGA-49-4506-01A-01R-1206-07	LUAD	female	614afd6a-05ff-4914-896c-3ac4280e510d	7ec16b5a-7a86-4a22-9f1c-74d42ab1f43d.rna_seq.augmented_star_gene_counts.tsv	4234395	8ef2fa7352a300b991cc0f7e3a71c8e1	KEAP1
	TCGA-49-4507	TCGA-49-4507-01A	TCGA-49-4507-01A-01R-1206-07	LUAD	female	43b8c3f7-2d0b-4020-807d-b7386825ecc0	c6acc762-3909-4cc0-91c7-f66bc3f0e667.rna_seq.augmented_star_gene_counts.tsv	4242811	3a3f0631a5920fc99affb4599220c8ff	KEAP1
	TCGA-49-4510	TCGA-49-4510-01A	TCGA-49-4510-01A-01R-1206-07	LUAD	female	951f2356-17f4-4f4f-a8ec-855c7e93dce1	7eab2708-6708-4f8e-b238-e06007754e7e.rna_seq.augmented_star_gene_counts.tsv	4254332	9837dd0bdde68bbcbf072e4cc44d3532	NO_NFE2L2
	TCGA-49-4512	TCGA-49-4512-01A	TCGA-49-4512-01A-21R-1858-07	LUAD	female	e20ecad8-f22d-4e2d-99af-bc1be98c5128	085fd4df-27f7-4680-a0b5-8726f9eab370.rna_seq.augmented_star_gene_counts.tsv	4222449	132f5101f360a88ccfd95d9e99d7f3bb	NO_NFE2L2
	TCGA-49-4514	TCGA-49-4514-01A	TCGA-49-4514-01A-21R-1858-07	LUAD	female	85c794c1-3fd0-4a10-a613-9db7eff3c78f	2f03d42e-9735-4edb-87d9-ec443b7801a5.rna_seq.augmented_star_gene_counts.tsv	4215638	0cca0b7b820d604efba1b44160f95826	KEAP1
	TCGA-49-6742	TCGA-49-6742-01A	TCGA-49-6742-01A-11R-1858-07	LUAD	male	a03c9de0-7526-4942-8a7a-5fe03ea191f6	3ce23908-d2b9-42b0-a409-5fbd767496c2.rna_seq.augmented_star_gene_counts.tsv	4225761	733ac10a0be01831a6086753e86afd82	KEAP1
	TCGA-49-6743	TCGA-49-6743-01A	TCGA-49-6743-01A-11R-1858-07	LUAD	female	e9d3cac1-3a16-4e21-8fe8-a4944ce82cb8	e127acf3-0757-4f24-aff7-0fbe7283b9ed.rna_seq.augmented_star_gene_counts.tsv	4236769	170f3279dc7c199d7a65f88fac702997	KEAP1
	TCGA-49-6744	TCGA-49-6744-01A	TCGA-49-6744-01A-11R-1858-07	LUAD	female	1876b908-e911-464f-be23-2b4eae0a43b6	6efebff1-f165-415e-9001-45a782638785.rna_seq.augmented_star_gene_counts.tsv	4237227	69ab93a934179bda2077ed5915cc637a	NO_NFE2L2
	TCGA-49-6745	TCGA-49-6745-01A	TCGA-49-6745-01A-11R-1858-07	LUAD	male	9db8b103-5f3a-439b-993c-14879744c30a	7f9b4506-b00b-4b6f-8469-d0e4a73df1d4.rna_seq.augmented_star_gene_counts.tsv	4231950	ce4a992807ad6e324027faca1177ba8d	NO_NFE2L2
	TCGA-49-6761	TCGA-49-6761-01A	TCGA-49-6761-01A-31R-1949-07	LUAD	female	5b99d571-43d2-4d26-9a3b-0a299a0ce048	60cc41cd-a0af-4cad-a4be-253781e2f0b8.rna_seq.augmented_star_gene_counts.tsv	4222207	8b62fcc48ef1b4143da81fe3b74cf6dd	NO_NFE2L2
	TCGA-49-6767	TCGA-49-6767-01A	TCGA-49-6767-01A-11R-1858-07	LUAD	female	38cc1ced-6874-4aed-ab73-8c6344564cd6	d0f1d923-1014-4a12-824b-9939fd75f9b1.rna_seq.augmented_star_gene_counts.tsv	4224864	2989a65bbd9f6f15884be052ebdbf828	NO_NFE2L2
	TCGA-49-AAQV	TCGA-49-AAQV-01A	TCGA-49-AAQV-01A-11R-A39D-07	LUAD	female	d05a80fc-d08a-47df-b7cd-0172b9977d46	38fbb0e8-cd18-425d-becf-791c8e8a8911.rna_seq.augmented_star_gene_counts.tsv	4255536	bf467fb87a0431608932b9b41be6d157	NO_NFE2L2
	TCGA-49-AAR0	TCGA-49-AAR0-01A	TCGA-49-AAR0-01A-21R-A39D-07	LUAD	male	cc640c34-516e-4cd8-a32c-d6f9b856696d	57512aba-e397-4ab8-b1ed-de197e6f92fd.rna_seq.augmented_star_gene_counts.tsv	4245803	6e514737bc74c82deab0fc4b1d6649c5	KEAP1
	TCGA-49-AAR2	TCGA-49-AAR2-01A	TCGA-49-AAR2-01A-11R-A39D-07	LUAD	male	e37ffff5-f795-4ca9-b46b-f59344db48af	4a967e6f-d39a-4fe5-864b-a43e8184a852.rna_seq.augmented_star_gene_counts.tsv	4234038	23df6c2e935e17fc100e4aee7fcccb4b	KEAP1
	TCGA-49-AAR3	TCGA-49-AAR3-01A	TCGA-49-AAR3-01A-11R-A41B-07	LUAD	male	842cb3d6-6ca5-4924-a7bb-98720352b548	0ba8665b-be52-4288-838a-8f5d189f809d.rna_seq.augmented_star_gene_counts.tsv	4218305	203bcd9ab4efdad03d8b9a84c5353a3c	KEAP1
	TCGA-49-AAR4	TCGA-49-AAR4-01A	TCGA-49-AAR4-01A-12R-A41B-07	LUAD	male	3ceb828a-3612-46e8-89c5-397cb20e5356	f1eb1ef7-fe25-4dd8-abed-9d9c298d72fb.rna_seq.augmented_star_gene_counts.tsv	4236425	c2c75dc4e39ae5732e10b50ab93bfd61	NO_NFE2L2
	TCGA-49-AAR9	TCGA-49-AAR9-01A	TCGA-49-AAR9-01A-21R-A41B-07	LUAD	male	1bcb7da3-a08e-4f9d-a960-fe7bdfe4222c	7edd63ce-c5bb-4209-b8c8-98af0fae03ed.rna_seq.augmented_star_gene_counts.tsv	4230598	be54ea976ef2973cbe4920dea64398de	KEAP1
	TCGA-49-AARE	TCGA-49-AARE-01A	TCGA-49-AARE-01A-11R-A41B-07	LUAD	female	4089d037-ab25-47a6-be68-19742473cbc6	50c308c9-922a-4083-ae09-e5e4d8c437af.rna_seq.augmented_star_gene_counts.tsv	4242766	168c5577e8da0154d7e4a2d823f394c2	KEAP1
	TCGA-49-AARN	TCGA-49-AARN-01A	TCGA-49-AARN-01A-21R-A41B-07	LUAD	female	119e7a6c-7fd1-4a2d-bfdc-35cb13d39414	6460f151-7102-476d-b03b-fb4ea776b1ea.rna_seq.augmented_star_gene_counts.tsv	4228464	a60197ff9046416f7a5a6834377e84d8	NO_NFE2L2
	TCGA-49-AARO	TCGA-49-AARO-01A	TCGA-49-AARO-01A-12R-A41B-07	LUAD	female	3ca2ec6c-4134-4595-9c5e-68c886d3aa1c	f6108b9b-e02f-4608-bec3-bcc0112d05b4.rna_seq.augmented_star_gene_counts.tsv	4240841	8d70fb7de797f3f7d797203584e1d909	NO_NFE2L2
	TCGA-49-AARQ	TCGA-49-AARQ-01A	TCGA-49-AARQ-01A-11R-A41B-07	LUAD	female	82a68e91-48cc-400b-8520-4abcbff1a163	03c7ece7-500d-4c38-a600-bd6863562bfd.rna_seq.augmented_star_gene_counts.tsv	4233176	d35499e9d55944014e6e01c72f049d36	NO_NFE2L2
	TCGA-49-AARR	TCGA-49-AARR-01A	TCGA-49-AARR-01A-11R-A41B-07	LUAD	male	05fa4573-6ca5-40dc-a48b-ec847b7c58ad	58681163-9f9d-4f74-a1bb-3a4bcb4856d6.rna_seq.augmented_star_gene_counts.tsv	4245763	a36c04c9b3f5b2f14310a3920abe82f9	NO_NFE2L2
	TCGA-4B-A93V	TCGA-4B-A93V-01A	TCGA-4B-A93V-01A-11R-A39D-07	LUAD	female	dcff773b-20f4-4c90-9a3f-78ef2e0f484e	3041806b-5855-4930-aeb8-a30472658d54.rna_seq.augmented_star_gene_counts.tsv	4236778	26c47e66aad388095d9f79563830c366	KEAP1
	TCGA-50-5044	TCGA-50-5044-01A	TCGA-50-5044-01A-21R-1858-07	LUAD	female	db61f20e-e44a-4992-a9f6-b54fc2dedfb6	e789fc5c-1218-4f07-ba95-b54d8fb93e7b.rna_seq.augmented_star_gene_counts.tsv	4213405	f3b18a5a98c462c45eddbf72e1fad7d5	NO_NFE2L2
	TCGA-50-5045	TCGA-50-5045-01A	TCGA-50-5045-01A-01R-1628-07	LUAD	female	e4bb1f41-bf42-43f3-aba5-98f3a02a7e03	aa2d6144-50d3-4096-9ecf-3cc0ceac7f41.rna_seq.augmented_star_gene_counts.tsv	4244263	c297cdc63b9bfaf4d020bd36773631ed	NO_NFE2L2
	TCGA-50-5049	TCGA-50-5049-01A	TCGA-50-5049-01A-01R-1628-07	LUAD	male	3361d7bc-344b-44b2-97bd-ac0dc79b221f	56afb18f-7fdd-4672-be59-4d3a03b806de.rna_seq.augmented_star_gene_counts.tsv	4228505	b0580f5383836d0a4eedecbca2afcc18	NO_NFE2L2
	TCGA-50-5051	TCGA-50-5051-01A	TCGA-50-5051-01A-21R-1858-07	LUAD	female	929473bf-434c-438e-b16c-c34bfb0b98ea	cbf298e2-94bb-48c9-ae07-408081055497.rna_seq.augmented_star_gene_counts.tsv	4225602	3a173e4bcea95466609b76c19454dc83	KEAP1
	TCGA-50-5055	TCGA-50-5055-01A	TCGA-50-5055-01A-01R-1628-07	LUAD	female	fdcad604-c1b4-40ff-a652-3c1e5fe5f9a1	2301103f-5cbe-4cb6-b5da-0b83b39e4616.rna_seq.augmented_star_gene_counts.tsv	4221999	b1e1c46c723cd8d97d6448d933348b53	NO_NFE2L2
	TCGA-50-5066	TCGA-50-5066-01A	TCGA-50-5066-01A-01R-1628-07	LUAD	male	cb6a3198-2662-4150-bee9-51b692968209	c6dd2eb6-2297-4dc0-8cae-c7a6b733a1c2.rna_seq.augmented_star_gene_counts.tsv	4217663	644b65b26d1f69356dfc3abe47adb4ab	NO_NFE2L2
	TCGA-50-5068	TCGA-50-5068-01A	TCGA-50-5068-01A-01R-1628-07	LUAD	female	6d4fc521-df92-4d04-8118-d363ac31bfa8	868157f2-85e5-462c-9994-1e50791ad2c0.rna_seq.augmented_star_gene_counts.tsv	4218313	85dec422ecf0bdf4dee8cea4f416ffca	KEAP1
	TCGA-50-5072	TCGA-50-5072-01A	TCGA-50-5072-01A-21R-1858-07	LUAD	male	148c1368-6302-4daf-b389-2c92f5da0529	55e5447a-96d1-4d95-91ad-b5790392bbfa.rna_seq.augmented_star_gene_counts.tsv	4244412	2a633030c69715c42c8cb8c04e768a74	NO_NFE2L2
	TCGA-50-5930	TCGA-50-5930-01A	TCGA-50-5930-01A-11R-1755-07	LUAD	male	df504497-a30e-4a11-a62f-dcb46e741dfb	22c48da7-f220-43f4-a1b0-fd57358f7ae7.rna_seq.augmented_star_gene_counts.tsv	4206146	730d6953bb60933cf218ba881a93bfa6	NO_NFE2L2
	TCGA-50-5931	TCGA-50-5931-01A	TCGA-50-5931-01A-11R-1755-07	LUAD	female	69933ac8-e7a7-43b6-8231-2ecb35f88d52	c9d8385a-9f73-48f9-bca4-1c0647881bfd.rna_seq.augmented_star_gene_counts.tsv	4235050	8eafe6fede10733417326ed7b3e61f12	NO_NFE2L2
	TCGA-50-5932	TCGA-50-5932-01A	TCGA-50-5932-01A-11R-1755-07	LUAD	male	b080156e-0711-42f5-83c7-a34de25cbba9	fe3a5a49-7744-4336-a4b6-0e88f23e21d8.rna_seq.augmented_star_gene_counts.tsv	4233140	15220c8a957b906fb33769b1b0e65227	NO_NFE2L2
	TCGA-50-5933	TCGA-50-5933-01A	TCGA-50-5933-01A-11R-1755-07	LUAD	male	a412b415-0692-4adf-8447-067ad69913d7	fcb42a31-a716-430f-a0a1-001766fc62b5.rna_seq.augmented_star_gene_counts.tsv	4228758	fd911ac5bbe78ead902c93f526838477	NO_NFE2L2
	TCGA-50-5935	TCGA-50-5935-01A	TCGA-50-5935-01A-11R-1755-07	LUAD	female	d3d249ab-0483-4e9c-99f3-07afb5b6dabc	73babed8-f934-42c7-9020-30f7c3e1766d.rna_seq.augmented_star_gene_counts.tsv	4229288	4239402935c3e36a01b087de299eccb3	NO_NFE2L2
	TCGA-50-5936	TCGA-50-5936-01A	TCGA-50-5936-01A-11R-1628-07	LUAD	male	055fcce9-7448-4a16-ad18-d235dac7ce97	b95a1889-2ef5-4da3-b5e9-14b678c4d71a.rna_seq.augmented_star_gene_counts.tsv	4220504	e377ff197e805d9c7486d7285f9e12af	KEAP1
	TCGA-50-5939	TCGA-50-5939-01A	TCGA-50-5939-01A-11R-1628-07	LUAD	male	8148f34c-1ddd-454a-8761-8b76e97e8534	4a39a182-e583-4ff0-a8f0-f73b0f5c4f20.rna_seq.augmented_star_gene_counts.tsv	4221589	4b5d514b2aa04892b35a766af78e6ea7	KEAP1
	TCGA-50-5941	TCGA-50-5941-01A	TCGA-50-5941-01A-11R-1755-07	LUAD	female	27450388-ffc7-4812-b5b4-9819b0a74a0b	7b07706f-a1b4-4f18-a276-0822b578cc40.rna_seq.augmented_star_gene_counts.tsv	4226093	0647cf8783a26fa5ca57eaaefedc2b3c	NO_NFE2L2
	TCGA-50-5942	TCGA-50-5942-01A	TCGA-50-5942-01A-21R-1755-07	LUAD	female	361e4878-4535-499d-9987-7295a078bbee	ab0a7727-00ee-40fa-b5f5-a69234473e4a.rna_seq.augmented_star_gene_counts.tsv	4229669	fd1f51878ed84fdfd1735a05eaab6169	NO_NFE2L2
	TCGA-50-5944	TCGA-50-5944-01A	TCGA-50-5944-01A-11R-1755-07	LUAD	female	36e8195f-72b1-4d87-9be5-a487689aba5e	772dcecf-b53d-42e2-8161-f48030150aa0.rna_seq.augmented_star_gene_counts.tsv	4227299	affdba1a9df80361e58c50109bbc81d0	NO_NFE2L2
	TCGA-50-5946	TCGA-50-5946-01A	TCGA-50-5946-01A-11R-1755-07	LUAD	male	caa4bc15-6e54-4d5e-9d91-c25e800b71b9	c36d8349-6af1-4583-818d-cd3742ea97a7.rna_seq.augmented_star_gene_counts.tsv	4258625	375d57254b6abd5becaf6a601e11d6e2	NO_NFE2L2
	TCGA-50-6590	TCGA-50-6590-01A	TCGA-50-6590-01A-12R-1858-07	LUAD	female	8e510682-b05c-4792-a149-d713db6d082d	fbb4d953-39c3-4e94-a99c-a8927421709e.rna_seq.augmented_star_gene_counts.tsv	4231087	d891688f21082475033c26e298d59b7c	NO_NFE2L2
	TCGA-50-6591	TCGA-50-6591-01A	TCGA-50-6591-01A-11R-1755-07	LUAD	female	41e96482-bc24-4a1a-8ef2-8ef4d525ad40	52e52b5d-4112-4616-8ddd-2a4524a91778.rna_seq.augmented_star_gene_counts.tsv	4227608	51fa05e5b8db6567c1f54ed18878ffd2	NO_NFE2L2
	TCGA-50-6592	TCGA-50-6592-01A	TCGA-50-6592-01A-11R-1755-07	LUAD	female	371fd35f-eb3c-4346-8197-8ecf4c9ce220	27266d85-3f2c-489f-9e5d-663d94ae9f55.rna_seq.augmented_star_gene_counts.tsv	4244098	c470529c2f24cb343aa091a3830e091b	NO_NFE2L2
	TCGA-50-6593	TCGA-50-6593-01A	TCGA-50-6593-01A-11R-1755-07	LUAD	female	ce886e9b-2167-486f-8d8a-d4fec39d86c9	8a44c8a0-142b-48bb-9809-69914811bacc.rna_seq.augmented_star_gene_counts.tsv	4229964	f69b8a27e433a9bd6ea09a17037bf287	NO_NFE2L2
	TCGA-50-6594	TCGA-50-6594-01A	TCGA-50-6594-01A-11R-1755-07	LUAD	female	f7c8bdd7-48f6-4ecd-a4ae-78ffcb2fb28d	3e08ac76-9fba-40cf-8743-e2e1fb14f067.rna_seq.augmented_star_gene_counts.tsv	4221778	4cd0279e8685095a42f2428c471de77f	NO_NFE2L2
	TCGA-50-6595	TCGA-50-6595-01A	TCGA-50-6595-01A-12R-1858-07	LUAD	female	0e9c2659-4131-4274-b0b4-3e191239f5f3	29000c50-6667-4281-a97a-5f02cb24a8f4.rna_seq.augmented_star_gene_counts.tsv	4223489	c212fbcd1096dfdda2d62f47fb9baec0	NO_NFE2L2
	TCGA-50-6597	TCGA-50-6597-01A	TCGA-50-6597-01A-11R-1858-07	LUAD	female	f6582ef5-5f6d-41d7-850a-614257c9e3b2	555b77b9-d686-4f0e-a099-25bd5715a5e9.rna_seq.augmented_star_gene_counts.tsv	4213848	5973bc51a6a328042482da09d2d9465d	NO_NFE2L2
	TCGA-50-6673	TCGA-50-6673-01A	TCGA-50-6673-01A-11R-1949-07	LUAD	female	404b3699-4707-49aa-b0d2-a0999bbd48e6	2e86db3a-ac57-49d2-8378-5d5e7412eff7.rna_seq.augmented_star_gene_counts.tsv	4233930	24499c77513eab13273753274fadac95	NO_NFE2L2
	TCGA-50-7109	TCGA-50-7109-01A	TCGA-50-7109-01A-11R-2039-07	LUAD	male	e173308d-ac80-4c15-9b0e-e5cb09321a56	b99ff949-1922-4948-8d02-2ef2aa3dfb3b.rna_seq.augmented_star_gene_counts.tsv	4235077	125698e68f5d06c70df63593977e5607	NO_NFE2L2
	TCGA-50-8457	TCGA-50-8457-01A	TCGA-50-8457-01A-11R-2326-07	LUAD	female	12c95903-cae1-4f9f-97c7-05ab05f4fd7f	1205cc6a-c42f-44c8-bf1c-84ef49eaaee4.rna_seq.augmented_star_gene_counts.tsv	4242426	354d2e7bb6af24532f017206063239a9	NO_NFE2L2
	TCGA-50-8459	TCGA-50-8459-01A	TCGA-50-8459-01A-11R-2326-07	LUAD	male	cfac28bf-001d-4db8-942a-d244f93139a7	1aa0401e-b389-4852-87ef-e1ae357b76dc.rna_seq.augmented_star_gene_counts.tsv	4235244	e17d1cfcf70f857f065627ce9e07a143	NO_NFE2L2
	TCGA-50-8460	TCGA-50-8460-01A	TCGA-50-8460-01A-11R-2326-07	LUAD	male	3d6cb261-d0c4-4e98-8918-d7d678cb97ae	d94a4acc-1345-4cdb-b1e0-0b9c1afc593c.rna_seq.augmented_star_gene_counts.tsv	4229614	33c2b82cfb176e1f0a2e14e9b7fe42e6	NO_NFE2L2
	TCGA-53-7624	TCGA-53-7624-01A	TCGA-53-7624-01A-11R-2066-07	LUAD	female	1120d776-47df-4f72-862e-427d3c44dd43	ec99ae0d-704e-481d-bc90-7b553075a845.rna_seq.augmented_star_gene_counts.tsv	4241608	62306b327ba0a501e400fd14bf90b357	KEAP1
	TCGA-53-7626	TCGA-53-7626-01A	TCGA-53-7626-01A-12R-2066-07	LUAD	female	f8670621-43a9-491c-81b7-8999ca9975a7	9b4a912b-c42b-4a3a-8723-58b4dcb85949.rna_seq.augmented_star_gene_counts.tsv	4257735	7923c2b114babb1a7a4628121c3bb2ff	NO_NFE2L2
	TCGA-53-7813	TCGA-53-7813-01A	TCGA-53-7813-01A-11R-2170-07	LUAD	female	9835daf0-92cc-4237-838d-b122a15aa1f1	dad295e6-b4f8-4ad1-8439-acc3f903cfb0.rna_seq.augmented_star_gene_counts.tsv	4212510	ad4404bac2770b4fba3453695cc0b5b2	NO_NFE2L2
	TCGA-53-A4EZ	TCGA-53-A4EZ-01A	TCGA-53-A4EZ-01A-12R-A24X-07	LUAD	male	360ebab8-859c-4286-b613-befa0fa306f0	ecef82f6-3009-4345-a56d-d028535d78fd.rna_seq.augmented_star_gene_counts.tsv	4243764	021cfd0b440d454b17b7b0d10c139349	KEAP1
	TCGA-55-1592	TCGA-55-1592-01A	TCGA-55-1592-01A-01R-0946-07	LUAD	male	b9ac77d6-9a1b-443d-8ef5-e8ef2e3008dd	6f6bf240-1ca4-47d0-9a77-17b0ce9b8ae7.rna_seq.augmented_star_gene_counts.tsv	4264851	11bcef36ba61bd2bf27d9c24b968c510	NO_NFE2L2
	TCGA-55-1594	TCGA-55-1594-01A	TCGA-55-1594-01A-01R-0946-07	LUAD	male	9ffe0bdc-838e-4715-8fd3-31f032c8f46e	96f7dff7-660b-4700-88b3-6479ad02f20c.rna_seq.augmented_star_gene_counts.tsv	4245852	5625ab3cfe5ea5e0552b8886e9377372	NO_NFE2L2
	TCGA-55-1595	TCGA-55-1595-01A	TCGA-55-1595-01A-01R-0946-07	LUAD	female	aabb1f03-8a4e-4d38-b09e-d9b56b5b921c	f8cc4515-2576-4a72-9cf1-28dfe774eda9.rna_seq.augmented_star_gene_counts.tsv	4257091	52fff028a9744532f9c134b9cc53037e	NO_NFE2L2
	TCGA-55-1596	TCGA-55-1596-01A	TCGA-55-1596-01A-01R-0946-07	LUAD	male	e6b0ab3e-2b95-4803-91f8-cfa385fe0386	921aa14f-d674-4ecf-b4fd-ca846acc9fa3.rna_seq.augmented_star_gene_counts.tsv	4231722	66d353dfbf558ff92bdf9613201a1dc2	NO_NFE2L2
	TCGA-55-5899	TCGA-55-5899-01A	TCGA-55-5899-01A-11R-1628-07	LUAD	male	7a3f27a9-476d-43e2-abb8-db402f80dfcf	9ba0ff4b-4276-45ee-a543-a2e837777923.rna_seq.augmented_star_gene_counts.tsv	4230618	766e34e9da73695da4e71aece82960fd	KEAP1
	TCGA-55-6543	TCGA-55-6543-01A	TCGA-55-6543-01A-11R-1755-07	LUAD	female	cb93a89c-f291-4042-a988-0fb1b392e4d7	4102816c-2ab8-4ecb-83b0-4f78c052bcd8.rna_seq.augmented_star_gene_counts.tsv	4229128	dedf19999ef78fc8c2c60e835ed0198b	NO_NFE2L2
	TCGA-55-6642	TCGA-55-6642-01A	TCGA-55-6642-01A-11R-1858-07	LUAD	male	40e350a6-fda3-43ff-9405-bda7a7c534ae	d7c787e0-6416-4724-8954-85467906f90d.rna_seq.augmented_star_gene_counts.tsv	4224067	07bcf9b9b19f06f02ae924c400f37152	NO_NFE2L2
	TCGA-55-6712	TCGA-55-6712-01A	TCGA-55-6712-01A-11R-1858-07	LUAD	male	dba9c344-546c-49db-91df-abd25ae4b0cc	91181a9c-3113-47b6-8d1c-8173f9eac675.rna_seq.augmented_star_gene_counts.tsv	4221235	1209dda28577eb250101332233853261	NO_NFE2L2
	TCGA-55-6968	TCGA-55-6968-01A	TCGA-55-6968-01A-11R-1949-07	LUAD	male	883bbed6-0216-48c2-9694-5dba83ce65c7	af407c3f-2dad-4fb9-850e-4a79b361589b.rna_seq.augmented_star_gene_counts.tsv	4233751	d19a4ab3b293c1bedf7ad79fd796dad1	NO_NFE2L2
	TCGA-55-6969	TCGA-55-6969-01A	TCGA-55-6969-01A-11R-1949-07	LUAD	male	45d4b468-9089-46fd-8b5e-ad80a5148abd	6e2e3178-73ad-4590-a56b-bb7fd9984acd.rna_seq.augmented_star_gene_counts.tsv	4251058	793334bac3ad933f56e75de2b5cccf81	NO_NFE2L2
	TCGA-55-6970	TCGA-55-6970-01A	TCGA-55-6970-01A-11R-1949-07	LUAD	female	9bf51961-c60a-43df-87eb-a64dae9e4e10	52beaa60-92f3-48cf-a695-78bb66ccd4f6.rna_seq.augmented_star_gene_counts.tsv	4245175	178a1bafa3baf212e8d0ac4e73c478ff	KEAP1
	TCGA-55-6971	TCGA-55-6971-01A	TCGA-55-6971-01A-11R-1949-07	LUAD	female	d72c21fe-ff33-4f1e-a138-420968f1daf4	89bcf4e2-f855-4035-bf0d-fe4917248223.rna_seq.augmented_star_gene_counts.tsv	4226217	172d4f3390be50f967ab76bd36e2f9bd	NO_NFE2L2
	TCGA-55-6972	TCGA-55-6972-01A	TCGA-55-6972-01A-11R-1949-07	LUAD	male	68b00cb6-4335-4c64-a3e0-0c29ed574480	5418228b-cfd0-4580-87c6-3ebf6282ad73.rna_seq.augmented_star_gene_counts.tsv	4211769	fbabeebae2266a15dd0d21fc71796c93	KEAP1
	TCGA-55-6975	TCGA-55-6975-01A	TCGA-55-6975-01A-11R-1949-07	LUAD	male	385d903b-bab4-4c2e-8334-3a304d1a56fa	f05d253b-7b64-4ecc-8249-55392326a91d.rna_seq.augmented_star_gene_counts.tsv	4217558	fc24531e9defdd925283193b80380612	NFE2L2
	TCGA-55-6978	TCGA-55-6978-01A	TCGA-55-6978-01A-11R-1949-07	LUAD	male	deddc259-f962-468a-bfcf-60da1e695833	d34f0d3c-a058-4569-a8c8-380ada182e76.rna_seq.augmented_star_gene_counts.tsv	4248771	6af5bf4748e870fd24ec95a64192037d	NO_NFE2L2
	TCGA-55-6979	TCGA-55-6979-01A	TCGA-55-6979-01A-11R-1949-07	LUAD	female	765f26d4-120a-459d-90c7-74a8532b407c	fa7777c7-e04a-41db-9ade-0c875c62411f.rna_seq.augmented_star_gene_counts.tsv	4228472	6f458d0bdc6812915432f06e1019dd20	NO_NFE2L2
	TCGA-55-6980	TCGA-55-6980-01A	TCGA-55-6980-01A-11R-1949-07	LUAD	male	4b11527c-fb98-4ad4-aaac-6f0c6c1d185c	78e95f3e-1067-48a8-9429-dfdd6f587066.rna_seq.augmented_star_gene_counts.tsv	4219964	6d0cc74da5bd27143b1a5fce6fbeeee5	NO_NFE2L2
	TCGA-55-6981	TCGA-55-6981-01A	TCGA-55-6981-01A-11R-1949-07	LUAD	female	a777fb14-4498-4f32-bccb-1e8521567302	96780e00-b519-4bec-a49b-c2cc2d19a744.rna_seq.augmented_star_gene_counts.tsv	4216161	6d7026d174217106f4ba9a89afc59647	NO_NFE2L2
	TCGA-55-6982	TCGA-55-6982-01A	TCGA-55-6982-01A-11R-1949-07	LUAD	female	5c32fbb8-55ee-4bc9-a0db-d8ac0b04bdc4	4966ebc7-b3d5-49d1-885d-f6ae4a8781e6.rna_seq.augmented_star_gene_counts.tsv	4220045	c5144e55397649f3223f805b5d73d5d5	NO_NFE2L2
	TCGA-55-6983	TCGA-55-6983-01A	TCGA-55-6983-01A-11R-1949-07	LUAD	male	26c96b62-02b6-4108-9a2d-bec3d880db2a	b573a788-d117-48b0-9cab-c4ecbde82706.rna_seq.augmented_star_gene_counts.tsv	4254025	660142b9835fcffcba5185caba0fb9c0	NO_NFE2L2
	TCGA-55-6984	TCGA-55-6984-01A	TCGA-55-6984-01A-11R-1949-07	LUAD	female	09296d1f-9877-438d-96d8-7b4cc52940dd	49932944-ad54-4c6c-affc-08a4b76de933.rna_seq.augmented_star_gene_counts.tsv	4217774	d9a028d0e2e6a3aff7c833c7e73199be	NO_NFE2L2
	TCGA-55-6985	TCGA-55-6985-01A	TCGA-55-6985-01A-11R-1949-07	LUAD	female	40dba5d9-ce2e-483b-b4a7-19fbca8158e5	dc3ac0d3-d862-4761-ac12-60bb4d6758c1.rna_seq.augmented_star_gene_counts.tsv	4228652	9a694d0d5914d8e5193fd1f5f60ca4d8	NO_NFE2L2
	TCGA-55-6986	TCGA-55-6986-01A	TCGA-55-6986-01A-11R-1949-07	LUAD	female	ad6ae9d2-c6f5-4686-9b3c-45ea130493f3	2fde57cd-97d2-492d-b37d-a4e2d43239cf.rna_seq.augmented_star_gene_counts.tsv	4223654	526f83fd0fa0a2130fd04c8103af23f5	NO_NFE2L2
	TCGA-55-6987	TCGA-55-6987-01A	TCGA-55-6987-01A-11R-1949-07	LUAD	male	1860869f-ecb5-43ae-9714-328ff5748c2a	b57cc3e6-9017-48b7-9de9-74fe57d9bf6d.rna_seq.augmented_star_gene_counts.tsv	4255315	a515e535c4089d239c9ec3ab7b071b32	KEAP1
	TCGA-55-7227	TCGA-55-7227-01A	TCGA-55-7227-01A-11R-2039-07	LUAD	male	47fc2fd2-84ce-49e2-8481-407d7a639042	ef11ddff-02bb-44e2-ab77-fadde20acd87.rna_seq.augmented_star_gene_counts.tsv	4232239	f374fb2cc687a42ba2c41ee20ceb0684	NO_NFE2L2
	TCGA-55-7281	TCGA-55-7281-01A	TCGA-55-7281-01A-11R-2039-07	LUAD	female	7f67633b-3eba-4891-94aa-b3e38f6927ae	acbeca74-24ec-4e54-98e6-d3f59475dde9.rna_seq.augmented_star_gene_counts.tsv	4229430	68f224b4f8fa9a7750f70100bb534b5e	NO_NFE2L2
	TCGA-55-7283	TCGA-55-7283-01A	TCGA-55-7283-01A-11R-2039-07	LUAD	female	cce2b6af-bff9-4ad0-805d-b32aa6fae985	98a4b8cc-fd54-454c-adcd-6fe9ae159a3b.rna_seq.augmented_star_gene_counts.tsv	4233398	9085784f862f100407194d1c8cd177b9	NO_NFE2L2
	TCGA-55-7284	TCGA-55-7284-01B	TCGA-55-7284-01B-11R-2241-07	LUAD	male	75719c78-9935-40e0-bd30-1f8eec34badf	74aaf5e2-be23-49b1-b694-3a3dde306a5d.rna_seq.augmented_star_gene_counts.tsv	4254844	c92e56274fc2cad8f4eebcc650dfd214	NO_NFE2L2
	TCGA-55-7570	TCGA-55-7570-01A	TCGA-55-7570-01A-11R-2039-07	LUAD	male	334cc9fa-3e9b-4462-b84d-dc595e89d537	49acc5ad-6a61-41e1-9acb-4260e932a184.rna_seq.augmented_star_gene_counts.tsv	4242279	3f0751b58efdb8a96a158b5d8ae5b61a	NO_NFE2L2
	TCGA-55-7573	TCGA-55-7573-01A	TCGA-55-7573-01A-11R-2039-07	LUAD	female	4f00f94a-f0db-4840-a230-3bc9866bc184	ff298d6f-071c-417a-acbe-a9ff38494f87.rna_seq.augmented_star_gene_counts.tsv	4234252	b725ce882c43e0bec66f28de9986718c	NO_NFE2L2
	TCGA-55-7574	TCGA-55-7574-01A	TCGA-55-7574-01A-11R-2039-07	LUAD	female	d3986831-ba2a-4a25-8eb0-b074cbd7edac	e270dd9d-4a6b-40b3-823f-a46dd9493585.rna_seq.augmented_star_gene_counts.tsv	4228232	a7d4ccf095f534b06be42af704a95681	NO_NFE2L2
	TCGA-55-7576	TCGA-55-7576-01A	TCGA-55-7576-01A-11R-2066-07	LUAD	male	458042ad-bec8-4433-80da-70f517a440f7	25a6fe1b-0472-489f-a721-f596395badb1.rna_seq.augmented_star_gene_counts.tsv	4255526	bbedd91fbaa3ea10504bcfe4ae3b89dc	NO_NFE2L2
	TCGA-55-7724	TCGA-55-7724-01A	TCGA-55-7724-01A-11R-2170-07	LUAD	female	69e97c5b-4c8a-4710-a0f6-48ebfd917f5a	af276b15-2dc4-4724-bbf5-1be8224b7f73.rna_seq.augmented_star_gene_counts.tsv	4214387	a52ccf5219e9acd92ddebf65affe68e2	NO_NFE2L2
	TCGA-55-7725	TCGA-55-7725-01A	TCGA-55-7725-01A-11R-2170-07	LUAD	female	6ac6539b-76a3-4b1c-8da3-6d621308454a	f3d482bb-14e8-4569-bee4-22d7d2a027ea.rna_seq.augmented_star_gene_counts.tsv	4213184	6f7def999c58d9701e5fafea74cf01a4	NO_NFE2L2
	TCGA-55-7726	TCGA-55-7726-01A	TCGA-55-7726-01A-11R-2170-07	LUAD	female	9711a58c-08fc-428f-93a1-3d3db7df213e	74ab82a4-a55b-4e4c-b3f5-1f9317860914.rna_seq.augmented_star_gene_counts.tsv	4213760	a59dab2bd8d4e8abe3058feb9740fd75	NO_NFE2L2
	TCGA-55-7727	TCGA-55-7727-01A	TCGA-55-7727-01A-11R-2170-07	LUAD	male	3563bce2-6547-4081-883e-1e7e498c83be	59e8b7b7-5183-4655-aa5e-e4b5ba73eded.rna_seq.augmented_star_gene_counts.tsv	4217198	f31fdad9c9382c6c9983bfb59b11fb5e	NO_NFE2L2
	TCGA-55-7728	TCGA-55-7728-01A	TCGA-55-7728-01A-11R-2187-07	LUAD	female	a43e0f24-382c-431f-9bdb-94b3fa5c52a1	597af330-73d5-4905-803e-56d744ab723d.rna_seq.augmented_star_gene_counts.tsv	4252227	f098a29f5ad3a6da88dd05b9f1425632	NO_NFE2L2
	TCGA-55-7815	TCGA-55-7815-01A	TCGA-55-7815-01A-11R-2170-07	LUAD	male	5ecf82a3-8658-4a64-a14c-fc5d1d6f56f8	2172f060-6402-44dc-a918-2f9c15c21fa4.rna_seq.augmented_star_gene_counts.tsv	4207394	3fbe3820ba2a58b94cabf84d7191aaeb	KEAP1
	TCGA-55-7816	TCGA-55-7816-01A	TCGA-55-7816-01A-11R-2170-07	LUAD	female	215f38d1-a17c-4189-97f6-ae20361b0f3f	fdd9f9f1-8b02-4b83-a8f6-f28f968bdf54.rna_seq.augmented_star_gene_counts.tsv	4248206	84f21fd3f40729b3bd1f00daca2e8074	NO_NFE2L2
	TCGA-55-7903	TCGA-55-7903-01A	TCGA-55-7903-01A-11R-2170-07	LUAD	male	ae037177-0902-4c94-8e3c-632e240d3945	b71b334c-768e-46f6-bc7e-c95a11f44f03.rna_seq.augmented_star_gene_counts.tsv	4240764	4d981ef035274014c4677af0dac9d911	NO_NFE2L2
	TCGA-55-7907	TCGA-55-7907-01A	TCGA-55-7907-01A-11R-2170-07	LUAD	male	94d8b11e-0198-4f40-987a-44691b3b03fa	1efac920-fb46-4ac8-b8b1-d1f2743edefe.rna_seq.augmented_star_gene_counts.tsv	4224605	86cf9c580afa5f8a0e0898c02b70e087	NO_NFE2L2
	TCGA-55-7910	TCGA-55-7910-01A	TCGA-55-7910-01A-11R-2170-07	LUAD	female	b5b3c685-304f-4279-904a-c86c18f61576	f8a3b631-5140-45d0-8732-cb556d5f83b2.rna_seq.augmented_star_gene_counts.tsv	4221925	3a64a19aa379e81bd5c3bc4e64693b9b	NO_NFE2L2
	TCGA-55-7911	TCGA-55-7911-01A	TCGA-55-7911-01A-11R-2170-07	LUAD	female	eeacf4ac-09cf-41a8-8066-c38a173e61b4	73d96384-ebea-4467-8663-ada78336233c.rna_seq.augmented_star_gene_counts.tsv	4239848	2cc78fd591338744298101f62ddefcb9	NO_NFE2L2
	TCGA-55-7913	TCGA-55-7913-01B	TCGA-55-7913-01B-11R-2241-07	LUAD	female	a0fce6cc-a525-4970-82b7-8512bb0708b3	7d9c7c34-76e0-4622-b5f7-60e12f6d4e07.rna_seq.augmented_star_gene_counts.tsv	4252453	15cec03c65ac24e7da940cd4b9f99219	NO_NFE2L2
	TCGA-55-7914	TCGA-55-7914-01A	TCGA-55-7914-01A-11R-2170-07	LUAD	female	2e5071ce-d8cf-46e5-9cc0-91353f0d643c	22002e84-1d7a-4f93-9934-9d74f45195c0.rna_seq.augmented_star_gene_counts.tsv	4236416	c99f1da70059109c99a915d088f2db92	NO_NFE2L2
	TCGA-55-7994	TCGA-55-7994-01A	TCGA-55-7994-01A-11R-2187-07	LUAD	male	69a379e5-c8ba-43ed-b267-bad111c851fb	929a50ee-02a9-44f5-8078-e4020a89263f.rna_seq.augmented_star_gene_counts.tsv	4249251	4d87adab0256e62652f56526c1741c66	NO_NFE2L2
	TCGA-55-7995	TCGA-55-7995-01A	TCGA-55-7995-01A-11R-2187-07	LUAD	female	754343b4-f9f5-478a-a076-2791b8857c3e	8a6d64cc-3f03-4a5d-b6ce-83fa9c7f7d07.rna_seq.augmented_star_gene_counts.tsv	4258956	5af2aac801e2a7259b41ef4caca8fdac	KEAP1
	TCGA-55-8085	TCGA-55-8085-01A	TCGA-55-8085-01A-11R-2241-07	LUAD	male	74b6cce1-6a5b-4f86-8f41-d842106bfe8f	e48cabb8-73cd-4d42-81b0-f9ab7bebecc1.rna_seq.augmented_star_gene_counts.tsv	4250320	10a399584f292e29af3b0fce35b88872	CUL3_KEAP1
	TCGA-55-8087	TCGA-55-8087-01A	TCGA-55-8087-01A-11R-2241-07	LUAD	female	a4c14abb-5b10-41df-9da5-39f1ee194b7c	404aadcc-cb30-4dba-b2b3-efd573cd9ffe.rna_seq.augmented_star_gene_counts.tsv	4261315	e9c7ce2f753e3178ca6b9eb11071d82c	NO_NFE2L2
	TCGA-55-8089	TCGA-55-8089-01A	TCGA-55-8089-01A-11R-2241-07	LUAD	male	8af996d7-2c5e-4d17-b1a5-8751f4784eba	14aca23b-01ce-4532-8f2f-3b22b05a4757.rna_seq.augmented_star_gene_counts.tsv	4252855	7166bdae4df12eeb3a95dacf75e4ad73	NO_NFE2L2
	TCGA-55-8090	TCGA-55-8090-01A	TCGA-55-8090-01A-11R-2241-07	LUAD	male	2f6e63bb-17bd-4b53-8666-45c7159aa1f4	25212f64-8017-4b93-b171-10a830558566.rna_seq.augmented_star_gene_counts.tsv	4254049	3021a5584b5e58dd72257014c2898f85	NO_NFE2L2
	TCGA-55-8091	TCGA-55-8091-01A	TCGA-55-8091-01A-11R-2241-07	LUAD	male	3e752bb7-c91d-46f8-ba39-a40e26357b4d	32dd8db9-1e43-497e-a35a-664d7d15ed60.rna_seq.augmented_star_gene_counts.tsv	4248639	ea16407248bc5498807d4a096f857771	NO_NFE2L2
	TCGA-55-8092	TCGA-55-8092-01A	TCGA-55-8092-01A-11R-2241-07	LUAD	male	133bfadb-ed2e-4b10-a5bf-46d31ade6dd4	d6662ab3-af1a-4e7e-a907-111e4241713b.rna_seq.augmented_star_gene_counts.tsv	4256573	4658c9ac1bc63d30ce4b7e5a7921f3c7	NO_NFE2L2
	TCGA-55-8094	TCGA-55-8094-01A	TCGA-55-8094-01A-11R-2241-07	LUAD	male	51ec5a15-11e8-435a-a3e0-2a99690309b9	7276835e-ce0e-4fc6-a329-27d936c136ba.rna_seq.augmented_star_gene_counts.tsv	4230705	8b759407788b4ee751e262bda55b4ef3	KEAP1
	TCGA-55-8096	TCGA-55-8096-01A	TCGA-55-8096-01A-11R-2241-07	LUAD	female	18be89fe-3383-45a2-9c0e-b1246e88c82d	77ca7978-5bc4-4264-8ca3-db132049c8a8.rna_seq.augmented_star_gene_counts.tsv	4264852	d70ff86e73201884a3de84fa2adfbdda	NO_NFE2L2
	TCGA-55-8097	TCGA-55-8097-01A	TCGA-55-8097-01A-11R-2241-07	LUAD	female	87b1a89f-591c-4d6b-929d-2eae2951740e	42ecec5f-f097-4d86-a9d9-cf0507b08c42.rna_seq.augmented_star_gene_counts.tsv	4262465	a6f75c1ad6217d7659b7b651205a9261	NO_NFE2L2
	TCGA-55-8203	TCGA-55-8203-01A	TCGA-55-8203-01A-11R-2241-07	LUAD	female	c96036a1-2f21-47fc-a5ea-54389bf26502	f07f72e3-8bd8-4a16-91b4-e4444c2745d9.rna_seq.augmented_star_gene_counts.tsv	4257258	7d821dc1a06dac4e96a7273f1036dc2d	NO_NFE2L2
	TCGA-55-8204	TCGA-55-8204-01A	TCGA-55-8204-01A-11R-2241-07	LUAD	female	76ac1fee-bf40-463f-a4d8-cb9affe0e7c5	7086e8ce-d1e5-4901-ac33-31c299f46356.rna_seq.augmented_star_gene_counts.tsv	4247335	e02c45cf2ed173e2a353fd83b6cea964	NO_NFE2L2
	TCGA-55-8205	TCGA-55-8205-01A	TCGA-55-8205-01A-11R-2241-07	LUAD	female	c79162f6-be6e-46b1-aca7-438423fed6c3	98f9eaa2-866f-4223-ad25-f93020214b4e.rna_seq.augmented_star_gene_counts.tsv	4250133	b9122a3fac42973365eb6bef6b19a98f	NO_NFE2L2
	TCGA-55-8206	TCGA-55-8206-01A	TCGA-55-8206-01A-11R-2241-07	LUAD	male	901c6ff1-19bf-48d8-894d-766f1995a916	aec36454-d9a1-4d51-90c6-561f219b6aee.rna_seq.augmented_star_gene_counts.tsv	4258240	cb207a8f7a526f6199dd3eb7218bcacd	NO_NFE2L2
	TCGA-55-8207	TCGA-55-8207-01A	TCGA-55-8207-01A-11R-2241-07	LUAD	male	7c802f6c-03bd-4612-835f-c82f6b8f2137	9f938aa7-9fc1-4893-aee4-15ab668b9260.rna_seq.augmented_star_gene_counts.tsv	4250317	14aaa84fb2138c7d738d057b693f80a9	NO_NFE2L2
	TCGA-55-8208	TCGA-55-8208-01A	TCGA-55-8208-01A-11R-2241-07	LUAD	female	87b32d0a-6e9c-466d-a563-688142d3df95	c45c7b03-a317-4dac-ba0f-19989348cae3.rna_seq.augmented_star_gene_counts.tsv	4250270	fff2a6655b234dfc7eee7fb4c1e625d3	NO_NFE2L2
	TCGA-55-8299	TCGA-55-8299-01A	TCGA-55-8299-01A-11R-2287-07	LUAD	female	2a7831f2-aa57-4e6f-92b3-0a7a727d5637	cbdf1edd-a8c9-4fc8-88ee-928f01abae34.rna_seq.augmented_star_gene_counts.tsv	4242648	023d4ff2fef18979b47a6b5585f3dfa5	NO_NFE2L2
	TCGA-55-8301	TCGA-55-8301-01A	TCGA-55-8301-01A-11R-2287-07	LUAD	male	5fa5664e-daf5-4082-8d39-703a5d650e43	a6caa89b-29fc-46cf-8d6b-a6c0241be6d7.rna_seq.augmented_star_gene_counts.tsv	4241712	1b8d306c7b79f00655a7ebd2517ef9a5	NO_NFE2L2
	TCGA-55-8302	TCGA-55-8302-01A	TCGA-55-8302-01A-11R-2326-07	LUAD	male	b5df8e57-5822-4192-a4a4-398d11e9d968	6b48d62b-0932-48df-9448-ae6dcb8853b2.rna_seq.augmented_star_gene_counts.tsv	4232279	3d1b590b2250f34bf59793fc302e218f	KEAP1
	TCGA-55-8505	TCGA-55-8505-01A	TCGA-55-8505-01A-11R-2403-07	LUAD	male	f8d97584-0c4f-4bb1-b4a7-77d87aabc852	268f14f5-e6f7-413a-90a6-20a205012246.rna_seq.augmented_star_gene_counts.tsv	4232803	5b34f264b48b5b934be5a50e1520121c	KEAP1
	TCGA-55-8506	TCGA-55-8506-01A	TCGA-55-8506-01A-11R-2403-07	LUAD	female	f51ce896-53bf-4f3b-ac5f-a499b84a7add	23aeef43-0657-45f1-835e-52a829f0bea2.rna_seq.augmented_star_gene_counts.tsv	4227595	ae9ee229e726c01cdef1606a0e956f1e	KEAP1
	TCGA-55-8507	TCGA-55-8507-01A	TCGA-55-8507-01A-11R-2403-07	LUAD	male	3976128b-36ba-4bf0-8121-867e89aba2c9	fec7a02d-1d67-412d-9d69-df7124864e7a.rna_seq.augmented_star_gene_counts.tsv	4237015	9fd77741af4d59ab2697eb01c9cf90d9	NO_NFE2L2
	TCGA-55-8508	TCGA-55-8508-01A	TCGA-55-8508-01A-11R-2403-07	LUAD	female	9f1c581d-42a9-4067-8b91-5d309457b5e8	aac03db2-1e90-4c0e-9094-4df06abeb84d.rna_seq.augmented_star_gene_counts.tsv	4219664	afec85b38f09563a0aca66cd9d133375	NO_NFE2L2
	TCGA-55-8510	TCGA-55-8510-01A	TCGA-55-8510-01A-11R-2403-07	LUAD	female	da428df4-37ee-43d6-9090-7b94d67968e9	56d2e7e0-7686-417f-a698-393a1385d87e.rna_seq.augmented_star_gene_counts.tsv	4232938	68c40a06e83169f9661b8bc73d607490	KEAP1
	TCGA-55-8511	TCGA-55-8511-01A	TCGA-55-8511-01A-11R-2403-07	LUAD	female	4b2e6f07-59e6-47c0-85ea-1e73f3354a01	27e24fc6-af40-4152-8424-a9d365c717d9.rna_seq.augmented_star_gene_counts.tsv	4231730	c0062d3812c06633f6f9b9372e354ce8	NO_NFE2L2
	TCGA-55-8512	TCGA-55-8512-01A	TCGA-55-8512-01A-11R-2403-07	LUAD	male	c7ee3fa6-4a2f-4824-a098-91ce6c1223c3	a4f3f3fa-b161-402b-bc1a-1dddd6be8097.rna_seq.augmented_star_gene_counts.tsv	4243160	a77292fecf469bc39181451fc11841d8	NO_NFE2L2
	TCGA-55-8513	TCGA-55-8513-01A	TCGA-55-8513-01A-11R-2403-07	LUAD	female	593e91b8-cbcd-4dbf-95ed-9dce881a430b	8d438e20-04cb-4b39-b3a9-96a3a35de104.rna_seq.augmented_star_gene_counts.tsv	4231720	9f8c230a15bf3b782827f7c355f3eff4	NO_NFE2L2
	TCGA-55-8514	TCGA-55-8514-01A	TCGA-55-8514-01A-11R-2403-07	LUAD	female	44964e02-9283-4a48-a9e4-006a75d4120e	b0747254-d7fd-4ec9-96b1-d132540c4b46.rna_seq.augmented_star_gene_counts.tsv	4226821	0eead65bb92ab1e66f317179542270a8	NO_NFE2L2
	TCGA-55-8614	TCGA-55-8614-01A	TCGA-55-8614-01A-11R-2403-07	LUAD	male	d2436cea-20c9-4c32-98d3-61eb445865be	56ba7921-5bee-4a1e-9fba-a78a034547a6.rna_seq.augmented_star_gene_counts.tsv	4233839	62d0d93247cfba62970644403835bb37	NO_NFE2L2
	TCGA-55-8615	TCGA-55-8615-01A	TCGA-55-8615-01A-11R-2403-07	LUAD	male	4c2a4d47-67dd-4c12-8f3b-1c55eb6fd00e	c6bf25d8-abea-411f-bb80-6e6fefb82757.rna_seq.augmented_star_gene_counts.tsv	4233205	f895fefd4930b04b87c8e4ea8b1c598a	NO_NFE2L2
	TCGA-55-8616	TCGA-55-8616-01A	TCGA-55-8616-01A-11R-2403-07	LUAD	female	927beddd-e0e7-4695-b744-79f27519389e	044b4834-bb51-40c8-8027-e5d752fa8787.rna_seq.augmented_star_gene_counts.tsv	4234478	1fe66fdefd31ec9515e8bd37a6087e25	NO_NFE2L2
	TCGA-55-8619	TCGA-55-8619-01A	TCGA-55-8619-01A-11R-2403-07	LUAD	female	b5c6258a-8591-4f96-81d5-8ecc931b57a8	e5ff9d44-3193-4baa-bf04-c86563d3c9a9.rna_seq.augmented_star_gene_counts.tsv	4234192	81c9992f5c63a9f8ce3fd3143e3c6939	NO_NFE2L2
	TCGA-55-8620	TCGA-55-8620-01A	TCGA-55-8620-01A-11R-2403-07	LUAD	male	0c212a58-9a27-4850-bb22-540502e893dc	57d89d75-a9bb-4bd3-af76-d29def9a9625.rna_seq.augmented_star_gene_counts.tsv	4237046	87a42acee64207ba01415d1af99e9b4b	KEAP1
	TCGA-55-8621	TCGA-55-8621-01A	TCGA-55-8621-01A-11R-2403-07	LUAD	female	8b26e78c-f162-48fc-8c1b-9628baa3ca62	b603c2a6-4366-415a-871e-5949a2a8a4b6.rna_seq.augmented_star_gene_counts.tsv	4241775	506c16c3914540043a5a84458df4cd36	NO_NFE2L2
	TCGA-55-A48X	TCGA-55-A48X-01A	TCGA-55-A48X-01A-11R-A24H-07	LUAD	female	b06a3383-3a16-4f91-91c4-71cad60dae4b	897e33bc-3862-47bc-8277-a9b1b5371802.rna_seq.augmented_star_gene_counts.tsv	4245425	0ca130d5ecf485bfd517f70aa3326719	NO_NFE2L2
	TCGA-55-A48Y	TCGA-55-A48Y-01A	TCGA-55-A48Y-01A-11R-A24H-07	LUAD	male	8d308359-6f2a-4c2a-a2e7-b1a3b8d79de9	4772e349-a753-4c41-9c48-ae3af0f58520.rna_seq.augmented_star_gene_counts.tsv	4227978	09a0040484a54a2677585e08ab623437	NFE2L2
	TCGA-55-A48Z	TCGA-55-A48Z-01A	TCGA-55-A48Z-01A-12R-A24X-07	LUAD	female	bae11f13-84a4-4fe3-b9e4-9d48b74896af	da046621-2982-42dc-b54d-6c875ecb5368.rna_seq.augmented_star_gene_counts.tsv	4244861	88a3c28c7d2701a31a9ae9f802e569d0	NO_NFE2L2
	TCGA-55-A490	TCGA-55-A490-01A	TCGA-55-A490-01A-11R-A466-07	LUAD	male	864c2830-c699-433c-bcba-20f0c692854a	aa764c7d-2e26-4e8c-94d3-870772bad93f.rna_seq.augmented_star_gene_counts.tsv	4229001	d1914be91865ed6be3de00fba503c10e	NO_NFE2L2
	TCGA-55-A491	TCGA-55-A491-01A	TCGA-55-A491-01A-11R-A24H-07	LUAD	female	987832ae-aab4-430f-abc1-8783736fbe69	ed0926c8-6642-4741-9de6-e04014ba0364.rna_seq.augmented_star_gene_counts.tsv	4234546	9256869621404e0b417a632ed53adbf2	NO_NFE2L2
	TCGA-55-A492	TCGA-55-A492-01A	TCGA-55-A492-01A-11R-A24H-07	LUAD	female	0ece8b9b-d1c3-4f03-b70d-6bc06c6f52ce	a585711d-48a4-45bd-bb45-f9d2a7717af0.rna_seq.augmented_star_gene_counts.tsv	4229724	25207b9becd97f541d1aff7d828905e3	KEAP1
	TCGA-55-A493	TCGA-55-A493-01A	TCGA-55-A493-01A-11R-A24H-07	LUAD	female	af2c7fc6-003d-4c41-bba5-95a005699a57	f74d61fe-042f-4cfc-a32b-380389629951.rna_seq.augmented_star_gene_counts.tsv	4240829	e41a5b485cbcff3bfed013b31c63a340	NO_NFE2L2
	TCGA-55-A494	TCGA-55-A494-01A	TCGA-55-A494-01A-11R-A24X-07	LUAD	female	4c37a5fe-812f-42ac-aa56-259b31df6894	482e60ad-222e-4ead-8a3c-a3b44e54aa5e.rna_seq.augmented_star_gene_counts.tsv	4242709	3cd3cfb8e558b5e2603b79c6f2b79bd1	NO_NFE2L2
	TCGA-55-A4DF	TCGA-55-A4DF-01A	TCGA-55-A4DF-01A-11R-A24H-07	LUAD	male	023a34d9-c000-4053-b695-5b984b4a6fc1	06770623-6a10-4874-9eea-1497077f18ac.rna_seq.augmented_star_gene_counts.tsv	4248724	784ae5f0b02aa4f9f0abb26097e161d5	KEAP1
	TCGA-55-A4DG	TCGA-55-A4DG-01A	TCGA-55-A4DG-01A-11R-A24H-07	LUAD	male	3baa9c28-dfb3-4ec3-9e3c-1d2f1421b00f	1a0143ed-cd70-498f-b094-bc71b6921fb3.rna_seq.augmented_star_gene_counts.tsv	4242824	1e1576c258b94934785329e302ce6a21	NO_NFE2L2
	TCGA-55-A57B	TCGA-55-A57B-01A	TCGA-55-A57B-01A-12R-A39D-07	LUAD	female	aca8bace-37c5-4ec0-958c-13907ae97d1f	48fdafbf-3f8b-46ba-8aa9-f081f0b54739.rna_seq.augmented_star_gene_counts.tsv	4255640	a67d594583737083eb37c6b466257c7a	NO_NFE2L2
	TCGA-62-8394	TCGA-62-8394-01A	TCGA-62-8394-01A-11R-2326-07	LUAD	female	7f827e47-e374-4c0e-8fec-b53018bfad03	f01d4b93-8aeb-4b87-a063-59d7b6057fba.rna_seq.augmented_star_gene_counts.tsv	4243758	a23de752384e55c3561f88e8ca95c827	NO_NFE2L2
	TCGA-62-8395	TCGA-62-8395-01A	TCGA-62-8395-01A-11R-2326-07	LUAD	female	37fe51a0-c056-492e-b0c5-eb0502d73416	fec056a5-e860-4b68-8fa0-39cb7ad78a62.rna_seq.augmented_star_gene_counts.tsv	4241793	8cd4f7b0a914f01a83e8a685b9000b42	NFE2L2
	TCGA-62-8397	TCGA-62-8397-01A	TCGA-62-8397-01A-11R-2326-07	LUAD	female	bca264e4-3883-409f-ad4e-f56f81c7c93e	21a80f43-21be-4549-901b-c99083021c30.rna_seq.augmented_star_gene_counts.tsv	4197791	2d8946bcff7aaeab71b0b637cd33f18c	NO_NFE2L2
	TCGA-62-8398	TCGA-62-8398-01A	TCGA-62-8398-01A-11R-2326-07	LUAD	male	76cc364e-8214-4a17-8083-9ea80e74c400	918be5f7-a963-406f-8ce4-0a3e528998e5.rna_seq.augmented_star_gene_counts.tsv	4243235	532a71a067f0e4104b824a67c52d0839	KEAP1
	TCGA-62-8399	TCGA-62-8399-01A	TCGA-62-8399-01A-21R-2326-07	LUAD	male	cc481383-4ebf-410c-8dd7-ef0b117bd035	c2c5b3f8-abe2-4112-9ddd-70056f268137.rna_seq.augmented_star_gene_counts.tsv	4245451	97dccb66156f524188e123e11e212ea0	NO_NFE2L2
	TCGA-62-8402	TCGA-62-8402-01A	TCGA-62-8402-01A-11R-2326-07	LUAD	female	ab24be1b-969c-48f2-bc98-8b89bc719b4c	2a48ffd2-9212-48f4-a836-7572eb2feffe.rna_seq.augmented_star_gene_counts.tsv	4236126	e3867dbc0c259e4a45e585822b6ee6ba	NO_NFE2L2
	TCGA-62-A46O	TCGA-62-A46O-01A	TCGA-62-A46O-01A-11R-A24H-07	LUAD	female	63a884f4-0d20-4cb5-b485-72e066b6490f	d3ebb2ea-10db-4c29-8e7c-7c13b23b5b15.rna_seq.augmented_star_gene_counts.tsv	4231541	ed0423f0517fabc14c44cdcd125c1956	KEAP1
	TCGA-62-A46P	TCGA-62-A46P-01A	TCGA-62-A46P-01A-11R-A24H-07	LUAD	male	0869efb9-b167-45af-8b2c-67433e39baad	ef19e097-8ae9-4362-b77a-76d8f5399760.rna_seq.augmented_star_gene_counts.tsv	4219837	1362b5ced69dd2236a7d183880851851	NO_NFE2L2
	TCGA-62-A46R	TCGA-62-A46R-01A	TCGA-62-A46R-01A-11R-A24H-07	LUAD	female	12272d02-341e-43a2-aa23-7232a8dde730	d4db8bd3-6f2f-4c34-a4a7-1e23342e62b5.rna_seq.augmented_star_gene_counts.tsv	4235952	295046bc13ef8d662a8ff4de95d891a4	NO_NFE2L2
	TCGA-62-A46S	TCGA-62-A46S-01A	TCGA-62-A46S-01A-11R-A24H-07	LUAD	male	85feefbe-6aad-430b-a882-c71e4a5d1e07	160dd8d4-3262-4789-bd92-d5470bc7d41b.rna_seq.augmented_star_gene_counts.tsv	4240771	46f6d40d38e0220b88ece7a6a1769424	NO_NFE2L2
	TCGA-62-A46U	TCGA-62-A46U-01A	TCGA-62-A46U-01A-11R-A24H-07	LUAD	female	fb60fc57-836c-42e1-bc96-042b82d1a878	21eea21d-7db3-4f85-a9e4-72cbb562b5ed.rna_seq.augmented_star_gene_counts.tsv	4244228	39731a67ca0d8a74c19679a2772f008d	NO_NFE2L2
	TCGA-62-A46V	TCGA-62-A46V-01A	TCGA-62-A46V-01A-11R-A24H-07	LUAD	female	fd52d8a9-e044-4f17-861a-9780752b20ee	1084d48c-88e8-4d67-9049-d0e4cd7f9535.rna_seq.augmented_star_gene_counts.tsv	4240394	be9025f55d1bd23e3ac1aa39b5066e11	CUL3
	TCGA-62-A46Y	TCGA-62-A46Y-01A	TCGA-62-A46Y-01A-11R-A24H-07	LUAD	female	b45e937f-da60-4259-8fa2-e64ee4fdbe95	534541e5-89a2-46bc-98d3-1fed57d6e4c1.rna_seq.augmented_star_gene_counts.tsv	4242321	96572e6dc92f8c130db10e361a8012b0	NO_NFE2L2
	TCGA-62-A470	TCGA-62-A470-01A	TCGA-62-A470-01A-11R-A24H-07	LUAD	male	51f545d2-3da2-46c1-9ed4-204133701dad	ebc79b86-12cb-4a5b-b0e4-4d1017ef22f4.rna_seq.augmented_star_gene_counts.tsv	4210246	4ec5b81c26d790a1025a3e2de08d3327	KEAP1
	TCGA-62-A471	TCGA-62-A471-01A	TCGA-62-A471-01A-12R-A24H-07	LUAD	male	03680aea-84a2-4775-bb9c-24f8c5907247	0a4e0b83-7afa-475b-8586-e9e79e31d6d2.rna_seq.augmented_star_gene_counts.tsv	4234605	06d101f59bf8eae8dd11581cea5894b9	NO_NFE2L2
	TCGA-62-A472	TCGA-62-A472-01A	TCGA-62-A472-01A-11R-A24H-07	LUAD	male	7666bfbe-6803-4b5d-b3b4-e9069fc4bea5	c18d9cb5-17ca-4c49-bd72-4b4c6184fba3.rna_seq.augmented_star_gene_counts.tsv	4220158	599701dbdeae7d240828cacbe37318a4	NO_NFE2L2
	TCGA-64-1676	TCGA-64-1676-01A	TCGA-64-1676-01A-01R-0946-07	LUAD	male	a62db40f-4e4f-496c-84ed-ab9500b89757	cd271741-c470-4f57-9873-635fef14f902.rna_seq.augmented_star_gene_counts.tsv	4218941	0181ebe0b8f91a84d55e9fdcc8a2448b	NO_NFE2L2
	TCGA-64-1677	TCGA-64-1677-01A	TCGA-64-1677-01A-01R-0946-07	LUAD	female	49453e81-56b8-43b7-b56f-6195038a1142	ed30ab10-5d65-4aeb-ba72-ec3e9b768cd3.rna_seq.augmented_star_gene_counts.tsv	4212895	48a773f9dc82c8e4558bd66038da6bea	NO_NFE2L2
	TCGA-64-1678	TCGA-64-1678-01A	TCGA-64-1678-01A-01R-0946-07	LUAD	female	82e982fc-138a-48f8-8127-fb20caa019a2	b1d9364c-d703-4884-b96d-20d8084040a8.rna_seq.augmented_star_gene_counts.tsv	4215198	54f1b9cb73ec7405a3d531defbada6b5	NO_NFE2L2
	TCGA-64-1679	TCGA-64-1679-01A	TCGA-64-1679-01A-21R-2066-07	LUAD	female	503df94c-0048-4f7b-b957-3f8304be73f0	7d46888b-282b-4f43-a09a-ff44bd1af110.rna_seq.augmented_star_gene_counts.tsv	4252024	ad0274a89cab084d126ea5c05a86f59c	CUL3
	TCGA-64-1680	TCGA-64-1680-01A	TCGA-64-1680-01A-02R-0946-07	LUAD	male	505bfb1f-dc96-4f7e-ba2c-8e20eb0e1f6c	8b3aec43-4c75-4598-bf0a-168f7ffb9f3b.rna_seq.augmented_star_gene_counts.tsv	4220006	b2f63e2077860a37964300344dd3d23c	NO_NFE2L2
	TCGA-64-1681	TCGA-64-1681-01A	TCGA-64-1681-01A-11R-2066-07	LUAD	female	306febc7-f9b2-493a-9520-b9700d0f3e47	04c4affd-ca5d-4ea4-95d1-a6502e80d1af.rna_seq.augmented_star_gene_counts.tsv	4247685	2f1039985e94678936c051c4119da1cd	NO_NFE2L2
	TCGA-64-5774	TCGA-64-5774-01A	TCGA-64-5774-01A-01R-1628-07	LUAD	male	db9bab18-a465-445f-a4fd-dc90faa1da6d	5a335f07-9b07-46cf-8902-503b24f89bfa.rna_seq.augmented_star_gene_counts.tsv	4236644	0687e96c67caf44632fd921fad9f91a3	NO_NFE2L2
	TCGA-64-5775	TCGA-64-5775-01A	TCGA-64-5775-01A-01R-1628-07	LUAD	male	c140ee8e-c45f-47fb-b214-c3c8cdde972e	b5909b96-7ef6-497a-802e-11805dc7ded7.rna_seq.augmented_star_gene_counts.tsv	4225356	c8a1f9e2ec7fa72254b4a3d602c5e39f	NO_NFE2L2
	TCGA-64-5778	TCGA-64-5778-01A	TCGA-64-5778-01A-01R-1628-07	LUAD	male	cb061496-b611-48bb-9484-c6ca07f9951e	4b6faa2b-5b8d-4ee5-ac5d-aafa6d95327f.rna_seq.augmented_star_gene_counts.tsv	4234595	7a1e7f013be2ee8a3b3499df31923bd2	NO_NFE2L2
	TCGA-64-5779	TCGA-64-5779-01A	TCGA-64-5779-01A-01R-1628-07	LUAD	male	b817c1a8-7e62-423e-b7e0-eb9136fe0455	73559b1e-ad93-432f-a7bb-c3946d4120d4.rna_seq.augmented_star_gene_counts.tsv	4230562	d165dd36e556a7fcfb1c7748ca6e63de	NO_NFE2L2
	TCGA-64-5781	TCGA-64-5781-01A	TCGA-64-5781-01A-01R-1628-07	LUAD	female	dfc3bc40-b667-4f75-a932-4074c0b0c408	484f0a13-a636-484b-9880-5066955dee6e.rna_seq.augmented_star_gene_counts.tsv	4221024	e493bfaf02ca6ab9c2322feb873d9156	KEAP1
	TCGA-64-5815	TCGA-64-5815-01A	TCGA-64-5815-01A-01R-1628-07	LUAD	male	21285d92-3596-4a82-91ae-a99e22479a3c	4f721842-9460-4376-b577-59c3731f34a6.rna_seq.augmented_star_gene_counts.tsv	4217677	d8b5726161df406be7d7bce03f7051ff	NO_NFE2L2
	TCGA-67-3770	TCGA-67-3770-01A	TCGA-67-3770-01A-01R-0946-07	LUAD	female	67543f50-3821-4723-842d-3924b9a32142	1da64d9f-f5dd-4017-bf82-d1a61512b56b.rna_seq.augmented_star_gene_counts.tsv	4217045	0a7a8cd5f1ff8bb03146c36f27b55c39	NO_NFE2L2
	TCGA-67-3771	TCGA-67-3771-01A	TCGA-67-3771-01A-01R-0946-07	LUAD	female	29bb005f-53d0-44e6-8626-d6bbe0dba8be	d53203c7-5070-455b-aec3-ce01f32186de.rna_seq.augmented_star_gene_counts.tsv	4235128	6fb070522dad7bdec32689d09a192b0d	KEAP1
	TCGA-67-3772	TCGA-67-3772-01A	TCGA-67-3772-01A-01R-0946-07	LUAD	female	58b3d72d-6cff-4c5c-9317-13d88cd17b79	49ab8f1a-6252-47b0-9f16-63e065f33efd.rna_seq.augmented_star_gene_counts.tsv	4236793	d577430cc1b82504a921cbd36a0baa39	NO_NFE2L2
	TCGA-67-3773	TCGA-67-3773-01A	TCGA-67-3773-01A-01R-0946-07	LUAD	female	269a7c8d-f4d6-4f1a-a85b-874934f214b9	75eaaf2c-7cd9-416d-88c0-7c5502db9ab5.rna_seq.augmented_star_gene_counts.tsv	4216676	2fd721554185bc4cff98277c0b4138a5	NO_NFE2L2
	TCGA-67-3774	TCGA-67-3774-01A	TCGA-67-3774-01A-01R-0946-07	LUAD	female	d00354a6-0cdd-42c0-8d0c-1f87f4fdc843	ca927d21-e459-469e-9655-c214b34447f7.rna_seq.augmented_star_gene_counts.tsv	4232331	887b5dd39ebee8808caad2ea192d3516	NO_NFE2L2
	TCGA-67-4679	TCGA-67-4679-01B	TCGA-67-4679-01B-01R-1755-07	LUAD	male	77b2c8e8-d630-4b66-be6e-db594df4e0ec	fc4f0b8e-ced1-4543-a21d-3cbb2d269eb0.rna_seq.augmented_star_gene_counts.tsv	4233531	68a918ea345dbed817a274accc49bf8c	NO_NFE2L2
	TCGA-67-6215	TCGA-67-6215-01A	TCGA-67-6215-01A-11R-1755-07	LUAD	female	edfdd711-4764-43a7-9948-4320dc17b2b1	7a7440bf-1ca1-4c6b-80f8-7151a38e5d18.rna_seq.augmented_star_gene_counts.tsv	4249016	f162e413b4faf2d30348c355707d16e0	NO_NFE2L2
	TCGA-67-6216	TCGA-67-6216-01A	TCGA-67-6216-01A-11R-1755-07	LUAD	female	a5407526-9c45-427b-abcc-65d6e1f87158	c208cf0f-3922-4159-a7dd-76dccf9ff396.rna_seq.augmented_star_gene_counts.tsv	4229240	977894d85184f34de20c1e64f29b22d1	NO_NFE2L2
	TCGA-67-6217	TCGA-67-6217-01A	TCGA-67-6217-01A-11R-1755-07	LUAD	female	7a26df49-5d12-4dc2-b686-07e015a415b0	1e3d606d-e374-460c-a046-b6c98aa8256b.rna_seq.augmented_star_gene_counts.tsv	4235093	4227d00c4ec12db70520d68161741ce9	NO_NFE2L2
	TCGA-69-7760	TCGA-69-7760-01A	TCGA-69-7760-01A-11R-2170-07	LUAD	male	d21e7461-c76d-4ae7-be02-313c3c34118d	72fe0e80-b3e6-4249-8345-fb9ff8d2ca9b.rna_seq.augmented_star_gene_counts.tsv	4227754	69cae17d13ab5d42ff7c3c9c4e7383ac	NO_NFE2L2
	TCGA-69-7761	TCGA-69-7761-01A	TCGA-69-7761-01A-11R-2170-07	LUAD	male	36101746-9c10-478e-96fb-8b47d057a6d4	eaaacefc-a798-4b6e-8471-0fde96a80bb9.rna_seq.augmented_star_gene_counts.tsv	4236063	e442bf31d98890c4736b2d726f83931d	NO_NFE2L2
	TCGA-69-7763	TCGA-69-7763-01A	TCGA-69-7763-01A-11R-2170-07	LUAD	male	8a884668-03c2-44bb-8ea0-5b0d0bc68aa4	c8e5ea6c-c6b1-4807-8d9f-b2e96154a1eb.rna_seq.augmented_star_gene_counts.tsv	4230058	041a0de4e94a309df0391132ec129e3c	NO_NFE2L2
	TCGA-69-7764	TCGA-69-7764-01A	TCGA-69-7764-01A-11R-2170-07	LUAD	male	09f9f414-db5b-4b54-9e8e-234bf9d7c678	81a33f6c-0195-45c5-87e7-7748838d0a4e.rna_seq.augmented_star_gene_counts.tsv	4229060	fd359929e01900197b0e1d69a3a8e4ee	NO_NFE2L2
	TCGA-69-7765	TCGA-69-7765-01A	TCGA-69-7765-01A-11R-2170-07	LUAD	male	0905662e-ae14-4807-94ef-69db108fa2ee	e121b871-b177-47ef-a4f1-de73cb338519.rna_seq.augmented_star_gene_counts.tsv	4230748	4620c82ab3a9282afb23736a5cf2bedc	NO_NFE2L2
	TCGA-69-7973	TCGA-69-7973-01A	TCGA-69-7973-01A-11R-2187-07	LUAD	female	577f10d0-c9a2-47c3-aa2f-b1bd5bd86d90	3b21349a-ee41-45bf-87de-19b6cda494d5.rna_seq.augmented_star_gene_counts.tsv	4257885	0d57d3831709ab5d4813c95f6eaa641a	NO_NFE2L2
	TCGA-69-7974	TCGA-69-7974-01A	TCGA-69-7974-01A-11R-2187-07	LUAD	female	87d1edd3-df03-4046-a888-86baa85639b6	8ce815e6-3c63-4cbf-8480-4f07867f18da.rna_seq.augmented_star_gene_counts.tsv	4254085	872ff233eaee490ee0d78b06b3d83cb6	NO_NFE2L2
	TCGA-69-7978	TCGA-69-7978-01A	TCGA-69-7978-01A-11R-2187-07	LUAD	male	466db517-921b-47e8-b249-b4c9bd714bfd	28e5e6cc-60b0-4324-b05e-d05af474da90.rna_seq.augmented_star_gene_counts.tsv	4250649	d3b9fd17453841cff2554e66dc1a6776	NO_NFE2L2
	TCGA-69-7979	TCGA-69-7979-01A	TCGA-69-7979-01A-11R-2187-07	LUAD	female	668d7295-629a-496a-b525-b5b8157baf11	e25887be-64fe-4e7c-983b-4fbdec52c4b7.rna_seq.augmented_star_gene_counts.tsv	4251449	4d3665909fdb463d2fb915b38b7159fb	NO_NFE2L2
	TCGA-69-7980	TCGA-69-7980-01A	TCGA-69-7980-01A-11R-2187-07	LUAD	female	6feef177-114c-4285-b242-481fe0aea551	77322072-2a7f-49e6-a9d1-c521c25acd70.rna_seq.augmented_star_gene_counts.tsv	4257905	45b7be11c5973bc8825c17ba14a80053	NO_NFE2L2
	TCGA-69-8253	TCGA-69-8253-01A	TCGA-69-8253-01A-11R-2287-07	LUAD	female	15998b11-5041-4e2d-94d9-cf714c796c13	22d87348-bca7-4428-b8e2-2f161d77bcc5.rna_seq.augmented_star_gene_counts.tsv	4248837	3cdbc28b5bfcb065f57a3f4584ad6cec	KEAP1
	TCGA-69-8254	TCGA-69-8254-01A	TCGA-69-8254-01A-11R-2287-07	LUAD	male	e0ff7e04-078a-46a4-ac8c-8a287c1d608e	aa0b2722-97db-4b5a-9a56-213f63255097.rna_seq.augmented_star_gene_counts.tsv	4261203	a3021ebe129a6457c2e108905e0a5053	NO_NFE2L2
	TCGA-69-8255	TCGA-69-8255-01A	TCGA-69-8255-01A-11R-2287-07	LUAD	male	157223aa-aab5-4522-8ff2-8104ea3561d9	e40ae18a-9f57-4069-b99f-260c93b52e9f.rna_seq.augmented_star_gene_counts.tsv	4257201	11b684d65c727ce1b971cdf37acb6ad2	NO_NFE2L2
	TCGA-69-8453	TCGA-69-8453-01A	TCGA-69-8453-01A-12R-2326-07	LUAD	male	fe20855f-d3ce-4e02-b2dd-3df15eab44bf	564e41d6-f9a4-4a6b-bb97-f8e5423b84bd.rna_seq.augmented_star_gene_counts.tsv	4239776	aa92e0c44d12854b5d66c99265e33c77	NO_NFE2L2
	TCGA-69-A59K	TCGA-69-A59K-01A	TCGA-69-A59K-01A-11R-A262-07	LUAD	female	36432508-6673-489b-aefe-d172b83abac2	00fabec9-d311-4994-a7e5-eb91178d14f2.rna_seq.augmented_star_gene_counts.tsv	4250149	82f484e8d9f75930300dad5baa17f57a	NO_NFE2L2
	TCGA-71-6725	TCGA-71-6725-01A	TCGA-71-6725-01A-11R-1858-07	LUAD	female	1f911a28-0d7a-4f57-b358-cc6277b2008b	094bd5ef-b1ca-46c6-b717-2519e5a6151b.rna_seq.augmented_star_gene_counts.tsv	4243723	ea458a18f0a1b519d8c6919c5292db38	NO_NFE2L2
	TCGA-71-8520	TCGA-71-8520-01A	TCGA-71-8520-01A-11R-2403-07	LUAD	female	d23c89e5-b295-40b7-a5e8-ee1d4a584dd4	dd6e2735-7d83-4bc4-87b3-05a5d7f08caa.rna_seq.augmented_star_gene_counts.tsv	4231599	4650e418a722ce83238d5beaa9809944	NO_NFE2L2
	TCGA-73-4658	TCGA-73-4658-01A	TCGA-73-4658-01A-01R-1755-07	LUAD	female	c568fdc8-6942-44ff-a9d9-3f7a03fdc62a	367864dd-ccd2-473e-9661-6ff4342a4e64.rna_seq.augmented_star_gene_counts.tsv	4226419	a352405548831c550b90884f50402acc	NO_NFE2L2
	TCGA-73-4659	TCGA-73-4659-01A	TCGA-73-4659-01A-01R-1206-07	LUAD	male	6d0c282d-43d7-44fb-94e6-25771385e326	d4422306-b68c-4687-9131-02a60a2d4c42.rna_seq.augmented_star_gene_counts.tsv	4263467	552ee233c6cb65b341ebd50ae1236118	NO_NFE2L2
	TCGA-73-4662	TCGA-73-4662-01A	TCGA-73-4662-01A-01R-1206-07	LUAD	female	38bc7dc7-3a4f-4fd9-ad6d-306dc8a3b7f6	68f5d95d-e7ae-46d3-b836-e741fde98f23.rna_seq.augmented_star_gene_counts.tsv	4261379	cb204d655779e2c95f28f9c2cef06a67	NO_NFE2L2
	TCGA-73-4666	TCGA-73-4666-01A	TCGA-73-4666-01A-01R-1206-07	LUAD	female	7b3f1e0a-2d0a-40a6-9ccd-deb403fd2f16	743f08af-5537-4454-a219-18639e5127c6.rna_seq.augmented_star_gene_counts.tsv	4248825	aa82a61464747826f8e8281c7e2e988b	KEAP1
	TCGA-73-4668	TCGA-73-4668-01A	TCGA-73-4668-01A-01R-1206-07	LUAD	female	239d18cb-2886-48a0-9a3d-76558819dabd	764d71c7-f003-4cf6-851e-1587f12b4a69.rna_seq.augmented_star_gene_counts.tsv	4253354	3f42cf8368155d7d284313b44e60a1ba	NO_NFE2L2
	TCGA-73-4670	TCGA-73-4670-01A	TCGA-73-4670-01A-01R-1206-07	LUAD	female	f4288244-7a1c-4a61-98f6-6c1a06ccde2d	aea4fa60-a890-453e-8ba6-6f4f3d5ed084.rna_seq.augmented_star_gene_counts.tsv	4250592	463ccd6d41090c07ffbe931ff45cae5e	KEAP1
	TCGA-73-4675	TCGA-73-4675-01A	TCGA-73-4675-01A-01R-1206-07	LUAD	male	a60f0ff5-6f4c-43a1-8dda-10b882880bfc	c9494f0c-d6df-4dc9-a174-dfd53f121ee8.rna_seq.augmented_star_gene_counts.tsv	4253892	5d1111de1b542967a55a7b1c333573cf	NO_NFE2L2
	TCGA-73-4676	TCGA-73-4676-01A	TCGA-73-4676-01A-01R-1755-07	LUAD	male	4320b770-69f3-4dd2-afea-8b7f7cdf44c2	32e5ef2b-4387-4d2c-8e62-d18b5106414f.rna_seq.augmented_star_gene_counts.tsv	4227980	ea55d80feb430b5fd58948234d7927f4	KEAP1
	TCGA-73-4677	TCGA-73-4677-01A	TCGA-73-4677-01A-01R-1206-07	LUAD	male	efc4983d-f573-4996-bf5c-5aaa1aafd730	e38af20a-f4f2-40dc-82c0-69782f9192d7.rna_seq.augmented_star_gene_counts.tsv	4247266	90fb3e95ff4f98f566dc67ea2b9739ae	KEAP1
	TCGA-73-7498	TCGA-73-7498-01A	TCGA-73-7498-01A-12R-2187-07	LUAD	female	7181e057-0ec7-410b-b0fe-ff8de3d14d98	d1b10396-1656-4963-8fd0-7d7368c24dd2.rna_seq.augmented_star_gene_counts.tsv	4259835	cbdf59033666adb0a79bee58b2bd3809	KEAP1
	TCGA-73-7499	TCGA-73-7499-01A	TCGA-73-7499-01A-11R-2187-07	LUAD	female	cba15984-128b-4bd9-8202-14afbf1f74b2	9d305ba3-6558-42ed-959c-4182de1c8ebb.rna_seq.augmented_star_gene_counts.tsv	4250510	62f5ab5c4b55a76e11e55032369722bd	NO_NFE2L2
	TCGA-73-A9RS	TCGA-73-A9RS-01A	TCGA-73-A9RS-01A-11R-A41B-07	LUAD	male	f7d58012-79f4-440f-add6-8a00728e96ba	3289364c-0dc2-43e8-bfe2-57d25e8612e5.rna_seq.augmented_star_gene_counts.tsv	4213976	bc165a01e3615b523c65885fb76a7ff8	NO_NFE2L2
	TCGA-75-5122	TCGA-75-5122-01A	TCGA-75-5122-01A-01R-1755-07	LUAD	male	13f74ba9-96c5-4074-9589-3ce0e183c0e9	c649e0cf-b787-4d0c-bab6-d81f7e491b15.rna_seq.augmented_star_gene_counts.tsv	4226785	3ebf73beefd3e40a73d0bbdad01689bc	NO_NFE2L2
	TCGA-75-5125	TCGA-75-5125-01A	TCGA-75-5125-01A-01R-1755-07	LUAD	male	f93cc1fb-b3d9-4b1e-94bf-54e40b505b34	bcb20e91-2931-4694-8268-686aee414fe7.rna_seq.augmented_star_gene_counts.tsv	4233688	6fc380e66aa8f4c63c400d4c8438214e	NO_NFE2L2
	TCGA-75-5126	TCGA-75-5126-01A	TCGA-75-5126-01A-01R-1755-07	LUAD	female	e1638627-67cc-44f9-9a79-6748968a06af	4a1a0323-0cfb-4f33-ba44-0039283f9334.rna_seq.augmented_star_gene_counts.tsv	4222558	4acba7e50acccbeca6654a3eac1dca42	NO_NFE2L2
	TCGA-75-5146	TCGA-75-5146-01A	TCGA-75-5146-01A-01R-1628-07	LUAD	male	62cdda72-a90e-49e7-9423-24540d696049	ed4e21ee-1471-479e-af75-72c91986787a.rna_seq.augmented_star_gene_counts.tsv	4223246	dc44c4bafed2c3e608eb6cb78ec86701	NO_NFE2L2
	TCGA-75-5147	TCGA-75-5147-01A	TCGA-75-5147-01A-01R-1628-07	LUAD	female	a912206f-60e9-4564-9d84-db9c3ee75343	99c5c1c4-851a-42a4-b5a2-dd9da2959343.rna_seq.augmented_star_gene_counts.tsv	4264297	7e1f4be8d5e825666e9bd0339b72fdf5	NO_NFE2L2
	TCGA-75-6203	TCGA-75-6203-01A	TCGA-75-6203-01A-11R-1755-07	LUAD	female	64101504-305f-4c62-bc27-40493e3c9575	5541c1a3-e0e5-4ded-ae0a-687e87a7d708.rna_seq.augmented_star_gene_counts.tsv	4222700	c2d8a1280069d1ae4f6875d99bd94ce3	NO_NFE2L2
	TCGA-75-6205	TCGA-75-6205-01A	TCGA-75-6205-01A-11R-1755-07	LUAD	female	cde8569f-d0a0-4f05-a86e-0f9d84361faf	8929ea12-e12a-4660-ac19-72b4e7bd2e9a.rna_seq.augmented_star_gene_counts.tsv	4215648	9a94b685f7a9b0d1cb1e9a32861b51bc	NO_NFE2L2
	TCGA-75-6206	TCGA-75-6206-01A	TCGA-75-6206-01A-11R-1755-07	LUAD	male	9123a775-d686-49ab-90e7-0dc572c2fcaf	7643fc1a-086e-4ea5-9766-3dde13cc00b4.rna_seq.augmented_star_gene_counts.tsv	4222287	3877efe3d98308858856b402ea9bd066	KEAP1
	TCGA-75-6207	TCGA-75-6207-01A	TCGA-75-6207-01A-11R-1755-07	LUAD	male	576ad342-ce70-4c3c-b69d-8f1f5c4cd358	ee14c1ac-fa18-4be1-b836-a1274abafe28.rna_seq.augmented_star_gene_counts.tsv	4234774	03f28bf9185dd87e30a53a43b1d55010	NO_NFE2L2
	TCGA-75-6211	TCGA-75-6211-01A	TCGA-75-6211-01A-11R-1755-07	LUAD	female	667a9066-debb-4f43-94f7-3277e66d8991	9207fbc6-99eb-4535-8c02-c8bba5875c1b.rna_seq.augmented_star_gene_counts.tsv	4226951	b12e3b5d460ef96e3c17a15e9923d7ec	KEAP1
	TCGA-75-6212	TCGA-75-6212-01A	TCGA-75-6212-01A-11R-1755-07	LUAD	female	bb5264e1-0dbf-4b28-9fbe-0a8602c13369	a787801a-cb3f-4a1f-b14c-ed8f2bfd6028.rna_seq.augmented_star_gene_counts.tsv	4218481	3de80aa07bf3010339966a38a78ba426	NO_NFE2L2
	TCGA-75-6214	TCGA-75-6214-01A	TCGA-75-6214-01A-41R-1949-07	LUAD	female	ef2621f5-ec61-42ee-879f-9d7615372a5e	73fc90cb-2b56-4a6b-8083-42f6647a2478.rna_seq.augmented_star_gene_counts.tsv	4248351	2c7c0763767cfe71f81fcd644e3f8c13	NO_NFE2L2
	TCGA-75-7025	TCGA-75-7025-01A	TCGA-75-7025-01A-12R-1949-07	LUAD	male	0766019a-c9b7-4224-973e-f1cfa16082ac	b6ddcda9-dad4-4e70-b12a-db197a496713.rna_seq.augmented_star_gene_counts.tsv	4259546	f58855fb039b29a30fc9310bbc29613a	NO_NFE2L2
	TCGA-75-7027	TCGA-75-7027-01A	TCGA-75-7027-01A-11R-1949-07	LUAD	male	b7b898c7-f63f-43d3-864a-406e842db2fe	cbfa6fea-3a77-4d0f-ab15-12307d08055a.rna_seq.augmented_star_gene_counts.tsv	4255579	db065f4243af7c973f5fc4a53541a61d	KEAP1
	TCGA-75-7030	TCGA-75-7030-01A	TCGA-75-7030-01A-11R-1949-07	LUAD	male	89785c02-2345-4fa3-b73b-4d9da706c972	e6992421-f34c-4a68-a218-d53f56d0f562.rna_seq.augmented_star_gene_counts.tsv	4219958	9a2ddeed73afde6de9a3021e062ba82c	NO_NFE2L2
	TCGA-75-7031	TCGA-75-7031-01A	TCGA-75-7031-01A-11R-1949-07	LUAD	female	bb69e798-8c83-4c12-b622-3155e1972e6f	aefc9460-27d4-4d7f-8167-baa2a80935b7.rna_seq.augmented_star_gene_counts.tsv	4215818	20672b0f76073b49d354a68d26ec0a68	NO_NFE2L2
	TCGA-78-7143	TCGA-78-7143-01A	TCGA-78-7143-01A-11R-2039-07	LUAD	female	231aa983-3ef3-476b-bdb3-bab9d66f71e6	fb870a60-4b6d-4e83-b366-bdaaca72f205.rna_seq.augmented_star_gene_counts.tsv	4247624	6ecb2809791c9ae0e4970fad5f87a73d	NO_NFE2L2
	TCGA-78-7145	TCGA-78-7145-01A	TCGA-78-7145-01A-11R-2039-07	LUAD	female	50966d1a-3934-4fb5-9fc4-71f399cf5105	db3c11b8-53c7-48f8-a16c-b86c1c7534b0.rna_seq.augmented_star_gene_counts.tsv	4229862	6aba7359e0888e296d8ec44b34741142	NO_NFE2L2
	TCGA-78-7146	TCGA-78-7146-01A	TCGA-78-7146-01A-11R-2039-07	LUAD	female	df03bdab-42a9-4467-a767-b584bb60e926	0a11e8dc-5d34-4fcb-b2dc-aa57b4e90fc9.rna_seq.augmented_star_gene_counts.tsv	4236429	e7d4985402dfcb4759d691ee846fb762	KEAP1
	TCGA-78-7147	TCGA-78-7147-01A	TCGA-78-7147-01A-11R-2039-07	LUAD	female	4dbd91d6-8d7b-4e6d-9dc1-3347c3f3996d	0f6c0159-7342-4519-83f5-52c2d457c4f8.rna_seq.augmented_star_gene_counts.tsv	4246526	2cb02fa475538bf79cc96205bab7d4b3	NO_NFE2L2
	TCGA-78-7148	TCGA-78-7148-01A	TCGA-78-7148-01A-11R-2039-07	LUAD	male	443ccb95-79d0-47ea-9915-18d5bc10eac4	ec3a68ca-1006-4f2f-95b5-74d506ceda86.rna_seq.augmented_star_gene_counts.tsv	4231505	ecb819733c70c92f3d0f2fded167360c	NO_NFE2L2
	TCGA-78-7149	TCGA-78-7149-01A	TCGA-78-7149-01A-11R-2039-07	LUAD	male	c2accf79-6461-4082-b201-c6f881dc6ea2	93f32fe3-cb5b-4910-bf06-e20c876cd8a5.rna_seq.augmented_star_gene_counts.tsv	4232708	578577b59eaa0ad09be187e2d01d1b96	KEAP1
	TCGA-78-7150	TCGA-78-7150-01A	TCGA-78-7150-01A-21R-2039-07	LUAD	male	8a518a19-2c85-42ec-b027-47139aa442d4	14e05372-1acb-4479-904b-ce8acef028eb.rna_seq.augmented_star_gene_counts.tsv	4236191	1b1c74710c48e56bab58f70be921efbd	NO_NFE2L2
	TCGA-78-7152	TCGA-78-7152-01A	TCGA-78-7152-01A-11R-2039-07	LUAD	male	bec02792-06e1-4789-871d-b5b4a5989786	76413057-e8a8-42b7-b545-897e3b32580d.rna_seq.augmented_star_gene_counts.tsv	4211668	6aa40de0b1e1feb49871e65fa303a09e	NO_NFE2L2
	TCGA-78-7153	TCGA-78-7153-01A	TCGA-78-7153-01A-11R-2039-07	LUAD	female	c2371da5-868b-4788-91ec-c9d4bd8d8085	9d2f9191-338e-49ea-a887-a808cdf2703f.rna_seq.augmented_star_gene_counts.tsv	4227525	70b4c9eb00cfeedca229e97fdc895442	KEAP1
	TCGA-78-7154	TCGA-78-7154-01A	TCGA-78-7154-01A-11R-2039-07	LUAD	male	6c66987a-38f6-4125-8ac1-aa55921fcc26	f77f77e1-073c-4f6a-bc48-1ba165ecc024.rna_seq.augmented_star_gene_counts.tsv	4233750	350a2f170bf1813048d9831ce0acb2d1	KEAP1
	TCGA-78-7155	TCGA-78-7155-01A	TCGA-78-7155-01A-11R-2039-07	LUAD	male	d7439e19-2ab4-4209-9628-16e6ae6bc11e	962d56c6-0e10-4b55-9c4d-dbb89c983d74.rna_seq.augmented_star_gene_counts.tsv	4226345	cfa36bedea4886b805883560fdff08ff	NO_NFE2L2
	TCGA-78-7156	TCGA-78-7156-01A	TCGA-78-7156-01A-11R-2039-07	LUAD	male	129f7ee5-6342-4a24-9317-d52462ce6a70	059b5dc1-45f7-4d7c-b07a-878b6db6d881.rna_seq.augmented_star_gene_counts.tsv	4227408	3d36ac641444458dae35b1bc7beed92e	KEAP1
	TCGA-78-7158	TCGA-78-7158-01A	TCGA-78-7158-01A-11R-2039-07	LUAD	female	1d7b2b60-11d7-4803-8c7f-45fc6ce45a25	ebf8d429-0437-4987-9bca-89e62910f168.rna_seq.augmented_star_gene_counts.tsv	4242757	46a9778d735f1b2ecce411b6ede1d919	KEAP1
	TCGA-78-7159	TCGA-78-7159-01A	TCGA-78-7159-01A-11R-2039-07	LUAD	female	e0d8cd2d-967f-4b04-afa9-3aca54bcaf5d	9f030a01-eef7-4885-8edc-316fe88860d7.rna_seq.augmented_star_gene_counts.tsv	4238479	4bd6afc44d7704a09c784d61eb8d0f3a	NO_NFE2L2
	TCGA-78-7160	TCGA-78-7160-01A	TCGA-78-7160-01A-11R-2039-07	LUAD	male	aaa72a07-5214-4145-9fb5-99c22b7c248a	f99ac82f-4fe6-4a9a-9d49-67c42cf66208.rna_seq.augmented_star_gene_counts.tsv	4233406	0b040ed97893575b9e567491d82824f5	NO_NFE2L2
	TCGA-78-7161	TCGA-78-7161-01A	TCGA-78-7161-01A-11R-2039-07	LUAD	female	a35c257e-f8b8-4d58-8ecb-92b1b0bc59f3	35fc369e-6f16-415b-badb-380eedb2157b.rna_seq.augmented_star_gene_counts.tsv	4251651	f56cc45eaf3ca0f661c6b19fc37bf103	NO_NFE2L2
	TCGA-78-7162	TCGA-78-7162-01A	TCGA-78-7162-01A-21R-2066-07	LUAD	male	5edfb99b-ef38-4f97-a59b-efea8738442c	a9a12604-5100-4e45-b7f8-7e7c0d02a139.rna_seq.augmented_star_gene_counts.tsv	4241383	8e3e8f70a7451ca5f8d5560d0eee792b	KEAP1
	TCGA-78-7163	TCGA-78-7163-01A	TCGA-78-7163-01A-12R-2066-07	LUAD	male	669ce970-42a3-4797-bf9c-0de40a021bbf	0832f2ee-ad00-42c7-8cc3-9c63a7b5cea9.rna_seq.augmented_star_gene_counts.tsv	4238136	1a4b67cde878f37fe78ecb8d498135c5	NO_NFE2L2
	TCGA-78-7166	TCGA-78-7166-01A	TCGA-78-7166-01A-12R-2066-07	LUAD	male	41f852c7-01e8-46b3-8082-da2e00a4ef9d	673621c0-f5d4-4eea-a0ae-469214a70e82.rna_seq.augmented_star_gene_counts.tsv	4234798	24b4a006e54a552465c6e84865eefd9b	KEAP1
	TCGA-78-7167	TCGA-78-7167-01A	TCGA-78-7167-01A-11R-2066-07	LUAD	male	4bd86df0-6768-4741-8d01-51fe34dd57fd	bd1e3dcd-31c4-4f7f-8e99-9ad0d1050294.rna_seq.augmented_star_gene_counts.tsv	4253061	1e91674789dcd6a6bcc97d8171893ad9	KEAP1
	TCGA-78-7220	TCGA-78-7220-01A	TCGA-78-7220-01A-11R-2039-07	LUAD	female	1098101e-1770-4055-ae41-d6c15e1c7b90	19853c82-c205-4af9-badd-82946eec14ad.rna_seq.augmented_star_gene_counts.tsv	4239323	53c7ca5b2ef9c8078a6174b9d92e48de	NO_NFE2L2
	TCGA-78-7535	TCGA-78-7535-01A	TCGA-78-7535-01A-11R-2066-07	LUAD	male	ad636e79-be59-4821-8303-7d2e7389b22f	6545e778-687c-4b82-b6b6-b5d438879069.rna_seq.augmented_star_gene_counts.tsv	4241983	9224887fc22623d57544ed20ebfdd384	NO_NFE2L2
	TCGA-78-7536	TCGA-78-7536-01A	TCGA-78-7536-01A-11R-2066-07	LUAD	male	7cf36ebf-b16e-49ac-bcc4-b127b1f2a3da	3dde8e24-6a2b-49ab-b4df-c058f18a3851.rna_seq.augmented_star_gene_counts.tsv	4252365	589cd84827918fc45ee16368ada13790	NO_NFE2L2
	TCGA-78-7537	TCGA-78-7537-01A	TCGA-78-7537-01A-11R-2066-07	LUAD	male	25857230-7253-4929-a790-90815194b213	b6e9752c-ad52-457d-a37c-78ffb7ddc520.rna_seq.augmented_star_gene_counts.tsv	4242305	a4f53cf3e7f9f8af8b7f339c48a83732	NO_NFE2L2
	TCGA-78-7539	TCGA-78-7539-01A	TCGA-78-7539-01A-11R-2066-07	LUAD	female	27884724-a2c0-4b3e-921a-54e5f8bf1faa	59578e5d-b76f-46eb-b5d9-7c90b8a9dbe4.rna_seq.augmented_star_gene_counts.tsv	4249057	a1a6000c45577f0663c459d0900d088f	NO_NFE2L2
	TCGA-78-7540	TCGA-78-7540-01A	TCGA-78-7540-01A-11R-2066-07	LUAD	female	477d7181-e081-4577-ac06-e508b1239989	3d006e45-8ebf-4ba1-b003-13b711c0d0ee.rna_seq.augmented_star_gene_counts.tsv	4242981	b4220339c29454ed50944a54145dda85	NO_NFE2L2
	TCGA-78-7542	TCGA-78-7542-01A	TCGA-78-7542-01A-21R-2066-07	LUAD	male	72d9c332-92e3-4f9c-899d-1de9969b1bd6	6667948a-1834-4572-a1b3-3bc9096650e8.rna_seq.augmented_star_gene_counts.tsv	4245736	bcfe7738574088400654ae1e2e320592	NO_NFE2L2
	TCGA-78-7633	TCGA-78-7633-01A	TCGA-78-7633-01A-11R-2066-07	LUAD	male	0f01f50f-495a-455d-986d-28c65e345a80	06c83065-5800-451a-84a7-7a7f352493ec.rna_seq.augmented_star_gene_counts.tsv	4243547	cbd8ecfb77292db5806d978fdb5b45a5	KEAP1
	TCGA-78-8640	TCGA-78-8640-01A	TCGA-78-8640-01A-11R-2403-07	LUAD	male	169b5555-f64c-4bbd-9c07-af0c42ddb6aa	da145aec-4391-4fce-b5d0-bf91065b765e.rna_seq.augmented_star_gene_counts.tsv	4230800	df198d1635dcb38030f79a8494a55063	NO_NFE2L2
	TCGA-78-8648	TCGA-78-8648-01A	TCGA-78-8648-01A-11R-2403-07	LUAD	female	ab3c7d7c-7ad0-4f26-9991-ddd288598936	5d843590-36a7-4568-88a4-2bc09e14927f.rna_seq.augmented_star_gene_counts.tsv	4222576	e2a5a342800957b223e29d242646d961	NO_NFE2L2
	TCGA-78-8655	TCGA-78-8655-01A	TCGA-78-8655-01A-11R-2403-07	LUAD	female	9940e2a8-6a68-4482-a1bc-2a6edb7d52cd	bc8b6dee-0f79-492f-85e1-c1a09d6f9680.rna_seq.augmented_star_gene_counts.tsv	4226354	adc6e0a31776c8970551d88894e45b24	NO_NFE2L2
	TCGA-78-8660	TCGA-78-8660-01A	TCGA-78-8660-01A-11R-2403-07	LUAD	male	c97d6c2a-9866-4893-8cff-ee747c4a4550	2f8abb88-ae9f-4315-bcad-4263862bd11b.rna_seq.augmented_star_gene_counts.tsv	4231897	50284d5270fbfe9576deaaedefa3337f	NFE2L2
	TCGA-78-8662	TCGA-78-8662-01A	TCGA-78-8662-01A-11R-2403-07	LUAD	female	06a639d9-ade5-4cbb-91b0-a41449ce4f49	6531e137-3d23-44e7-af10-51e9cc517192.rna_seq.augmented_star_gene_counts.tsv	4222257	eadaedb72fe4b6116412cf13b59f5c1c	NO_NFE2L2
	TCGA-80-5607	TCGA-80-5607-01A	TCGA-80-5607-01A-31R-1949-07	LUAD	female	ac9d6b6d-37e9-44ca-9f70-0e6351c39341	2f00871b-1c4a-4fe9-94f6-42493fd95841.rna_seq.augmented_star_gene_counts.tsv	4221147	0c72a81086b0947e78e52aa3804c42d8	NO_NFE2L2
	TCGA-80-5608	TCGA-80-5608-01A	TCGA-80-5608-01A-31R-1949-07	LUAD	female	5695292b-7c39-4ee6-94e8-987f4a456635	3b286ed4-51bd-4a1e-9eab-b0ee9adf3b72.rna_seq.augmented_star_gene_counts.tsv	4242893	1c378789bdaa82ddb2d37b1f4e616d82	KEAP1
	TCGA-80-5611	TCGA-80-5611-01A	TCGA-80-5611-01A-01R-1628-07	LUAD	male	1d8df3eb-b059-47f7-b3fa-f4eb3f568423	d5388d2a-976f-4f08-80c2-14bbf4ccc753.rna_seq.augmented_star_gene_counts.tsv	4230852	c78bc982a993f9721ec0c36af5bcf7fe	NO_NFE2L2
	TCGA-83-5908	TCGA-83-5908-01A	TCGA-83-5908-01A-21R-2287-07	LUAD	female	de0b900f-151a-4173-a070-3ec31ec05aed	62b8c824-3e80-4341-bfee-78d04be904c9.rna_seq.augmented_star_gene_counts.tsv	4247370	67bbea179ba2c0e1c662c82d3ad0d89c	NO_NFE2L2
	TCGA-86-6562	TCGA-86-6562-01A	TCGA-86-6562-01A-11R-1755-07	LUAD	male	a135a2b4-bc6a-4dd6-baa9-f08ab2d4971a	c41a2347-8277-494e-90c6-f1918223388b.rna_seq.augmented_star_gene_counts.tsv	4230666	bbe8127b4e50e5b09375051038cfef2e	NO_NFE2L2
	TCGA-86-6851	TCGA-86-6851-01A	TCGA-86-6851-01A-11R-1949-07	LUAD	female	24fa0c9f-c679-486d-846a-66fbc8d30b0a	32248a54-89ad-43a3-aa20-1c1897cb0054.rna_seq.augmented_star_gene_counts.tsv	4258725	01bfbc4564724c456574a17a4da19615	NO_NFE2L2
	TCGA-86-7701	TCGA-86-7701-01A	TCGA-86-7701-01A-11R-2170-07	LUAD	male	66e79734-9053-4f61-9a32-bee376f5dab0	a4a57e8f-cf4f-4322-b7fe-2336a58cd50f.rna_seq.augmented_star_gene_counts.tsv	4217253	5af58684e4d41816a94ab46ae66f85ca	NO_NFE2L2
	TCGA-86-7711	TCGA-86-7711-01A	TCGA-86-7711-01A-11R-2066-07	LUAD	male	8b071bf3-0d85-4aba-aa46-d0800dcc8640	65a2c4cf-7c84-4ca8-a37e-8deecb6ef026.rna_seq.augmented_star_gene_counts.tsv	4243822	4403164f6654829b70446beb576b2fda	NO_NFE2L2
	TCGA-86-7713	TCGA-86-7713-01A	TCGA-86-7713-01A-11R-2066-07	LUAD	male	db0caa6a-e863-4dad-a911-0c69127be9df	55071ef3-bf09-43a2-a54c-a9ec61a84615.rna_seq.augmented_star_gene_counts.tsv	4255626	1205cb7b4e1f0da5eb3547caf95c3e83	NO_NFE2L2
	TCGA-86-7714	TCGA-86-7714-01A	TCGA-86-7714-01A-12R-2170-07	LUAD	female	4f59681b-3811-4569-aa50-ed031f7e370a	afccc865-1d58-475d-b85c-0d7eca330b0e.rna_seq.augmented_star_gene_counts.tsv	4214409	394fd5a624e37263b39a63413b9e5442	NO_NFE2L2
	TCGA-86-7953	TCGA-86-7953-01A	TCGA-86-7953-01A-11R-2187-07	LUAD	female	8be349eb-2407-4f51-809a-ceb5542e0cf1	256e320c-e4de-4918-b3bc-b71657bfd4cc.rna_seq.augmented_star_gene_counts.tsv	4252757	77a79da00de4bb1ffffe7d9e42395594	NO_NFE2L2
	TCGA-86-7954	TCGA-86-7954-01A	TCGA-86-7954-01A-11R-2187-07	LUAD	female	cb59cd67-2756-45e1-80c7-67ad6d6823d4	d0966b4b-6c70-41f6-a220-4bf8be955366.rna_seq.augmented_star_gene_counts.tsv	4261106	c0aee93101616db06b16450401fb1616	NO_NFE2L2
	TCGA-86-7955	TCGA-86-7955-01A	TCGA-86-7955-01A-11R-2187-07	LUAD	male	97541ffe-94e7-4130-9bac-65528de8d6f5	c4115468-0566-49e2-a86f-9c7faf6388f5.rna_seq.augmented_star_gene_counts.tsv	4246611	045d74c1879f0e7d28551f80a97be495	NO_NFE2L2
	TCGA-86-8054	TCGA-86-8054-01A	TCGA-86-8054-01A-11R-2241-07	LUAD	male	51c0568a-3e54-42a0-b805-0a90905cc865	b8ae4b22-83b8-4cbf-9d3c-49092b7e0903.rna_seq.augmented_star_gene_counts.tsv	4248243	f09d3d552cccd909ac125dafe5b52032	NO_NFE2L2
	TCGA-86-8055	TCGA-86-8055-01A	TCGA-86-8055-01A-11R-2241-07	LUAD	male	9bdba133-a1e0-4482-add2-af6493ebdbe5	efd3731a-0788-41e9-a985-0c3d400d7db3.rna_seq.augmented_star_gene_counts.tsv	4255895	b52cccec81de7f9317435955cb308ae1	NO_NFE2L2
	TCGA-86-8056	TCGA-86-8056-01A	TCGA-86-8056-01A-11R-2241-07	LUAD	female	990303de-eff3-4418-b305-9bf63236826f	593623b6-0f7d-4089-8697-518c573c86c6.rna_seq.augmented_star_gene_counts.tsv	4263480	c916a952c9cf5f9fa90707190b35eaf3	NO_NFE2L2
	TCGA-86-8073	TCGA-86-8073-01A	TCGA-86-8073-01A-11R-2241-07	LUAD	male	08d83462-5fcb-40c6-9d44-dbc42faa4df6	087c2c93-d071-41e1-a2e8-a1961ba54a86.rna_seq.augmented_star_gene_counts.tsv	4267029	7e0d04eb337f163632590bbd665fabaf	NO_NFE2L2
	TCGA-86-8074	TCGA-86-8074-01A	TCGA-86-8074-01A-11R-2241-07	LUAD	female	64c35a37-5b92-4e2e-831d-9bbe50401dd5	f6f15b7f-1af0-4da5-8ca5-a4b488d8f412.rna_seq.augmented_star_gene_counts.tsv	4264421	775b0378100731e2d5626c2b44f14b1d	NO_NFE2L2
	TCGA-86-8075	TCGA-86-8075-01A	TCGA-86-8075-01A-11R-2241-07	LUAD	female	51054c11-8e2f-4f52-bdaf-ebb515508a28	5158a031-b856-4423-9418-031b3107e88f.rna_seq.augmented_star_gene_counts.tsv	4258291	b1ff3cf25bf73c2cdbda898c85e37778	NO_NFE2L2
	TCGA-86-8076	TCGA-86-8076-01A	TCGA-86-8076-01A-31R-2241-07	LUAD	male	dd6ec250-8d4d-4129-9664-7451c1760f4b	34774d7b-1184-4b5f-b6a9-e16c428ca7ce.rna_seq.augmented_star_gene_counts.tsv	4247563	8505bede89020ffab8d5e66975dec03a	NO_NFE2L2
	TCGA-86-8278	TCGA-86-8278-01A	TCGA-86-8278-01A-11R-2287-07	LUAD	female	4b98f37e-33fc-4bf0-b6cd-4c900bcc9d2a	925a2268-1a0a-402b-8bb1-e6fa32521afe.rna_seq.augmented_star_gene_counts.tsv	4261607	d0cb9fbf2c1f7bcd989ff9d52c6fecd6	NO_NFE2L2
	TCGA-86-8279	TCGA-86-8279-01A	TCGA-86-8279-01A-11R-2287-07	LUAD	male	5dd8168d-fe35-4a32-8520-1deaef953b10	53244201-6282-42ea-9da4-31524ca39bf8.rna_seq.augmented_star_gene_counts.tsv	4254633	25e705bada4449307884203cd694067f	NO_NFE2L2
	TCGA-86-8280	TCGA-86-8280-01A	TCGA-86-8280-01A-11R-2287-07	LUAD	female	afa5c7c4-02f8-4417-873c-378937f5fbbb	9aa5eb7d-1d54-47f6-aeeb-59be4880f004.rna_seq.augmented_star_gene_counts.tsv	4254670	140ea4447340fa927763cbdbb19294c3	NO_NFE2L2
	TCGA-86-8281	TCGA-86-8281-01A	TCGA-86-8281-01A-11R-2287-07	LUAD	male	bbbd3cd5-cfd3-418b-ab3a-243de430a5e1	3e5fa22c-f02a-4da4-881c-6aa2869058c1.rna_seq.augmented_star_gene_counts.tsv	4245859	bf0dec795bf24b3a857db6ac3f782885	KEAP1
	TCGA-86-8358	TCGA-86-8358-01A	TCGA-86-8358-01A-11R-2326-07	LUAD	male	5ecec8fc-845f-43cf-82c3-73dea85cc53c	461cd8f2-fe53-448d-b6a9-0a95792464c7.rna_seq.augmented_star_gene_counts.tsv	4235780	c6db66bee178f64bc449e8cb0e0eb01b	KEAP1
	TCGA-86-8359	TCGA-86-8359-01A	TCGA-86-8359-01A-11R-2326-07	LUAD	male	bae501f3-c0ba-4646-8027-0623869176f4	c6fcbf56-bc49-43eb-981a-ef032465a7ce.rna_seq.augmented_star_gene_counts.tsv	4227137	c86025add8ba385b1c7ff06a77deb2f8	NO_NFE2L2
	TCGA-86-8585	TCGA-86-8585-01A	TCGA-86-8585-01A-11R-2403-07	LUAD	male	71ac888b-0acc-4cfd-a21a-4c9ff8d06bf9	bd84bab3-4614-4806-bfd1-dab3fca9d6fa.rna_seq.augmented_star_gene_counts.tsv	4228970	df571b77146fc739adb1b5b1878a9bdb	NO_NFE2L2
	TCGA-86-8668	TCGA-86-8668-01A	TCGA-86-8668-01A-11R-2403-07	LUAD	female	7f9624e7-0e7b-4a2b-8413-1737f0f7c1d0	8e1fcc77-bf23-42e4-949f-d429f7211dd6.rna_seq.augmented_star_gene_counts.tsv	4226727	29785b75fe3e6352aecc7a29fd84be79	NO_NFE2L2
	TCGA-86-8669	TCGA-86-8669-01A	TCGA-86-8669-01A-11R-2403-07	LUAD	male	508c6166-6095-4133-a42a-79d75b0c0e31	eda17fff-892d-440a-af83-b353ea60c478.rna_seq.augmented_star_gene_counts.tsv	4226735	948c8e8fd151abfdd683c0e7ea11fc89	NO_NFE2L2
	TCGA-86-8671	TCGA-86-8671-01A	TCGA-86-8671-01A-11R-2403-07	LUAD	female	58390e08-43b2-4517-b57c-ff899594e55a	80416b83-9ea2-4d33-8ba4-1fe9330d51f2.rna_seq.augmented_star_gene_counts.tsv	4239310	d44b998211ce7aeb8fcf1125605ec9e1	NO_NFE2L2
	TCGA-86-8672	TCGA-86-8672-01A	TCGA-86-8672-01A-21R-2403-07	LUAD	male	3362c701-3af3-4947-983a-6039b67d1526	fcfff41c-378f-49e8-b416-ccd1b9d8b4b4.rna_seq.augmented_star_gene_counts.tsv	4221810	997bb80dda476a020c122e040ca3e2c5	KEAP1
	TCGA-86-8673	TCGA-86-8673-01A	TCGA-86-8673-01A-11R-2403-07	LUAD	male	ece9f585-2710-4e10-b292-c5fbf588eda9	79e12f4d-94d7-45f8-b251-6b0fcbb6b885.rna_seq.augmented_star_gene_counts.tsv	4229944	0439fc52e9a319d25dc61451101f655b	NO_NFE2L2
	TCGA-86-8674	TCGA-86-8674-01A	TCGA-86-8674-01A-21R-2403-07	LUAD	male	3604ee2d-3fdc-40fa-95ab-a3f420334ac5	7ecd6087-9663-4d9d-828d-d9e9b5241c3c.rna_seq.augmented_star_gene_counts.tsv	4223513	e54ee6eb012e144e17a1dc46f773e1dd	KEAP1
	TCGA-86-A456	TCGA-86-A456-01A	TCGA-86-A456-01A-11R-A24H-07	LUAD	female	52d91ece-345c-4c5d-800a-121955b93c66	91e79d93-01a8-4908-805a-12678d68a543.rna_seq.augmented_star_gene_counts.tsv	4235935	37abd7a06ebbf7e3fc3457af2eecbe5c	NO_NFE2L2
	TCGA-86-A4D0	TCGA-86-A4D0-01A	TCGA-86-A4D0-01A-11R-A24H-07	LUAD	male	15a57d06-841c-473e-b89e-389f1df3504a	c812eb06-bd41-4919-8f6d-9ade00654a4c.rna_seq.augmented_star_gene_counts.tsv	4239650	321369cd62597fdbf015bbb7256a58f1	NO_NFE2L2
	TCGA-86-A4JF	TCGA-86-A4JF-01A	TCGA-86-A4JF-01A-11R-A24X-07	LUAD	male	2c81c69f-e08a-4586-b3f9-33d4af417d1f	2a05b2c0-f94d-4c07-889a-def7131895bd.rna_seq.augmented_star_gene_counts.tsv	4236318	f85e0931c72e5c305094f162a75fbeda	NO_NFE2L2
	TCGA-86-A4P7	TCGA-86-A4P7-01A	TCGA-86-A4P7-01A-11R-A24X-07	LUAD	female	0c09a94d-8885-49fb-91c1-aa0ebf52386a	f57240f6-a5e4-4a9f-81d7-b59616d865dd.rna_seq.augmented_star_gene_counts.tsv	4247849	56de3d04eb108c90826420c173cf9e2b	NO_NFE2L2
	TCGA-86-A4P8	TCGA-86-A4P8-01A	TCGA-86-A4P8-01A-11R-A24X-07	LUAD	female	1c5de7db-7e05-4289-ace6-b59b6e2392e7	e0e9a0df-7052-4d42-b3fd-10ee23ceae62.rna_seq.augmented_star_gene_counts.tsv	4248454	d1837ef5ddfec327343cc413cc69aa86	NO_NFE2L2
	TCGA-91-6828	TCGA-91-6828-01A	TCGA-91-6828-01A-11R-1858-07	LUAD	male	afdf58d1-5814-4e78-a92e-26fbcc97da32	0a5dab01-33ff-41d1-8842-7b7f18a6efe0.rna_seq.augmented_star_gene_counts.tsv	4219971	96f4226c5a485e5eee3a6156d4b4ba05	NO_NFE2L2
	TCGA-91-6829	TCGA-91-6829-01A	TCGA-91-6829-01A-21R-1858-07	LUAD	male	ffec28dd-cc44-4057-bcc3-ccc0cd2331c2	d21d91e9-6e19-4c5f-aa2e-cdd41d98e542.rna_seq.augmented_star_gene_counts.tsv	4236967	ea7b5b0033e14dc6c804d58059f6ac0c	NO_NFE2L2
	TCGA-91-6830	TCGA-91-6830-01A	TCGA-91-6830-01A-11R-1949-07	LUAD	female	472406b3-cc1a-407e-bf38-a79046cfa952	07c8891d-1917-45f8-bd1d-4c59d1baafaa.rna_seq.augmented_star_gene_counts.tsv	4231226	4207f7261449c27bb4c583a825e1fd6d	NO_NFE2L2
	TCGA-91-6831	TCGA-91-6831-01A	TCGA-91-6831-01A-11R-1858-07	LUAD	male	14d76abd-84f2-4875-8d03-5a27b4505715	56d7d6b5-33c0-4551-967c-afce1f970395.rna_seq.augmented_star_gene_counts.tsv	4230456	bb0154dc392468a8e4ee8ab354eb3966	CUL3
	TCGA-91-6835	TCGA-91-6835-01A	TCGA-91-6835-01A-11R-1858-07	LUAD	female	8e14dba9-6132-483c-892b-b244704fdc38	9343d3bd-0f60-49c3-8625-31a8a7a846c4.rna_seq.augmented_star_gene_counts.tsv	4245632	ad64263c4428fbc208bb34e0a5d2e362	NO_NFE2L2
	TCGA-91-6836	TCGA-91-6836-01A	TCGA-91-6836-01A-21R-1858-07	LUAD	female	e7ae9253-4c2d-41bd-9d3a-c37e9841f479	186b7ed8-cc25-45b6-bf7d-25d7a3a2154a.rna_seq.augmented_star_gene_counts.tsv	4233633	1a88bab62fc5a34f5481e2ae15839071	NO_NFE2L2
	TCGA-91-6840	TCGA-91-6840-01A	TCGA-91-6840-01A-11R-1949-07	LUAD	female	94861d8a-3b40-4334-9fb5-c9df71a1e1da	8c55ee80-c8c3-4196-9b67-81732fffe9f4.rna_seq.augmented_star_gene_counts.tsv	4228528	1adb811f44e89845340404914895f12c	NO_NFE2L2
	TCGA-91-6847	TCGA-91-6847-01A	TCGA-91-6847-01A-11R-1949-07	LUAD	female	32046abb-8476-4e4f-8090-1ce003107490	905e32cb-a5bd-46a4-ac0f-32585e042695.rna_seq.augmented_star_gene_counts.tsv	4243351	43f5599ac6d7d205ec1dab3485e9319b	NO_NFE2L2
	TCGA-91-6848	TCGA-91-6848-01A	TCGA-91-6848-01A-11R-1949-07	LUAD	male	3d08a99f-46c1-4e06-a042-521a54ebbe1e	02f6c9d4-8296-4e00-9e78-4f4d8c942340.rna_seq.augmented_star_gene_counts.tsv	4226383	ac1df830521fd8fc154b3a640bed941c	CUL3_KEAP1
	TCGA-91-6849	TCGA-91-6849-01A	TCGA-91-6849-01A-11R-1949-07	LUAD	female	ad8bf3fe-2831-4c1c-81f9-c65e09b2d45e	34d64c67-b35b-418e-a7b2-759804876762.rna_seq.augmented_star_gene_counts.tsv	4213808	6367a7f9e1c6082c9ed940caa1751941	KEAP1
	TCGA-91-7771	TCGA-91-7771-01A	TCGA-91-7771-01A-11R-2170-07	LUAD	male	a4ed7fd8-e220-46e6-90f7-3b208dbf4e05	9f4c2cc8-8675-43be-98bb-004c45ba5a51.rna_seq.augmented_star_gene_counts.tsv	4237269	95ae46920b3248fa70bdcaf05e514ef3	NO_NFE2L2
	TCGA-91-8496	TCGA-91-8496-01A	TCGA-91-8496-01A-11R-2403-07	LUAD	female	12f5eaa4-9f64-4465-bfa6-3d9307e9f980	2f966635-6a77-4205-9bab-df5940a973aa.rna_seq.augmented_star_gene_counts.tsv	4218314	914d8ad3782376433aefd88dc523a086	NO_NFE2L2
	TCGA-91-8497	TCGA-91-8497-01A	TCGA-91-8497-01A-11R-2403-07	LUAD	female	65f85615-96a2-4b3c-ac05-ab67d0bf9e99	ff36264d-8485-46e6-8259-0b55f651ed8f.rna_seq.augmented_star_gene_counts.tsv	4234091	db2fbef479705f91deb9fbe10231bb1c	NO_NFE2L2
	TCGA-91-8499	TCGA-91-8499-01A	TCGA-91-8499-01A-11R-2403-07	LUAD	female	249b6388-cdcd-477a-9461-cf0e41146230	6200626d-556e-400d-81f4-e397ce49585f.rna_seq.augmented_star_gene_counts.tsv	4233610	c065c6c3f335c1e1fab9679aba836eed	NO_NFE2L2
	TCGA-91-A4BC	TCGA-91-A4BC-01A	TCGA-91-A4BC-01A-11R-A24H-07	LUAD	male	32876f27-f304-4be0-8881-f9842a9fbb67	e8ea2e59-65dc-49c9-b6f3-b9335185390d.rna_seq.augmented_star_gene_counts.tsv	4234856	34c30f39f393a6132d290119e8b092cd	NO_NFE2L2
	TCGA-91-A4BD	TCGA-91-A4BD-01A	TCGA-91-A4BD-01A-11R-A24H-07	LUAD	male	1529d8e6-10d2-4e7c-bfb1-66820434c835	40386f32-719d-480f-9ba7-57e1eea23b30.rna_seq.augmented_star_gene_counts.tsv	4217734	017185517e6f67b97f45eb2f0df21e2e	NO_NFE2L2
	TCGA-93-7347	TCGA-93-7347-01A	TCGA-93-7347-01A-11R-2187-07	LUAD	female	45fe5e83-1e4a-4e0a-ac03-62ef32a90e77	6b51d2ce-51ed-4b34-890d-9f83d363118c.rna_seq.augmented_star_gene_counts.tsv	4246904	31eeb6845913da77fef24ca097fc7eee	NO_NFE2L2
	TCGA-93-7348	TCGA-93-7348-01A	TCGA-93-7348-01A-21R-2039-07	LUAD	female	bfecde55-3ed3-4977-899b-d7c22b6df15b	b7f9da49-2a09-4f32-af6c-980ccf75250b.rna_seq.augmented_star_gene_counts.tsv	4235711	239eea2e924502ba36ce92b9e8d0a04b	NO_NFE2L2
	TCGA-93-8067	TCGA-93-8067-01A	TCGA-93-8067-01A-11R-2287-07	LUAD	male	d86a1079-2f10-4c42-9b6a-14498715c4ad	a8d269f5-ebc9-4b2a-9cd9-7019204a246f.rna_seq.augmented_star_gene_counts.tsv	4250409	9b5186c451573de3055e2e0c40cefd0b	NO_NFE2L2
	TCGA-93-A4JN	TCGA-93-A4JN-01A	TCGA-93-A4JN-01A-11R-A24X-07	LUAD	male	1aff8a31-97b2-4bde-ac5a-f3a958bf74dc	068ba2ae-288c-446d-8d17-72445ce4f788.rna_seq.augmented_star_gene_counts.tsv	4254264	982bd67720ebee06f2f617268a1109e6	NO_NFE2L2
	TCGA-93-A4JO	TCGA-93-A4JO-01A	TCGA-93-A4JO-01A-21R-A24X-07	LUAD	male	2ab0f01f-2f66-4489-9de7-2a0d61b6ea04	4822db97-46d7-4302-bef9-63086b777e9c.rna_seq.augmented_star_gene_counts.tsv	4245788	6ce1dc70e3830a2b4dd0ad2a6c0b55ed	NO_NFE2L2
	TCGA-93-A4JP	TCGA-93-A4JP-01A	TCGA-93-A4JP-01A-11R-A24X-07	LUAD	male	de82c428-0b33-48e0-a337-42ac0a434a24	b4a1a796-8bce-4b44-b4ed-fd7bf4c81b3b.rna_seq.augmented_star_gene_counts.tsv	4252190	31eee9eab94024bd6b8c57b901685f23	NO_NFE2L2
	TCGA-93-A4JQ	TCGA-93-A4JQ-01A	TCGA-93-A4JQ-01A-11R-A24X-07	LUAD	male	44d8e988-1a2b-4588-a64a-cf5a6c164e03	71809317-f775-4faa-b1c6-40bae85c69aa.rna_seq.augmented_star_gene_counts.tsv	4256464	e64e8b3dc34a42bcb1239702ab82508f	NO_NFE2L2
	TCGA-95-7039	TCGA-95-7039-01A	TCGA-95-7039-01A-11R-1949-07	LUAD	female	8fadb6d4-de92-4301-9b6e-7dd857fec978	e9efd91b-8824-456b-b650-1d0287efbbe8.rna_seq.augmented_star_gene_counts.tsv	4223282	bbbc217a5b46b7d27f4f894e02f09994	NO_NFE2L2
	TCGA-95-7043	TCGA-95-7043-01A	TCGA-95-7043-01A-11R-1949-07	LUAD	female	d3f1b81f-37ce-47b6-b98d-8530076007c7	d067f93b-7182-4a34-ba8e-be73589b7420.rna_seq.augmented_star_gene_counts.tsv	4215312	0384bee9b454152ea2204060a5fcb6a9	CUL3_KEAP1
	TCGA-95-7562	TCGA-95-7562-01A	TCGA-95-7562-01A-11R-2241-07	LUAD	male	d2000aa0-a3c5-4155-8995-80ec5f4436e2	020a2284-03f3-4439-89bb-2292ebc3ecd2.rna_seq.augmented_star_gene_counts.tsv	4246603	cf29acfeda74cebe6a90cfb1437efcab	NO_NFE2L2
	TCGA-95-7567	TCGA-95-7567-01A	TCGA-95-7567-01A-11R-2066-07	LUAD	male	b5b25f89-cd67-44e5-89bd-be2bc1def4d8	4ad05e6b-e3d8-4048-8f61-1e79e421de0b.rna_seq.augmented_star_gene_counts.tsv	4246173	412b3360f6579bd180f830e50bd0e4f2	NO_NFE2L2
	TCGA-95-7944	TCGA-95-7944-01A	TCGA-95-7944-01A-11R-2187-07	LUAD	male	a14f02d4-6d07-409d-af7a-5d5f23640ad6	56081bb7-480c-446f-9e21-41627df3b569.rna_seq.augmented_star_gene_counts.tsv	4242102	2e1a8ae5832ddda9dbc8ed7f12addd27	NO_NFE2L2
	TCGA-95-7947	TCGA-95-7947-01A	TCGA-95-7947-01A-11R-2187-07	LUAD	male	8a898b7d-6f1b-4d2a-9f5d-0751ced1d7bf	da3718fb-d874-4469-a3fe-6ba6fa89676b.rna_seq.augmented_star_gene_counts.tsv	4251615	85f974d8960b4355be1844545895f0a3	KEAP1
	TCGA-95-7948	TCGA-95-7948-01A	TCGA-95-7948-01A-11R-2187-07	LUAD	female	218eb2f2-24b1-4e41-9071-26ed97a2edc1	5eef868d-7c7f-42e8-aabf-ce3f75405c7a.rna_seq.augmented_star_gene_counts.tsv	4248267	df3f48d8f8402b70c03f22efc30844dc	NO_NFE2L2
	TCGA-95-8039	TCGA-95-8039-01A	TCGA-95-8039-01A-11R-2241-07	LUAD	male	030d778f-ecb4-44eb-8baa-4286e18c9fdd	84595c09-6f85-4a1d-98fa-7d9bc9dc2c28.rna_seq.augmented_star_gene_counts.tsv	4258957	6426942030ce73573fdeeee6177bf117	NO_NFE2L2
	TCGA-95-8494	TCGA-95-8494-01A	TCGA-95-8494-01A-11R-2326-07	LUAD	male	b7006975-82c2-4fcc-855d-5ef024ef3d4f	b70dcd97-e1e4-417c-a05f-b37acdde6684.rna_seq.augmented_star_gene_counts.tsv	4224562	1fce4e7138b85e38aa13710c8e01bc00	NO_NFE2L2
	TCGA-95-A4VK	TCGA-95-A4VK-01A	TCGA-95-A4VK-01A-11R-A262-07	LUAD	female	b6c69243-9731-4578-b037-ac997cbdc7dc	2306a9ab-37ae-4dfd-b992-4f62022c3d4c.rna_seq.augmented_star_gene_counts.tsv	4244236	b50857213b4d430cfd349ff5b717b473	NO_NFE2L2
	TCGA-95-A4VN	TCGA-95-A4VN-01A	TCGA-95-A4VN-01A-11R-A262-07	LUAD	female	d84121c5-5421-43a4-825a-40f357ecc97b	2b99d8d7-f329-4fe6-97b5-167953311755.rna_seq.augmented_star_gene_counts.tsv	4239370	c97bfcd9f0bf53810f280aa331cf062b	NO_NFE2L2
	TCGA-95-A4VP	TCGA-95-A4VP-01A	TCGA-95-A4VP-01A-21R-A262-07	LUAD	female	a5e1a78c-7e7a-41e8-8c45-872028f6b5a0	f3df8eaf-1fd2-4e08-ad48-ce5aa1d64e19.rna_seq.augmented_star_gene_counts.tsv	4237963	8c4001334cd5c6c75047c18a58a1d81a	NO_NFE2L2
	TCGA-97-7546	TCGA-97-7546-01A	TCGA-97-7546-01A-11R-2039-07	LUAD	female	6bec00ac-81d0-4f29-bb4d-99102992914c	0326e97a-2ec7-4038-98f3-03d94962d869.rna_seq.augmented_star_gene_counts.tsv	4241905	a733db7feddb683bbf4ce002ae40c570	NO_NFE2L2
	TCGA-97-7547	TCGA-97-7547-01A	TCGA-97-7547-01A-11R-2039-07	LUAD	female	7f70c9bb-a18a-45e8-8177-34145a6c0dc9	20cddb4c-1ad4-4f0e-bd5e-3071f573b2d0.rna_seq.augmented_star_gene_counts.tsv	4239315	e7512faf47de2531589223ea5ed87cb7	NO_NFE2L2
	TCGA-97-7552	TCGA-97-7552-01A	TCGA-97-7552-01A-11R-2039-07	LUAD	male	932ccb56-ad41-40a0-9ab3-21f490c60af5	a7c58df0-fffc-4a80-85c4-2dab24b2edc2.rna_seq.augmented_star_gene_counts.tsv	4243811	e37b951d9ce5c8bee53247c5f4d80955	NO_NFE2L2
	TCGA-97-7553	TCGA-97-7553-01A	TCGA-97-7553-01A-21R-2039-07	LUAD	female	8a2d17e2-4ec1-42b6-8825-6d80ffe4b916	c55c7a04-580b-43e3-b138-f83bd3003875.rna_seq.augmented_star_gene_counts.tsv	4246077	3ae4db513b7145d279c112ff61e2b892	NO_NFE2L2
	TCGA-97-7554	TCGA-97-7554-01A	TCGA-97-7554-01A-11R-2039-07	LUAD	female	f19a1a66-ddc9-4567-80db-d009bb455b25	aa305f5b-4c1d-4bc7-81d5-b2b999b327af.rna_seq.augmented_star_gene_counts.tsv	4236361	e0a0a3d05dc990239425b5fe3b6785f1	NO_NFE2L2
	TCGA-97-7937	TCGA-97-7937-01A	TCGA-97-7937-01A-11R-2170-07	LUAD	male	6508912f-5f91-43e6-8e63-9233bf3e81eb	d1eba37d-0b00-47f4-a7c8-d2e80ec3e27b.rna_seq.augmented_star_gene_counts.tsv	4240750	454d329deb52bdfe0de142d001cec544	NO_NFE2L2
	TCGA-97-7938	TCGA-97-7938-01A	TCGA-97-7938-01A-11R-2170-07	LUAD	female	86757083-5e47-423f-91e3-5f2ad6779b27	c16f63fb-a468-48e8-b679-6e26b8457530.rna_seq.augmented_star_gene_counts.tsv	4233079	fc50c91eedc412167f657a917285cbf8	NO_NFE2L2
	TCGA-97-7941	TCGA-97-7941-01A	TCGA-97-7941-01A-11R-2187-07	LUAD	female	d4eb86d5-1952-449c-a5d7-20ccc04f0d07	56c858be-3637-4ba0-81be-208a3edac992.rna_seq.augmented_star_gene_counts.tsv	4256612	09fa4e80ada213d9fb4f10000bc78083	NFE2L2
	TCGA-97-8171	TCGA-97-8171-01A	TCGA-97-8171-01A-11R-2287-07	LUAD	male	de38d138-723c-4256-98f4-2788f7cf1e87	98f4637a-4953-4f52-b90a-c768d005a3e7.rna_seq.augmented_star_gene_counts.tsv	4250139	23ea2782b589de813060a48515ca3d5a	NO_NFE2L2
	TCGA-97-8172	TCGA-97-8172-01A	TCGA-97-8172-01A-11R-2287-07	LUAD	female	942673a7-5072-466f-985c-42d38aeb5c2c	145db6c5-f7ad-4e2f-88f1-d68bc457848a.rna_seq.augmented_star_gene_counts.tsv	4266679	510c95ee4efb8e39011f66d20495ded5	NO_NFE2L2
	TCGA-97-8174	TCGA-97-8174-01A	TCGA-97-8174-01A-11R-2287-07	LUAD	male	16dc015e-0f5b-4278-a0cb-9ae30a280161	d38959c4-8069-4963-8eca-0c66699df9a7.rna_seq.augmented_star_gene_counts.tsv	4259938	d6daf104acf07036686c443c01d44d20	NFE2L2
	TCGA-97-8175	TCGA-97-8175-01A	TCGA-97-8175-01A-11R-2287-07	LUAD	female	6525f4e0-ba79-4576-89b3-df0ab6e45309	a5f6ddd7-f795-4920-b714-ed86942953e3.rna_seq.augmented_star_gene_counts.tsv	4245794	6a687e24eaaf5e56dec613cc190c04be	NO_NFE2L2
	TCGA-97-8176	TCGA-97-8176-01A	TCGA-97-8176-01A-11R-2403-07	LUAD	male	f201ba16-5cb7-42d0-9865-e413fffa3532	8fa3359f-1e40-448a-aae8-a955c1ca3323.rna_seq.augmented_star_gene_counts.tsv	4233317	7f325759820eec2b59903b524ead48b9	KEAP1
	TCGA-97-8177	TCGA-97-8177-01A	TCGA-97-8177-01A-11R-2287-07	LUAD	female	0e6fc8f1-34ca-4f3b-9d71-5a867e5efb07	4b6c958a-7e20-4b88-b30a-2406b123c8c1.rna_seq.augmented_star_gene_counts.tsv	4254329	022f28a4f04b559648f8f5f06bc13c55	NO_NFE2L2
	TCGA-97-8179	TCGA-97-8179-01A	TCGA-97-8179-01A-11R-2287-07	LUAD	male	2e2eb2df-d002-49ac-86e7-5ed33e9eabf3	131c0149-e810-4004-97e0-6c8a4aa9049d.rna_seq.augmented_star_gene_counts.tsv	4244383	c9ad67e843621907d9ad9c8db7cebbc7	KEAP1
	TCGA-97-8547	TCGA-97-8547-01A	TCGA-97-8547-01A-11R-2403-07	LUAD	female	bb47dbbf-75f5-4bbf-bd1a-ca81383f211b	2beab6d3-563d-421f-bf4a-7e1f843ec637.rna_seq.augmented_star_gene_counts.tsv	4226091	1b6d55b7b00ed84a78c2704a3581775c	NO_NFE2L2
	TCGA-97-8552	TCGA-97-8552-01A	TCGA-97-8552-01A-11R-2403-07	LUAD	female	63f5b69e-2307-4be6-98e4-b0f57b6394d0	c8bfb715-4c7a-4e3e-baa2-bc842d80654b.rna_seq.augmented_star_gene_counts.tsv	4238271	b313bb91df790ee85c2b40fa2b28fc1b	NO_NFE2L2
	TCGA-97-A4LX	TCGA-97-A4LX-01A	TCGA-97-A4LX-01A-11R-A24X-07	LUAD	male	0f37f5ba-3582-4c61-8c70-bf9b0ede6e71	2276a330-e86b-46e1-be45-ae41d217ef66.rna_seq.augmented_star_gene_counts.tsv	4246181	a9560eb9da63cad136a7c1a21a3a743d	NO_NFE2L2
	TCGA-97-A4M0	TCGA-97-A4M0-01A	TCGA-97-A4M0-01A-11R-A24X-07	LUAD	female	4e27513c-172b-4d19-a397-ade6df353e6c	20ecdb2d-16ad-437b-ac0e-b84339c769a6.rna_seq.augmented_star_gene_counts.tsv	4242933	5db0662ae2c4c127c8f9d98337541c17	NO_NFE2L2
	TCGA-97-A4M1	TCGA-97-A4M1-01A	TCGA-97-A4M1-01A-11R-A24X-07	LUAD	female	b53ceb0c-a338-46e2-a0e6-224dec5ea807	05ca3ffd-a4d9-4667-80e2-d15125e88f7c.rna_seq.augmented_star_gene_counts.tsv	4244751	69d2dbba24a9e6dcd8d1a224289dc053	NO_NFE2L2
	TCGA-97-A4M2	TCGA-97-A4M2-01A	TCGA-97-A4M2-01A-12R-A24X-07	LUAD	male	270a13b3-158c-4251-8c6a-5bc5275e0ebb	8da65700-04c7-444d-826e-ec2e692b257b.rna_seq.augmented_star_gene_counts.tsv	4249135	f8a4993be2110f354fde8c4ce7919eb1	NO_NFE2L2
	TCGA-97-A4M3	TCGA-97-A4M3-01A	TCGA-97-A4M3-01A-11R-A24X-07	LUAD	female	92b4ef29-b45a-4ec4-9251-8d6fb32cde90	fddbde25-7d5c-496f-8f62-985dbda7e0fe.rna_seq.augmented_star_gene_counts.tsv	4232546	0a3deb502b834cbbf47befc5c9771035	KEAP1
	TCGA-97-A4M5	TCGA-97-A4M5-01A	TCGA-97-A4M5-01A-11R-A24X-07	LUAD	male	f90939c7-6e24-4aa5-8c34-c1fc1b79e485	07c5dadf-e801-4c1f-9109-7a2495407c75.rna_seq.augmented_star_gene_counts.tsv	4249992	e1c6b552afd94863fc737dc4c5856637	NO_NFE2L2
	TCGA-97-A4M6	TCGA-97-A4M6-01A	TCGA-97-A4M6-01A-11R-A24X-07	LUAD	female	975121d2-ba5d-4b2c-bd50-278311c7144a	143cbdd4-689e-4ba9-b0ad-069629dc7dfa.rna_seq.augmented_star_gene_counts.tsv	4245159	183d0ae0ff94b26d27b2579096f3a782	NO_NFE2L2
	TCGA-97-A4M7	TCGA-97-A4M7-01A	TCGA-97-A4M7-01A-11R-A24X-07	LUAD	male	656fd74d-49d8-40a5-8eb9-dac0fbe4ea2d	131b98d5-aaf4-4a6c-bb96-c33895cd814a.rna_seq.augmented_star_gene_counts.tsv	4253351	09aa4903a42a22afa8ffbef01f6e7014	NO_NFE2L2
	TCGA-99-7458	TCGA-99-7458-01A	TCGA-99-7458-01A-11R-2039-07	LUAD	female	9f0a9ce9-6258-4a82-84c1-dc017a7eb760	129a4f1c-81ee-4ebb-8c97-0a60fcc114d6.rna_seq.augmented_star_gene_counts.tsv	4254157	734863b21c2394f695dd66446c1ff58b	NO_NFE2L2
	TCGA-99-8025	TCGA-99-8025-01A	TCGA-99-8025-01A-11R-2241-07	LUAD	female	515aa64c-316b-497e-b877-7ab0c89a58bd	36f81494-52c4-49db-9dba-26a0c2de2e8e.rna_seq.augmented_star_gene_counts.tsv	4252294	3e6860b24df016fc9c652bfffa8cebed	NO_NFE2L2
	TCGA-99-8028	TCGA-99-8028-01A	TCGA-99-8028-01A-11R-2241-07	LUAD	female	490ee22a-f171-4f7f-9d49-835afe7388c1	5241ced4-4a72-40dc-9698-a647fb6d03a4.rna_seq.augmented_star_gene_counts.tsv	4243977	d8ed276fbb9f4e5a0dc8f22de2db5dbd	NO_NFE2L2
	TCGA-99-8032	TCGA-99-8032-01A	TCGA-99-8032-01A-11R-2241-07	LUAD	male	e98c7df6-1a65-41a0-9182-c752c89eafc7	01ebdef8-920f-4b71-8b44-512598962d6b.rna_seq.augmented_star_gene_counts.tsv	4252280	ce69c10f5a07fcfa46a19656605b17e4	NO_NFE2L2
	TCGA-99-8033	TCGA-99-8033-01A	TCGA-99-8033-01A-11R-2241-07	LUAD	female	22cae278-eb88-4685-9ff7-667e53b50a34	e0dabde8-1dd8-4aa6-9f23-51dc22fc2cae.rna_seq.augmented_star_gene_counts.tsv	4257692	27dc15ea77c9cb87d973c3011e549d6b	KEAP1
	TCGA-99-AA5R	TCGA-99-AA5R-01A	TCGA-99-AA5R-01A-11R-A39D-07	LUAD	female	30e51b69-6778-4125-bb18-86694d42a6e9	8bd7c2cf-7960-46ca-9373-1c19557dd0aa.rna_seq.augmented_star_gene_counts.tsv	4241149	f342cff10b7d2c71e57a90c5a91855f9	NO_NFE2L2
	TCGA-J2-8192	TCGA-J2-8192-01A	TCGA-J2-8192-01A-11R-2241-07	LUAD	female	19bb0296-340e-4594-9a87-4134b15c7187	12da2172-3304-4dad-bd80-3039e6d49de3.rna_seq.augmented_star_gene_counts.tsv	4265371	dce3133c7cd7dfbc744622005b96324f	NO_NFE2L2
	TCGA-J2-8194	TCGA-J2-8194-01A	TCGA-J2-8194-01A-11R-2241-07	LUAD	female	d88c062b-3c19-46e9-92b8-b80f6c3eef56	9a0910ce-634b-47b6-a63c-caaf219e0b55.rna_seq.augmented_star_gene_counts.tsv	4252336	1100a2729e7a82b2a5ac0c82da206ff0	KEAP1
	TCGA-J2-A4AD	TCGA-J2-A4AD-01A	TCGA-J2-A4AD-01A-11R-A24H-07	LUAD	female	911a72ec-dcb3-4454-8f22-7bd4f9d29b21	fe69fb9c-7215-478c-ae5c-44f5d0814b9d.rna_seq.augmented_star_gene_counts.tsv	4252007	03677dc93024ec2bbfb2318d7566c327	NO_NFE2L2
	TCGA-J2-A4AE	TCGA-J2-A4AE-01A	TCGA-J2-A4AE-01A-21R-A24H-07	LUAD	female	f2dbb2df-c98b-42d1-9fad-9708bc42fa03	b5cadc0c-3088-4f81-9561-902c8ca44c2d.rna_seq.augmented_star_gene_counts.tsv	4239412	f81aad9162561e324ef51a7a01317a4e	NO_NFE2L2
	TCGA-J2-A4AG	TCGA-J2-A4AG-01A	TCGA-J2-A4AG-01A-11R-A24H-07	LUAD	female	bd820f5e-c8fd-4af5-b81c-2c51715cd759	12beb3ab-f6e1-42b0-af74-1a8cbb3416c0.rna_seq.augmented_star_gene_counts.tsv	4234562	30ae0fb3e98b58ff708905810f4ee66d	NO_NFE2L2
	TCGA-L4-A4E5	TCGA-L4-A4E5-01A	TCGA-L4-A4E5-01A-11R-A24X-07	LUAD	female	de26de4a-c738-4a8b-a44a-0eab208c0db2	fb3e2838-b073-40c9-824f-3216f940a2c5.rna_seq.augmented_star_gene_counts.tsv	4241952	aa4c3f2f7f71e48e66bcb156dbb98a3b	NO_NFE2L2
	TCGA-L4-A4E6	TCGA-L4-A4E6-01A	TCGA-L4-A4E6-01A-11R-A24H-07	LUAD	male	7bc6d1c2-7d78-4b67-9c0d-8a836047f721	e4fe566f-bf64-408e-a422-fef7b855391f.rna_seq.augmented_star_gene_counts.tsv	4236145	8fa4504d7eefffe6f9fc7100a0b79b2f	NO_NFE2L2
	TCGA-L9-A443	TCGA-L9-A443-01A	TCGA-L9-A443-01A-12R-A24H-07	LUAD	female	9796354a-6ac6-466b-a82b-f1e9785bc447	da52147d-9bd6-449c-b5d9-b168822ddac0.rna_seq.augmented_star_gene_counts.tsv	4240230	9c97fb05beac363ba2a074331bca83b5	NO_NFE2L2
	TCGA-L9-A444	TCGA-L9-A444-01A	TCGA-L9-A444-01A-21R-A24H-07	LUAD	female	9bd26335-dd71-4821-b7d1-a4e24430fbb3	841e54a1-9d65-4256-b70e-eb64659b40a4.rna_seq.augmented_star_gene_counts.tsv	4229983	7317608cc1ef3790db80ce5e07d4ca91	NO_NFE2L2
	TCGA-L9-A50W	TCGA-L9-A50W-01A	TCGA-L9-A50W-01A-12R-A39D-07	LUAD	male	0765d9e8-0fec-46bc-832a-89945435d5b1	78bf9571-4145-4c0d-a61a-58a878351097.rna_seq.augmented_star_gene_counts.tsv	4248637	df8220816bbf3db26d528638d2f289fd	NO_NFE2L2
	TCGA-L9-A5IP	TCGA-L9-A5IP-01A	TCGA-L9-A5IP-01A-21R-A39D-07	LUAD	female	04778fc1-a821-4029-a383-d88e711f3bee	22cd91fc-54c5-43e0-80ff-19a419298721.rna_seq.augmented_star_gene_counts.tsv	4238174	73ae4d4d401efbe058d3bd47d3d22e47	NO_NFE2L2
	TCGA-L9-A743	TCGA-L9-A743-01A	TCGA-L9-A743-01A-43R-A39D-07	LUAD	male	51847dea-489f-4df9-84f8-26a6f2579620	35a9d225-0988-4e31-9a39-d54f3a63bea8.rna_seq.augmented_star_gene_counts.tsv	4245328	53810a51254a1fa3ae413dc7f75c5e9a	NO_NFE2L2
	TCGA-L9-A7SV	TCGA-L9-A7SV-01A	TCGA-L9-A7SV-01A-11R-A39D-07	LUAD	male	a9e3a464-50ea-49a0-9482-1513ed167bf4	6804af50-1b4f-4872-83b8-bae24d398cb4.rna_seq.augmented_star_gene_counts.tsv	4251798	f0bb3bbc9da88c260eb3355dc9e69d29	NO_NFE2L2
	TCGA-L9-A8F4	TCGA-L9-A8F4-01A	TCGA-L9-A8F4-01A-11R-A39D-07	LUAD	female	8be16a1a-383f-4365-b1e5-139b1625e3ce	e1b67311-dee7-4296-ac38-1ad47a80c257.rna_seq.augmented_star_gene_counts.tsv	4250770	1ea58f43e8e349787ddd20f98d29f7df	NO_NFE2L2
	TCGA-MN-A4N1	TCGA-MN-A4N1-01A	TCGA-MN-A4N1-01A-11R-A24X-07	LUAD	male	5ef157e9-bb3d-4214-a946-f5bc2bbf74b6	6078603d-a4e2-4a1a-abca-01fb63106888.rna_seq.augmented_star_gene_counts.tsv	4243528	b7a089eaaae9f690fd24e0648cc96c56	NO_NFE2L2
	TCGA-MN-A4N4	TCGA-MN-A4N4-01A	TCGA-MN-A4N4-01A-12R-A24X-07	LUAD	male	7abd9747-a947-4b15-b51c-c82cda9f065c	731c955b-e1e8-462a-9c94-64310f2d7eae.rna_seq.augmented_star_gene_counts.tsv	4244173	1622584397c678c7e0361519fdaec87b	NO_NFE2L2
	TCGA-MN-A4N5	TCGA-MN-A4N5-01A	TCGA-MN-A4N5-01A-11R-A24X-07	LUAD	male	b6a0d742-e7bc-4d67-8014-675e62f1ddd0	df3e51ff-63ad-45c2-ba71-676c5eb6b9e0.rna_seq.augmented_star_gene_counts.tsv	4251429	69dbc0c2623194f3587913c64661a3b0	CUL3
	TCGA-MP-A4SV	TCGA-MP-A4SV-01A	TCGA-MP-A4SV-01A-11R-A24X-07	LUAD	male	968c4aa2-2bcd-4823-b7fa-fbedc41ddb25	d7339ba2-0cc2-40b7-9dbe-f8f3366b20d9.rna_seq.augmented_star_gene_counts.tsv	4249826	6e228114d239ac381ef7ca831144a869	NO_NFE2L2
	TCGA-MP-A4SW	TCGA-MP-A4SW-01A	TCGA-MP-A4SW-01A-21R-A24X-07	LUAD	male	555bdfe8-80bb-46db-80f1-421038f5c2b4	25ef25f6-9982-41ad-9823-62763c6c29eb.rna_seq.augmented_star_gene_counts.tsv	4246061	4c5be09c86f910c1e3ea08a5f24621e1	NO_NFE2L2
	TCGA-MP-A4SY	TCGA-MP-A4SY-01A	TCGA-MP-A4SY-01A-21R-A24X-07	LUAD	male	6b6751a5-2dad-4bb4-bfae-b2239770fad8	41fde338-9254-4ad2-9806-d7864c2d038e.rna_seq.augmented_star_gene_counts.tsv	4246540	400c739136c9fea94e49d6d7b05bdeb0	NO_NFE2L2
	TCGA-MP-A4T4	TCGA-MP-A4T4-01A	TCGA-MP-A4T4-01A-11R-A262-07	LUAD	female	0344d3bb-8bb2-459e-bc1f-ba31c7470d08	39807893-979e-44c6-ada9-444c68b863c3.rna_seq.augmented_star_gene_counts.tsv	4241361	813876c8339211b5f2dbd9bfa5ede767	NO_NFE2L2
	TCGA-MP-A4T6	TCGA-MP-A4T6-01A	TCGA-MP-A4T6-01A-32R-A262-07	LUAD	female	48d5fe32-37ca-4717-af64-1343a3561849	04ce9fac-b5f3-4830-935e-9d6ea74ee915.rna_seq.augmented_star_gene_counts.tsv	4257770	f414598e7397e797f9126497ee198b53	NO_NFE2L2
	TCGA-MP-A4T7	TCGA-MP-A4T7-01A	TCGA-MP-A4T7-01A-11R-A24X-07	LUAD	female	d54e9279-578f-40cd-8e55-fbd7af5279dd	1c66cca9-ad78-44e5-ab54-be31d4a66437.rna_seq.augmented_star_gene_counts.tsv	4241776	7c7b923f271c379bfa9cab88431232f4	KEAP1
	TCGA-MP-A4T8	TCGA-MP-A4T8-01A	TCGA-MP-A4T8-01A-11R-A24X-07	LUAD	male	c343f781-c1df-4349-aab3-f159329a11da	3a8b14d9-c521-48d4-9400-074d752afe1b.rna_seq.augmented_star_gene_counts.tsv	4240611	1b67c1145e085900d7878227a2aa6cec	NO_NFE2L2
	TCGA-MP-A4T9	TCGA-MP-A4T9-01A	TCGA-MP-A4T9-01A-11R-A24X-07	LUAD	female	8ddad1cb-d2ab-4fbf-865e-f134fcce0194	3c6fdcc9-916b-4ec2-be58-1dd15e7d94a2.rna_seq.augmented_star_gene_counts.tsv	4248549	c45bc11b5e9c813d6bf503bfe169abb5	NO_NFE2L2
	TCGA-MP-A4TA	TCGA-MP-A4TA-01A	TCGA-MP-A4TA-01A-21R-A24X-07	LUAD	female	692a5c89-8f1a-4e23-a490-b092c6bb37c5	64a2d5cb-2892-4d2a-aa7a-cc1a6dec1c46.rna_seq.augmented_star_gene_counts.tsv	4251917	44a3b36c64045a88bed0b6f746dd4e2a	NO_NFE2L2
	TCGA-MP-A4TC	TCGA-MP-A4TC-01A	TCGA-MP-A4TC-01A-11R-A24X-07	LUAD	male	2fa40914-d149-4f67-aa78-64723258314f	e0819bee-5642-4297-b6bb-70e41d54ee8c.rna_seq.augmented_star_gene_counts.tsv	4238974	1e1db517b57d7edb72b56e62f6522d52	NO_NFE2L2
	TCGA-MP-A4TD	TCGA-MP-A4TD-01A	TCGA-MP-A4TD-01A-32R-A262-07	LUAD	male	df452e00-a7e9-4045-83fb-623885a542d4	5444c7d2-9c7e-4b9e-a8ee-7d64c375be17.rna_seq.augmented_star_gene_counts.tsv	4242302	4af0fb0fff41735de9f66e7aef844b2b	NO_NFE2L2
	TCGA-MP-A4TE	TCGA-MP-A4TE-01A	TCGA-MP-A4TE-01A-22R-A466-07	LUAD	male	d8334fd5-d042-48b4-95f5-4d5e3c5166e9	aab7b2a0-4181-4556-b1a8-28d31f98a43c.rna_seq.augmented_star_gene_counts.tsv	4234672	334ed0d69b61a0328fbfe91d87deeebe	KEAP1
	TCGA-MP-A4TF	TCGA-MP-A4TF-01A	TCGA-MP-A4TF-01A-11R-A262-07	LUAD	female	ed3bcbbc-0f04-415f-a083-e34cefa9e310	828b6221-7b05-4e5f-aee0-0234f06fb81e.rna_seq.augmented_star_gene_counts.tsv	4230231	0dfc9ad71e9fbd6ce50ec0c37da15770	NO_NFE2L2
	TCGA-MP-A4TH	TCGA-MP-A4TH-01A	TCGA-MP-A4TH-01A-31R-A262-07	LUAD	female	9ee64463-e09f-4983-b83d-a6a5481cab9a	681308e4-1122-4343-9d6b-63df6a39d302.rna_seq.augmented_star_gene_counts.tsv	4241969	1d8b1e8e20fc34de64dead5341e1408a	NO_NFE2L2
	TCGA-MP-A4TI	TCGA-MP-A4TI-01A	TCGA-MP-A4TI-01A-21R-A24X-07	LUAD	male	775f63d2-d752-4d68-abc1-129fce5c3301	6aa56177-0576-454d-81e8-28aa9ce76406.rna_seq.augmented_star_gene_counts.tsv	4238700	cd814ca615d8b2be63df5c14b4ab0131	NO_NFE2L2
	TCGA-MP-A4TJ	TCGA-MP-A4TJ-01A	TCGA-MP-A4TJ-01A-51R-A262-07	LUAD	female	fc757476-1d31-470b-b648-79608b201bdc	156a175b-b419-4089-8541-7318e3dee78a.rna_seq.augmented_star_gene_counts.tsv	4233530	fd4dab831f28f3a89edfa334c3a89fd9	NO_NFE2L2
	TCGA-MP-A4TK	TCGA-MP-A4TK-01A	TCGA-MP-A4TK-01A-11R-A24X-07	LUAD	female	7a59e84b-2d4a-4148-966d-7eadeb61ef38	9fde5e1d-5b86-411d-b194-3eb3c6305ebd.rna_seq.augmented_star_gene_counts.tsv	4242753	9c21043c5638dba7273a01f2c1e1173c	NO_NFE2L2
	TCGA-MP-A5C7	TCGA-MP-A5C7-01A	TCGA-MP-A5C7-01A-11R-A262-07	LUAD	female	648b0d02-f264-4d88-9997-baed8f000a60	6c438dcf-6ec0-4bf7-8122-875490967b70.rna_seq.augmented_star_gene_counts.tsv	4249970	96663d7e70cf35a9fe1e370d6c34e806	KEAP1
	TCGA-NJ-A4YF	TCGA-NJ-A4YF-01A	TCGA-NJ-A4YF-01A-12R-A262-07	LUAD	female	46a5c6c0-f460-4036-b3e6-eea9ec82ea14	3a284d39-2913-4d8c-b46a-9b1e991cfd0b.rna_seq.augmented_star_gene_counts.tsv	4224811	622335c3672071db92e2df622e1a80f9	NO_NFE2L2
	TCGA-NJ-A4YG	TCGA-NJ-A4YG-01A	TCGA-NJ-A4YG-01A-22R-A262-07	LUAD	male	3973bbdc-bc07-4deb-955b-3c40e88a68be	c6b74844-5140-4c2e-b13d-fc50c2f2e9f1.rna_seq.augmented_star_gene_counts.tsv	4232275	70533535287e42cfa51abf1138826d6e	NO_NFE2L2
	TCGA-NJ-A4YI	TCGA-NJ-A4YI-01A	TCGA-NJ-A4YI-01A-11R-A262-07	LUAD	female	0b73f593-b6e8-4897-9b9b-f09e65e436b7	30a6ea89-8eda-47cf-b336-e070fcd08740.rna_seq.augmented_star_gene_counts.tsv	4230744	9717e87c21db6d45d57d5a02aa5b6b2e	NO_NFE2L2
	TCGA-NJ-A4YP	TCGA-NJ-A4YP-01A	TCGA-NJ-A4YP-01A-11R-A262-07	LUAD	male	e3339500-9481-4a24-a3b8-65b86dabc920	57048ebe-3153-4e65-bbca-eadb92b99d31.rna_seq.augmented_star_gene_counts.tsv	4268655	4293c0b92c8ba7ee14e077b33540b934	CUL3
	TCGA-NJ-A4YQ	TCGA-NJ-A4YQ-01A	TCGA-NJ-A4YQ-01A-11R-A262-07	LUAD	female	140633c2-a8e9-4a2d-a044-082cd099ff98	b7f29b8c-08a8-4781-ba33-5a7b6b02ad23.rna_seq.augmented_star_gene_counts.tsv	4232632	62ab2e7a471de153bbf4530d13914cd6	KEAP1
	TCGA-NJ-A55A	TCGA-NJ-A55A-01A	TCGA-NJ-A55A-01A-11R-A262-07	LUAD	female	5eefc0d2-90b4-495f-803b-cfe9f158b980	67fc0674-3f48-41ec-a650-7efaa41607fa.rna_seq.augmented_star_gene_counts.tsv	4229541	c2b438d62a23a3f2a438d3d2306977f1	NO_NFE2L2
	TCGA-NJ-A55O	TCGA-NJ-A55O-01A	TCGA-NJ-A55O-01A-11R-A262-07	LUAD	female	b0a1b626-c44b-4a95-b4a4-383fc63f8649	233b6aa7-9d3f-4db0-a900-03f7cf4d0ac4.rna_seq.augmented_star_gene_counts.tsv	4231740	b7c92987759a21776856c723f9351d36	NO_NFE2L2
	TCGA-NJ-A55R	TCGA-NJ-A55R-01A	TCGA-NJ-A55R-01A-11R-A262-07	LUAD	male	db5e9553-ca85-4dcd-9229-2ac1ba208d52	57ae0185-984b-40a7-8d95-1a6a2cc0b03a.rna_seq.augmented_star_gene_counts.tsv	4278768	332a271e217e8309eb33d5f6a7774f29	KEAP1
	TCGA-NJ-A7XG	TCGA-NJ-A7XG-01A	TCGA-NJ-A7XG-01A-12R-A39D-07	LUAD	male	3c421a7f-8bde-4b4b-90e5-cf0ea11274ab	fbd81adc-aa56-4cde-b1f2-e749e2cbf653.rna_seq.augmented_star_gene_counts.tsv	4237424	9ea84591cfd8c515b09154818d1f2d2d	NO_NFE2L2
	TCGA-O1-A52J	TCGA-O1-A52J-01A	TCGA-O1-A52J-01A-11R-A262-07	LUAD	female	7a176670-7636-4329-951b-c118b816cfca	9ce317be-70dc-4dd2-86b5-e6f79be6f10b.rna_seq.augmented_star_gene_counts.tsv	4241397	b67abf0b1d828c1958c03adcec5584fc	NO_NFE2L2
	TCGA-S2-AA1A	TCGA-S2-AA1A-01A	TCGA-S2-AA1A-01A-12R-A39D-07	LUAD	female	deb2d529-5ea7-4a41-be07-f9239d7ac759	5d081953-cf3a-40cb-95bf-f418ed3879ac.rna_seq.augmented_star_gene_counts.tsv	4234104	f51db06a247a24205c23debe748cf6e8	NO_NFE2L2
	TCGA-18-3406	TCGA-18-3406-01A	TCGA-18-3406-01A-01R-0980-07	LUSC	male	d3b06d38-0bf2-4982-9728-8eb33e27b756	22f0a151-79e5-4f20-8301-412961bd8216.rna_seq.augmented_star_gene_counts.tsv	4222809	08c425aef033bd51d391c7b3ce7b78cd	NO_NFE2L2
	TCGA-18-3407	TCGA-18-3407-01A	TCGA-18-3407-01A-01R-0980-07	LUSC	male	393a1776-5f0b-4411-8266-5687be14dbfc	90e56bb7-5403-42c9-b5c2-aad34578cc82.rna_seq.augmented_star_gene_counts.tsv	4238237	fd95818835f8b091371e06b5e7bd617a	KEAP1
	TCGA-18-3408	TCGA-18-3408-01A	TCGA-18-3408-01A-01R-0980-07	LUSC	female	badfeadb-409d-46e6-8070-94790893ae4c	0f192f97-b674-4c9f-be3e-aa4bfdc4e91b.rna_seq.augmented_star_gene_counts.tsv	4226621	26bcf000e9f68c6f50de5c84afa19876	NO_NFE2L2
X	TCGA-18-3409	TCGA-18-3409-01A	TCGA-18-3409-01A-01R-0980-07	LUSC	male	d6a0842c-cfda-4abe-9197-d1dba14ec313	81f9213e-6abf-4a0e-9dac-103c76294772.rna_seq.augmented_star_gene_counts.tsv	4238213	651e079dcd911a7f7b1bfa9e9be01cc6		No mutation data
	TCGA-18-3410	TCGA-18-3410-01A	TCGA-18-3410-01A-01R-0980-07	LUSC	male	5d703777-b3db-4ed5-952b-203a5641767e	1138323c-5a60-4535-bfb3-31703a106798.rna_seq.augmented_star_gene_counts.tsv	4252191	da170b83ac55c70b9ee7a4507fb94b1a	NO_NFE2L2
	TCGA-18-3411	TCGA-18-3411-01A	TCGA-18-3411-01A-01R-0980-07	LUSC	female	1ce39b8e-6053-4e64-aae1-f857e1b029d1	ed41fe8b-fe2e-4bf3-91e3-2cf50ddcbc78.rna_seq.augmented_star_gene_counts.tsv	4240154	a37c500ce5f7f572d5ba8f9129ec71e6	NO_NFE2L2
	TCGA-18-3412	TCGA-18-3412-01A	TCGA-18-3412-01A-01R-0980-07	LUSC	male	bf456ccc-e7bb-40e0-9e92-03e6ced8564b	bad4a9f0-f6cf-4dd7-927d-4bfa9df0401e.rna_seq.augmented_star_gene_counts.tsv	4243182	40b837a77deb5da0b511532bade7c04c	NO_NFE2L2
	TCGA-18-3414	TCGA-18-3414-01A	TCGA-18-3414-01A-01R-0980-07	LUSC	male	86ce663f-9823-4582-8ed9-898cae3edf9f	adac63c6-4b21-41bd-8388-bff13231d2b1.rna_seq.augmented_star_gene_counts.tsv	4252898	5aafd68f8b8fb4be326582c53e61539e	NO_NFE2L2
	TCGA-18-3415	TCGA-18-3415-01A	TCGA-18-3415-01A-01R-0980-07	LUSC	male	6cfe7a85-006a-4eec-88bf-c80bfdfc45f5	fad27069-6285-4999-9de7-5a579c2c78e4.rna_seq.augmented_star_gene_counts.tsv	4227954	5bf5614e108de0558aec8871c46e601d	NFE2L2
	TCGA-18-3416	TCGA-18-3416-01A	TCGA-18-3416-01A-01R-0980-07	LUSC	male	62c0d1a5-7c0a-412a-bf02-af9240195b90	0403c63c-8013-474c-a885-3830dbac4187.rna_seq.augmented_star_gene_counts.tsv	4234076	d6fccbffff296e80b2ea6c279c55892f	NO_NFE2L2
	TCGA-18-3417	TCGA-18-3417-01A	TCGA-18-3417-01A-01R-1443-07	LUSC	male	7b27b23a-d94c-4a9e-bf22-d8209a4bc6ef	b949ed76-60a2-4a59-b14f-0d215e69b71b.rna_seq.augmented_star_gene_counts.tsv	4203218	c04bd756c82c4766f98087ace39716ee	NO_NFE2L2
	TCGA-18-3419	TCGA-18-3419-01A	TCGA-18-3419-01A-01R-0980-07	LUSC	male	aa3501a9-217b-4d3a-8dab-0fb359728726	b039b20f-5532-41b4-a92e-b48bc87f89c1.rna_seq.augmented_star_gene_counts.tsv	4232869	25711cea52eaa6f7dd3a782946f602b8	NO_NFE2L2
	TCGA-18-3421	TCGA-18-3421-01A	TCGA-18-3421-01A-01R-0980-07	LUSC	male	e9b58b5f-9246-4bf1-b921-1da50b471ceb	dd29f468-7d53-4557-8c22-d4368f5004f7.rna_seq.augmented_star_gene_counts.tsv	4227744	74d4b9c679213881a81a7180f05c88a4	NO_NFE2L2
	TCGA-18-4083	TCGA-18-4083-01A	TCGA-18-4083-01A-01R-1100-07	LUSC	male	a4b51d89-f5bf-44c1-9822-9bd033709681	60438408-6d49-446f-a182-57732b78c6d8.rna_seq.augmented_star_gene_counts.tsv	4254197	3be38dfda35b9d3239db9d3e7c82c1ae	NO_NFE2L2
	TCGA-18-4086	TCGA-18-4086-01A	TCGA-18-4086-01A-01R-1100-07	LUSC	male	2e4e9e9d-5d02-4fa1-95a4-774f7c963652	b30a2d76-0fbd-4ef6-9358-ecff487a453e.rna_seq.augmented_star_gene_counts.tsv	4244061	476007945b82225ec1158e92192749cf	NO_NFE2L2
	TCGA-18-4721	TCGA-18-4721-01A	TCGA-18-4721-01A-01R-1443-07	LUSC	male	df84be80-ef6b-4417-a58c-fdfd2e031850	60b7b532-ebdd-403f-9f60-e54c7fc9669f.rna_seq.augmented_star_gene_counts.tsv	4212563	3c3f0834bf9641660bb501419f4b5c92	CUL3
	TCGA-18-5592	TCGA-18-5592-01A	TCGA-18-5592-01A-01R-1635-07	LUSC	male	cded92df-9367-4ee5-930c-6c87bf2c8eb0	a07f82d9-44a6-41ac-97bb-52a14ba37f34.rna_seq.augmented_star_gene_counts.tsv	4240234	7108659a61a5e0cf1aa7abb4dbcdb409	CUL3
X	TCGA-18-5595	TCGA-18-5595-01A	TCGA-18-5595-01A-01R-1635-07	LUSC	male	c57d8af8-d433-4df9-ba01-455496f8f867	d5d316ad-173b-40bf-b91c-2e38393fed85.rna_seq.augmented_star_gene_counts.tsv	4247085	e512104d9632bf46cc6f529a9563730f		No mutation data
X	TCGA-21-1070	TCGA-21-1070-01A	TCGA-21-1070-01A-01R-0692-07	LUSC	female	0f3755ec-9e0e-4fc9-ae14-a32d6b486a7e	b1361753-6f8c-4038-addb-9e4767ca627c.rna_seq.augmented_star_gene_counts.tsv	4239901	47d910fa8216b6cbc796425707cca061		No mutation data
	TCGA-21-1071	TCGA-21-1071-01A	TCGA-21-1071-01A-01R-0692-07	LUSC	male	9a535718-1719-4f78-a2fd-8cacd335efe8	d2de525f-e7d6-41d8-9706-f1746c9706d4.rna_seq.augmented_star_gene_counts.tsv	4242860	06071aa6c3b78b35090ea96650f269eb	NFE2L2
	TCGA-21-1072	TCGA-21-1072-01A	TCGA-21-1072-01A-01R-0692-07	LUSC	male	95f2d1a0-0e60-43f6-85c2-359c1436aa20	0f6f7201-0e1c-4243-9911-7f34eb70cc45.rna_seq.augmented_star_gene_counts.tsv	4244693	3f0f426d34d99441103ba61a9f89d4b8	NO_NFE2L2
	TCGA-21-1075	TCGA-21-1075-01A	TCGA-21-1075-01A-01R-0692-07	LUSC	male	5cdfbd13-9630-48a5-9f3e-6b17658e877a	1f4829fb-ebb8-4ff3-9c44-dd503258c54d.rna_seq.augmented_star_gene_counts.tsv	4240447	fcf576cd7a49a8bec5c9ec2db5dba177	NFE2L2
X	TCGA-21-1076	TCGA-21-1076-01A	TCGA-21-1076-01A-01R-0692-07	LUSC	female	9aa3bf8f-8422-4c86-8809-b82d7117c3a2	cf847ade-6000-4bc2-9f94-446e6b4da0b4.rna_seq.augmented_star_gene_counts.tsv	4255230	42b53c018ec006696e8a6d2b96e85ee4		Duplicated analysis with later subject aliquot
	TCGA-21-1076	TCGA-21-1076-01A	TCGA-21-1076-01A-02R-0692-07	LUSC	female	50cca459-fde7-4cd3-a21c-5b60bdb3403b	ed1880f0-e9f7-43ce-8a52-1398556e7c22.rna_seq.augmented_star_gene_counts.tsv	4254732	7c88a4e1b2ca7d4f59437016b63c80af	NO_NFE2L2
X	TCGA-21-1077	TCGA-21-1077-01A	TCGA-21-1077-01A-01R-0692-07	LUSC	male	125a1d73-c62c-4776-85ae-bc50871f22bf	fd804c92-b610-4fe4-8df2-1a272fb34052.rna_seq.augmented_star_gene_counts.tsv	4249047	6ef66053549ad057cf998e2b63c53213		No mutation data
X	TCGA-21-1078	TCGA-21-1078-01A	TCGA-21-1078-01A-01R-0692-07	LUSC	male	3a3ef9b4-f31e-4bcf-ab1e-c2ae5c86e315	011ccd6c-529a-4529-825d-ba024c13098d.rna_seq.augmented_star_gene_counts.tsv	4236037	903e12c0e6e8e45026040b2b55d17dc4		No mutation data
	TCGA-21-1079	TCGA-21-1079-01A	TCGA-21-1079-01A-01R-0692-07	LUSC	male	e440451a-d436-4933-885b-3951e0767b42	53d0ee2e-7214-4180-8688-95009289cfdf.rna_seq.augmented_star_gene_counts.tsv	4235479	4af143f3e4c4a4618dbcdb11702c52df	NO_NFE2L2
	TCGA-21-1080	TCGA-21-1080-01A	TCGA-21-1080-01A-01R-0692-07	LUSC	male	04fae5f3-cc86-48aa-a935-77195c1fa8bc	1af97fe9-0db6-4a52-86cb-e6b73a42bcd3.rna_seq.augmented_star_gene_counts.tsv	4241621	b303725b41496cf709b5aea9a622034e	NO_NFE2L2
	TCGA-21-1081	TCGA-21-1081-01A	TCGA-21-1081-01A-01R-0692-07	LUSC	male	e789877b-6eb5-434c-85b8-a62a99937b98	cd043a38-03e2-4278-8396-c5654e056664.rna_seq.augmented_star_gene_counts.tsv	4260398	9d538268a704b60ba1221daef40cfb25	NO_NFE2L2
	TCGA-21-1082	TCGA-21-1082-01A	TCGA-21-1082-01A-01R-0692-07	LUSC	male	fe79c09e-f0ac-4166-b789-33fa1d2fb9d0	915f6c40-fe7f-42ee-ac0d-a82a87c1d9cd.rna_seq.augmented_star_gene_counts.tsv	4254485	b6a2748eddda493afef6ac29d1a6dfae	NO_NFE2L2
X	TCGA-21-1083	TCGA-21-1083-01A	TCGA-21-1083-01A-01R-0692-07	LUSC	male	d30182cd-80ad-4912-9404-20411c5253ea	143ed468-a30e-4ddb-9cb8-f9d9f9b8fcba.rna_seq.augmented_star_gene_counts.tsv	4258239	725cc38e302ab644ddb300638e2f26ff		No mutation data
	TCGA-21-5782	TCGA-21-5782-01A	TCGA-21-5782-01A-01R-1635-07	LUSC	female	ba47cbb5-556b-490b-af63-a5005ee42f11	2bfa31db-ff7b-4ba0-8412-c5b9c517e3c1.rna_seq.augmented_star_gene_counts.tsv	4252264	54bc6e8c8c95100201b7c8845a4f39da	NO_NFE2L2
	TCGA-21-5783	TCGA-21-5783-01A	TCGA-21-5783-01A-41R-2187-07	LUSC	male	ef787e48-48bb-4b33-91d6-1fb9302bab0a	67980247-ec2a-4804-b4d1-ed752c40577a.rna_seq.augmented_star_gene_counts.tsv	4259482	0ed04674242a2bf1c2fa6c1157f31470	NO_NFE2L2
	TCGA-21-5784	TCGA-21-5784-01A	TCGA-21-5784-01A-01R-1635-07	LUSC	female	8263ab47-6cd7-4460-a692-982a88a12ada	3ba0ce62-8e26-4a76-b1b2-117e9004662f.rna_seq.augmented_star_gene_counts.tsv	4239801	697ab2a7ea8cc987183cc9d7bc6aa5de	NO_NFE2L2
	TCGA-21-5786	TCGA-21-5786-01A	TCGA-21-5786-01A-01R-1635-07	LUSC	male	16868c31-baad-4796-a5ca-c65c902580af	edac7609-df82-4451-9ef3-ec30791fb45d.rna_seq.augmented_star_gene_counts.tsv	4247991	406fcc888a46d8809b8798ccc3cb31d5	NO_NFE2L2
	TCGA-21-5787	TCGA-21-5787-01A	TCGA-21-5787-01A-01R-1635-07	LUSC	male	132bc0ae-2498-4a65-bcb9-1970b70b0df5	7dd3ae00-47e1-4214-a3cc-9f3e00321f11.rna_seq.augmented_star_gene_counts.tsv	4238581	ed90d9083dfa6741ca069d0803b40d9d	NO_NFE2L2
X	TCGA-21-A5DI	TCGA-21-A5DI-01A	TCGA-21-A5DI-01A-31R-A26W-07	LUSC	male	da8679e6-96fc-4874-83c8-a3e3b0fe20d4	9b86812f-b1ee-4b6d-9691-8587f2487c4a.rna_seq.augmented_star_gene_counts.tsv	4223293	c9b3862c3032bfe4eba1fc1161bd05d8		No mutation data
	TCGA-22-0940	TCGA-22-0940-01A	TCGA-22-0940-01A-01R-0692-07	LUSC	male	771fb64d-317e-4eeb-8945-b3446848294a	cb7f1dab-ee8b-4f22-b704-0e868b3a14b5.rna_seq.augmented_star_gene_counts.tsv	4245925	875e696dc2405c39034ce29a29bd28d1	NO_NFE2L2
	TCGA-22-0944	TCGA-22-0944-01A	TCGA-22-0944-01A-01R-0692-07	LUSC	male	4e1add14-24f2-4ee0-aaf6-053116115a52	8473bc80-0ea5-4e1e-a761-46851d97e4ff.rna_seq.augmented_star_gene_counts.tsv	4245961	4709da5a4c4693e2a7f09d25613c4831	NO_NFE2L2
	TCGA-22-1000	TCGA-22-1000-01A	TCGA-22-1000-01A-01R-A32Z-07	LUSC	male	12c81c8b-9937-4b35-b374-0fd21d2481e6	18eaf36e-6272-44e8-9144-59d953e511c6.rna_seq.augmented_star_gene_counts.tsv	4244978	164b4b13b64d37e735b69236cad6a447	NO_NFE2L2
	TCGA-22-1002	TCGA-22-1002-01A	TCGA-22-1002-01A-01R-0692-07	LUSC	male	b584825e-de20-44cb-bb1f-40db9b98fb3e	4bb272cb-9d6f-45da-a0fd-9527cdab49c1.rna_seq.augmented_star_gene_counts.tsv	4246779	64954393e3e48ec0b120b61658fb7e6a	NO_NFE2L2
	TCGA-22-1005	TCGA-22-1005-01A	TCGA-22-1005-01A-01R-0692-07	LUSC	male	b6d66063-5c82-4be2-9355-1ba53abbb29b	7b582aa9-9564-4c04-9b68-a33f797056a7.rna_seq.augmented_star_gene_counts.tsv	4230428	a52867d5c8ff8ef8000232d1dc062db7	NO_NFE2L2
	TCGA-22-1011	TCGA-22-1011-01A	TCGA-22-1011-01A-01R-0692-07	LUSC	male	4833219b-b619-423e-b3f3-d6f2c6cbbf39	5f4e0d83-7aca-4096-a7a6-a2a2d58feaae.rna_seq.augmented_star_gene_counts.tsv	4240162	f17a77d3f099ec3099f8bb85c20c4d6d	NO_NFE2L2
	TCGA-22-1012	TCGA-22-1012-01A	TCGA-22-1012-01A-01R-0692-07	LUSC	female	e2445ad6-2a6a-4ec3-84d8-93cc3c180a58	498f8ac7-6645-45b1-8b58-d450c838eae2.rna_seq.augmented_star_gene_counts.tsv	4233437	df78b10686166e28b8e172b5a031df16	NO_NFE2L2
	TCGA-22-1016	TCGA-22-1016-01A	TCGA-22-1016-01A-01R-0692-07	LUSC	male	0889a6ea-a12a-4cc9-bec5-3103a3cdbba3	1fe2c91b-af3e-40f7-858d-9ed0faccbbe3.rna_seq.augmented_star_gene_counts.tsv	4254966	8729ec60d3fde5ef7b1ab94ca6767fb2	NO_NFE2L2
	TCGA-22-1017	TCGA-22-1017-01A	TCGA-22-1017-01A-01R-0692-07	LUSC	male	1cda41ee-8fba-45c4-b1ba-14f5844ace4a	6183a6eb-8d7f-44e9-8e59-5e74ddb7426c.rna_seq.augmented_star_gene_counts.tsv	4241382	31485324c80929b58cf536aa845c687c	NO_NFE2L2
	TCGA-22-4591	TCGA-22-4591-01A	TCGA-22-4591-01A-01R-1201-07	LUSC	male	c4dd4c4b-7ea5-4d78-811e-078e45a37b35	d3516b7f-5392-415c-930c-835974d888c7.rna_seq.augmented_star_gene_counts.tsv	4253221	e5236d6f8da4239c8e8397138c186f60	NO_NFE2L2
	TCGA-22-4593	TCGA-22-4593-01A	TCGA-22-4593-01A-21R-1820-07	LUSC	male	02cea26c-3987-41a8-b040-d6a72fc7a220	1ca4850a-5354-47ac-8f9b-a7b774c96217.rna_seq.augmented_star_gene_counts.tsv	4260661	1471bfe690fbdb4f0a702801a4ed2416	NO_NFE2L2
	TCGA-22-4594	TCGA-22-4594-01A	TCGA-22-4594-01A-01R-1201-07	LUSC	female	8ccc54f2-104f-4d3d-bf5a-b16b9e228110	9c7aa844-96f4-4906-9d7f-7c88a07d8dd6.rna_seq.augmented_star_gene_counts.tsv	4241505	5e1eb0da9483b8199fe48056e4c4c44c	KEAP1
	TCGA-22-4595	TCGA-22-4595-01A	TCGA-22-4595-01A-01R-1201-07	LUSC	male	6170ecbe-9ede-4afe-b020-655a903d96aa	6c2ccdf1-5dff-4e6e-8c2c-62a64cefcb6e.rna_seq.augmented_star_gene_counts.tsv	4252801	30dc188d4fef04b57ff5baa11842bd50	NO_NFE2L2
	TCGA-22-4596	TCGA-22-4596-01A	TCGA-22-4596-01A-01R-1201-07	LUSC	female	93288581-37b8-4e24-83ce-d1668ffe7a5f	5e3a14b3-b976-4d61-aef7-3f9ed88d11b2.rna_seq.augmented_star_gene_counts.tsv	4245666	ff89bf2ac7b02b99a376ae17d506a5ef	NO_NFE2L2
	TCGA-22-4599	TCGA-22-4599-01A	TCGA-22-4599-01A-01R-1443-07	LUSC	female	041ade4f-0a88-4b1d-8454-08a2bc3cb3c2	e9cd1886-24d4-4589-82b1-f87830f1d1c5.rna_seq.augmented_star_gene_counts.tsv	4210175	7f4d1f31d7b9a3850ad7db2ac9f5f6ec	KEAP1
	TCGA-22-4601	TCGA-22-4601-01A	TCGA-22-4601-01A-01R-1443-07	LUSC	female	9e5f8edc-5074-43b7-a870-594aeb36e2aa	a97ec363-e9c5-4c36-bb43-432e597433c9.rna_seq.augmented_star_gene_counts.tsv	4224910	b8f4cd44dc4f00711e167dd32a2c2e09	NO_NFE2L2
	TCGA-22-4604	TCGA-22-4604-01A	TCGA-22-4604-01A-01R-1201-07	LUSC	male	a81de654-64d9-4273-9bf1-d59cea7c4121	71e06ef6-152b-4801-bfed-4213c458a465.rna_seq.augmented_star_gene_counts.tsv	4256563	3c048a5eaaf0abed98c1ebde21cd8c92	NO_NFE2L2
	TCGA-22-4605	TCGA-22-4605-01A	TCGA-22-4605-01A-21R-2125-07	LUSC	female	97df56d6-9763-4560-a585-9538af164cfe	bcedce65-8859-4161-8d62-7f701112248d.rna_seq.augmented_star_gene_counts.tsv	4248151	16242894b86ab734363d08d027f75f08	NFE2L2
	TCGA-22-4607	TCGA-22-4607-01A	TCGA-22-4607-01A-01R-1201-07	LUSC	male	3aa53aa2-97cd-43a8-b7b1-09f0bf6381dd	db34e8d7-edf2-4fb2-a261-75cf0a84e506.rna_seq.augmented_star_gene_counts.tsv	4243581	9f40f1ccf891b64be94b4ac658d844fb	NO_NFE2L2
	TCGA-22-4609	TCGA-22-4609-01A	TCGA-22-4609-01A-21R-2125-07	LUSC	male	7d1231c0-6ff0-4ef0-98a3-3b77ed9298bc	eb23a0d5-3a04-4cc8-aca2-448e72a8360a.rna_seq.augmented_star_gene_counts.tsv	4251321	293e192c14df557abc3fb10b2ed7dcf4	NO_NFE2L2
	TCGA-22-4613	TCGA-22-4613-01A	TCGA-22-4613-01A-01R-1443-07	LUSC	female	fb5fc040-9f48-4eb6-89b3-9c0407222201	ca2b737e-2db0-4e74-baee-c0d40ff76382.rna_seq.augmented_star_gene_counts.tsv	4220722	fba6eaf44ea395b5fd68f1bb47f242b8	NO_NFE2L2
	TCGA-22-5471	TCGA-22-5471-01A	TCGA-22-5471-01A-01R-1635-07	LUSC	male	7a9de79e-7eaf-41f3-b7fd-bd59cbf64443	c3f12570-a4ac-4222-9cba-e768ad282eaa.rna_seq.augmented_star_gene_counts.tsv	4248176	f133b7babb2be5568b5c7d6e4b9b3e63	NO_NFE2L2
	TCGA-22-5472	TCGA-22-5472-01A	TCGA-22-5472-01A-01R-1635-07	LUSC	male	c10c6664-2b6f-4486-ae42-d754656c2538	3b9e1cd6-7b59-4a05-a896-9789b317741c.rna_seq.augmented_star_gene_counts.tsv	4249064	78a204ea38c6d3ece4de2705c42d646c	NO_NFE2L2
	TCGA-22-5473	TCGA-22-5473-01A	TCGA-22-5473-01A-01R-1635-07	LUSC	male	b34c57e4-8afb-4b20-8634-dd38e8e7828d	4523fea5-05af-4b00-bd5c-434916e561f3.rna_seq.augmented_star_gene_counts.tsv	4245595	29f0b2523a31c812a9049174ed974c0e	NO_NFE2L2
	TCGA-22-5474	TCGA-22-5474-01A	TCGA-22-5474-01A-01R-1635-07	LUSC	male	159c6763-6fc8-4ed6-b21d-7458b1289978	24ee17a9-b2e4-4058-a7b9-32d815f51cac.rna_seq.augmented_star_gene_counts.tsv	4256563	e57d3a41da0dc3090386d5029f50a6d3	NFE2L2
	TCGA-22-5477	TCGA-22-5477-01A	TCGA-22-5477-01A-01R-1635-07	LUSC	male	0d7c7ed6-8fc3-42c1-9669-297584b110c5	7437ff54-52c5-4ea7-87f2-d97c9a608657.rna_seq.augmented_star_gene_counts.tsv	4258549	8ab3d7c5e7b9ae5674f1689954e672b6	NO_NFE2L2
	TCGA-22-5478	TCGA-22-5478-01A	TCGA-22-5478-01A-01R-1635-07	LUSC	male	6896f254-0a80-40de-a674-02685d335151	b0a121e1-c084-43e0-89b6-0cf037d5aba1.rna_seq.augmented_star_gene_counts.tsv	4259860	48acb38c67af89dde51e4ce5aa613f3e	NO_NFE2L2
	TCGA-22-5479	TCGA-22-5479-01A	TCGA-22-5479-01A-31R-1949-07	LUSC	male	84bb43ac-afd4-4f2b-aeee-bdbe0d2e8d88	3ab1dfbc-ab83-446e-b680-cd6aec12b177.rna_seq.augmented_star_gene_counts.tsv	4239023	7db475af7efda6f40ef596b5daecdd68	NO_NFE2L2
	TCGA-22-5480	TCGA-22-5480-01A	TCGA-22-5480-01A-01R-1635-07	LUSC	female	9364cedf-16c0-4d5b-9ae9-2e5e3d3c8506	fc7a67a1-4af8-404c-a5fc-631ed33d0b45.rna_seq.augmented_star_gene_counts.tsv	4256739	25df93cb8c55fc74472997dfbcec61d4	NO_NFE2L2
	TCGA-22-5481	TCGA-22-5481-01A	TCGA-22-5481-01A-31R-1949-07	LUSC	female	7d639694-3492-4502-ba23-69655f31f7e6	0d3d4e7f-e9d6-4113-b21e-8811f8f53d55.rna_seq.augmented_star_gene_counts.tsv	4239861	e184f0a0ea124db1fa1edee45bdcbbd5	NO_NFE2L2
	TCGA-22-5482	TCGA-22-5482-01A	TCGA-22-5482-01A-01R-1635-07	LUSC	male	342ae6d9-d9b9-4458-8c39-19faf0c7aeac	ac006ae3-d1c7-47fd-950a-6eee9f72ad66.rna_seq.augmented_star_gene_counts.tsv	4247051	cf1ce09f5dd7e0ccf9ff46ef2fd2974b	NO_NFE2L2
	TCGA-22-5483	TCGA-22-5483-01A	TCGA-22-5483-01A-01R-1820-07	LUSC	male	1c31bd56-1ce8-4276-a063-064c6d74033a	fddd9f63-f4af-46b9-9627-f69fcff845ed.rna_seq.augmented_star_gene_counts.tsv	4262651	69fb50722125a49883cae92584e463da	NFE2L2
	TCGA-22-5485	TCGA-22-5485-01A	TCGA-22-5485-01A-01R-1635-07	LUSC	female	a3f8814b-1be9-4a0f-837d-9736315efd57	a11292a9-48f1-4f1b-89af-f43df614c024.rna_seq.augmented_star_gene_counts.tsv	4248175	5ccf1d1828ba0aadc035f3f18d597225	NO_NFE2L2
	TCGA-22-5489	TCGA-22-5489-01A	TCGA-22-5489-01A-01R-1635-07	LUSC	male	18f7582b-048d-4ba2-8035-0a033435b24d	cd708e1f-f522-4736-9350-3d0a5b0cd4fb.rna_seq.augmented_star_gene_counts.tsv	4254160	6cb5503f0d6425420ff05a7ea03d457d	NO_NFE2L2
	TCGA-22-5491	TCGA-22-5491-01A	TCGA-22-5491-01A-01R-1635-07	LUSC	male	6661360a-3532-4876-a994-580d1bba454e	399ad5f4-8c56-4de9-82ec-bcddc45700b3.rna_seq.augmented_star_gene_counts.tsv	4251146	57fe562c9b4368a7e514aa5c7d3af7ba	NO_NFE2L2
	TCGA-22-5492	TCGA-22-5492-01A	TCGA-22-5492-01A-01R-1635-07	LUSC	female	da204644-aaaf-48ed-9c8c-3f1ea0a36b3a	ed6ff225-d76a-4941-8fdf-020caac6b00d.rna_seq.augmented_star_gene_counts.tsv	4256288	f4dc1164656c02573a6b9ac9448d8943	NO_NFE2L2
	TCGA-22-A5C4	TCGA-22-A5C4-01A	TCGA-22-A5C4-01A-12R-A27Q-07	LUSC	male	f3705f68-9ed0-4945-9554-5cb2a7dd20dc	f63b906b-4b3b-4dab-b3f9-210baa574ee5.rna_seq.augmented_star_gene_counts.tsv	4258855	f7478c01465f7812e6d0fcfe6f493a24	NO_NFE2L2
	TCGA-33-4532	TCGA-33-4532-01A	TCGA-33-4532-01A-01R-1201-07	LUSC	male	52055266-7b4e-4fc4-bae0-6e39d76cff59	23ba243d-81d5-44b7-a238-5c0e99118e97.rna_seq.augmented_star_gene_counts.tsv	4248812	a8b8bd910f9c407dab2b6b498f19e8b9	KEAP1
	TCGA-33-4533	TCGA-33-4533-01A	TCGA-33-4533-01A-01R-1201-07	LUSC	female	f134bb5f-7ea6-4a38-85a9-150bb7c2eccc	7dfae289-3d0e-4879-8b82-0a59febef625.rna_seq.augmented_star_gene_counts.tsv	4251633	8bdf74342d0c00430915a218aee08a5d	NO_NFE2L2
	TCGA-33-4538	TCGA-33-4538-01A	TCGA-33-4538-01A-01R-1201-07	LUSC	male	8c031ef8-4038-453e-a5e6-db3198657233	06cbd6ea-06b8-408f-96b3-aeff8b977b1e.rna_seq.augmented_star_gene_counts.tsv	4243879	dcbbdd818dad7e393bcba1e744baff3c	KEAP1
	TCGA-33-4547	TCGA-33-4547-01A	TCGA-33-4547-01A-01R-1201-07	LUSC	male	89d32b82-e00c-41f6-a8d3-3b9565be312c	87f4b300-f0c7-417d-b650-e3e1a565e3f1.rna_seq.augmented_star_gene_counts.tsv	4245022	bfc3f9fda02ed17d1c288c6a6640134e	NO_NFE2L2
	TCGA-33-4566	TCGA-33-4566-01A	TCGA-33-4566-01A-01R-1443-07	LUSC	male	fa688f22-0772-4994-b019-0f3e23b3bf12	079b5158-da4f-4da0-a9fd-dc54e52ba307.rna_seq.augmented_star_gene_counts.tsv	4202259	7f7568abfe39e30947698f9930a692b2	NO_NFE2L2
	TCGA-33-4582	TCGA-33-4582-01A	TCGA-33-4582-01A-01R-1443-07	LUSC	male	404d7866-9cac-48fa-86e4-7215cad5cf27	0d3cfbc0-4420-48ed-a459-2e18d2ece5b6.rna_seq.augmented_star_gene_counts.tsv	4235997	ec9a019890e1efb361891b66a71e3780	NO_NFE2L2
	TCGA-33-4583	TCGA-33-4583-01A	TCGA-33-4583-01A-01R-1443-07	LUSC	male	dcbc607b-f0c0-4771-b5eb-2f8defb490a9	4c87674d-dd05-490d-a584-84490509f4d4.rna_seq.augmented_star_gene_counts.tsv	4205783	d5d7dbad93c0403fca681cc8e5c8ba26	CUL3
	TCGA-33-4586	TCGA-33-4586-01A	TCGA-33-4586-01A-01R-1443-07	LUSC	male	676b25a9-1156-4b4e-84ed-94d4d3b2250b	70177a4f-8302-49f5-942f-53c2f431cdac.rna_seq.augmented_star_gene_counts.tsv	4242552	862a25e1c6f4ff6c019f41a33dba443d	NFE2L2_CUL3
	TCGA-33-4587	TCGA-33-4587-01A	TCGA-33-4587-01A-11R-2125-07	LUSC	female	3b850000-76d1-4070-8bed-52add20750d0	4848c180-254b-4b08-977d-872aabfaee29.rna_seq.augmented_star_gene_counts.tsv	4262313	7ea75e980ac5839562fb8df572553298	NO_NFE2L2
	TCGA-33-4589	TCGA-33-4589-01A	TCGA-33-4589-01A-01R-1443-07	LUSC	female	fb103781-9cee-4e30-a864-3d4e9c5b32ae	ca5bd52a-18cb-4443-b335-7ffdc367d19d.rna_seq.augmented_star_gene_counts.tsv	4213815	148f52d5dc97b7827c56372127677e6c	NFE2L2
X	TCGA-33-6737	TCGA-33-6737-01A	TCGA-33-6737-01A-11R-1820-07	LUSC	male	00bc0fe4-481a-4893-b57e-d5113a6bcce2	6cc2062d-6c21-4bf6-b2e1-cd8e2aa71235.rna_seq.augmented_star_gene_counts.tsv	4248106	5add3a9af5beeb7f650f58bdcdb2601b		No mutation data
	TCGA-33-6738	TCGA-33-6738-01A	TCGA-33-6738-01A-11R-1949-07	LUSC	male	a6e85696-c0ad-45b1-aa18-7293346d30f1	ebbbd946-8af3-464c-8bae-e9c8a889d9b3.rna_seq.augmented_star_gene_counts.tsv	4241525	0c6524130674f59060429122db52ac87	KEAP1
	TCGA-33-A4WN	TCGA-33-A4WN-01A	TCGA-33-A4WN-01A-11R-A262-07	LUSC	male	d6e77785-08d1-4b50-b97a-4e927cbb1669	4936e396-7bec-4b5b-936a-029889e5d271.rna_seq.augmented_star_gene_counts.tsv	4241540	f4e0cd4b77427fb13bdddf0baf1889c9	NO_NFE2L2
	TCGA-33-A5GW	TCGA-33-A5GW-01A	TCGA-33-A5GW-01A-11R-A27Q-07	LUSC	male	5ae6a0f5-4613-450d-8be0-9a126f4eea1f	2dab1294-36b0-438c-8dda-b97e17f03eed.rna_seq.augmented_star_gene_counts.tsv	4232193	d2021e68409bec5adb100dd72a4a221b	NO_NFE2L2
	TCGA-33-AAS8	TCGA-33-AAS8-01A	TCGA-33-AAS8-01A-11R-A405-07	LUSC	female	c3ecd703-d8a8-4f30-aff7-9ba12b40ac70	1827bc9b-0b11-493a-af09-17d13f57698a.rna_seq.augmented_star_gene_counts.tsv	4240029	b9cbcf282c23c2ac02072e51a67a0d62	NFE2L2
	TCGA-33-AASB	TCGA-33-AASB-01A	TCGA-33-AASB-01A-11R-A405-07	LUSC	male	9c89501c-973f-4476-9553-5b72646849af	6d01027b-16e7-4227-bc8c-955678a3313b.rna_seq.augmented_star_gene_counts.tsv	4241614	7408a800f45da03fee3ea88fba93a960	KEAP1
	TCGA-33-AASD	TCGA-33-AASD-01A	TCGA-33-AASD-01A-11R-A405-07	LUSC	male	fa752ca7-ed6f-44cc-b19d-3de8613aaf89	b3f3ba70-bfce-4e13-bb38-8bc070ccb07f.rna_seq.augmented_star_gene_counts.tsv	4243686	65060f9649aabe5fd0277edb7e2a5123	KEAP1
	TCGA-33-AASI	TCGA-33-AASI-01A	TCGA-33-AASI-01A-22R-A405-07	LUSC	female	0570d9f9-d665-408c-b30b-66212ddaf838	f8609415-9d7c-4903-a088-1852f68fc971.rna_seq.augmented_star_gene_counts.tsv	4230928	699c4618eb1d812a25dddc0d1cd80109	NO_NFE2L2
	TCGA-33-AASJ	TCGA-33-AASJ-01A	TCGA-33-AASJ-01A-11R-A405-07	LUSC	male	858abd7d-396c-4dd3-b570-94f99ac9b9c0	2274e33f-7c66-441f-b480-044b26c44a6a.rna_seq.augmented_star_gene_counts.tsv	4235200	f25c8847b2f6bd6cd1dc3c7ac8727191	KEAP1
	TCGA-33-AASL	TCGA-33-AASL-01A	TCGA-33-AASL-01A-11R-A405-07	LUSC	female	4f7d265c-1060-4d43-9846-03fdb3d77bf1	08f10974-e170-4110-92a9-8bf0a345582a.rna_seq.augmented_star_gene_counts.tsv	4230331	917cd3e0d1ad25668dab8331053fc693	NO_NFE2L2
	TCGA-34-2596	TCGA-34-2596-01A	TCGA-34-2596-01A-01R-0851-07	LUSC	male	89651118-9b55-44a9-a05f-d1b9cee5271c	83d26edb-c1e0-4de3-aa5c-b22817dddb83.rna_seq.augmented_star_gene_counts.tsv	4252048	b820fb723cdbff1e02cc4716f36838f1	NFE2L2
	TCGA-34-2600	TCGA-34-2600-01A	TCGA-34-2600-01A-01R-0851-07	LUSC	female	ab2a89cd-3706-4aa5-9d93-e32fc904c51d	a819f9d2-3541-4d39-be2d-dd70750daefe.rna_seq.augmented_star_gene_counts.tsv	4248359	b56c647cc0ced1f2a9eee5d73fa5bb35	NO_NFE2L2
	TCGA-34-2608	TCGA-34-2608-01A	TCGA-34-2608-01A-02R-0851-07	LUSC	male	f9c798c4-0efd-4887-8535-6e2e0298556e	42aeebe7-20fc-463e-84a4-90964a61c5fb.rna_seq.augmented_star_gene_counts.tsv	4250795	98f13c3bfb796e7f07704db7a2f5ae10	NO_NFE2L2
	TCGA-34-5231	TCGA-34-5231-01A	TCGA-34-5231-01A-21R-1820-07	LUSC	male	354b3238-51a1-4b08-95a8-50fde7e51b13	03ef99c7-55b7-4770-9eac-2ee007aa78ca.rna_seq.augmented_star_gene_counts.tsv	4267935	dec193932192736642dfae803f023ac7	NO_NFE2L2
	TCGA-34-5232	TCGA-34-5232-01A	TCGA-34-5232-01A-21R-1820-07	LUSC	female	fb399a7d-2be6-4f54-88de-9b0b4165a8d3	2074d1ae-266e-4fc3-af06-dd3272fc4dee.rna_seq.augmented_star_gene_counts.tsv	4260979	21aec4e7fbd389e0206be5c72ceed272	NO_NFE2L2
	TCGA-34-5234	TCGA-34-5234-01A	TCGA-34-5234-01A-01R-1635-07	LUSC	female	d1d499d9-b57f-42ce-9551-f9f18efdbf07	065e0bd3-5bd5-4dae-8711-e90c87a2d2eb.rna_seq.augmented_star_gene_counts.tsv	4244950	33d99d36e35eb13ea42926b914683f8a	NO_NFE2L2
	TCGA-34-5236	TCGA-34-5236-01A	TCGA-34-5236-01A-21R-1820-07	LUSC	male	aed4a5df-f3ea-42de-b060-4b2167a3e3fc	17a97909-f89d-46c2-8589-657ee85644cf.rna_seq.augmented_star_gene_counts.tsv	4264955	0fe40a8d844ec1be220dbea503e58b95	NO_NFE2L2
	TCGA-34-5239	TCGA-34-5239-01A	TCGA-34-5239-01A-21R-1820-07	LUSC	male	bd1636e9-49de-459a-acc6-4cb0c4a80c45	5bc83672-ab34-40f9-928c-00412b245b5b.rna_seq.augmented_star_gene_counts.tsv	4265328	856d07d22b51bcd875a4f9b764a3a674	NO_NFE2L2
	TCGA-34-5240	TCGA-34-5240-01A	TCGA-34-5240-01A-01R-1443-07	LUSC	female	5df6cdee-9f9e-4dfe-9f40-72727a9e0b15	58c8c207-21f4-489a-87e8-d1493970482d.rna_seq.augmented_star_gene_counts.tsv	4240910	2d7871a6db363ac120609d7a8b3a97bd	NFE2L2
	TCGA-34-5241	TCGA-34-5241-01A	TCGA-34-5241-01A-01R-1443-07	LUSC	male	96c4cf1d-ca50-4abb-81fd-4eb090111a4c	5b2ab630-763b-4efa-9681-fc3c8f65aa2f.rna_seq.augmented_star_gene_counts.tsv	4245793	916b5fe5fc6626145501eb41731de8ff	NO_NFE2L2
	TCGA-34-5927	TCGA-34-5927-01A	TCGA-34-5927-01A-11R-1820-07	LUSC	female	4213466a-89e1-4273-92b0-948e921fd59a	8c686928-1b0b-409b-90c4-c18015a70b52.rna_seq.augmented_star_gene_counts.tsv	4267135	4886ac64cc43d3cd42ff6a69469247b3	NO_NFE2L2
	TCGA-34-5928	TCGA-34-5928-01A	TCGA-34-5928-01A-11R-1820-07	LUSC	female	97a2d0b9-cb59-4ae9-83f0-36f81c1c9474	f2ccfb4a-85a4-44a7-855a-d91a80fee485.rna_seq.augmented_star_gene_counts.tsv	4261059	90e39adc0400c9c97be211ff1523fa10	CUL3
	TCGA-34-5929	TCGA-34-5929-01A	TCGA-34-5929-01A-11R-1820-07	LUSC	female	ef5d5338-8447-46d7-b573-4c812f540b32	259db864-6729-43ac-afc3-e7e47f308bd7.rna_seq.augmented_star_gene_counts.tsv	4269301	9b468f9dca30f9ae71a3daca9b1e214c	NO_NFE2L2
	TCGA-34-7107	TCGA-34-7107-01A	TCGA-34-7107-01A-11R-1949-07	LUSC	male	c7806e11-290c-49e1-90ef-75941b441fce	c1d52374-fc57-4ffe-85df-8352ed9c736e.rna_seq.augmented_star_gene_counts.tsv	4248600	9c865c86c72320d9ed222f8f2bdbfcb3	NO_NFE2L2
	TCGA-34-8454	TCGA-34-8454-01A	TCGA-34-8454-01A-11R-2326-07	LUSC	female	6602a055-2305-48a2-9c54-8a29778c5644	e83faec0-340e-4d7a-b56f-dfe285e6b794.rna_seq.augmented_star_gene_counts.tsv	4242218	183aad4f4cd026fa502c492ea11c3b16	NO_NFE2L2
	TCGA-34-8455	TCGA-34-8455-01A	TCGA-34-8455-01A-11R-2326-07	LUSC	male	2e192b44-dac3-477b-bc68-65d46b8c1a64	aa231a79-e3be-4103-8a91-e6c1536db843.rna_seq.augmented_star_gene_counts.tsv	4232442	801815c4b22f765a1274bd3a3e4b3556	NO_NFE2L2
	TCGA-34-8456	TCGA-34-8456-01A	TCGA-34-8456-01A-21R-2326-07	LUSC	female	913909bf-6da5-4af5-ad86-017f0f0743e0	82051b71-71ff-402a-a97b-d402e0e8b32b.rna_seq.augmented_star_gene_counts.tsv	4240399	887b54f366cb73dbbb4ba77ab0ffb4cd	NO_NFE2L2
	TCGA-34-A5IX	TCGA-34-A5IX-01A	TCGA-34-A5IX-01A-12R-A27Q-07	LUSC	male	cb658a1b-527a-4b66-b067-15da400f4b75	a56eda92-fe42-4f19-b5e0-6eb53fec92b5.rna_seq.augmented_star_gene_counts.tsv	4224030	b7cf65b4d757751cab28e5f5442f829f	NO_NFE2L2
	TCGA-37-3783	TCGA-37-3783-01A	TCGA-37-3783-01A-01R-1201-07	LUSC	male	5fb9c871-c521-4253-ab5e-135d23b8230a	6bd8c4ec-61c9-426a-8ad1-8becd5d8cdc9.rna_seq.augmented_star_gene_counts.tsv	4231384	6e52f0391d939ff255eecfcf6f474289	NO_NFE2L2
	TCGA-37-3789	TCGA-37-3789-01A	TCGA-37-3789-01A-01R-0980-07	LUSC	male	6babd1cf-b5e2-4a88-bcfa-b1a2da49f768	edcec9e8-6543-45e3-a084-0ad60883f24b.rna_seq.augmented_star_gene_counts.tsv	4246039	f34faa59a55650af21f4d89cb1e3c966	NO_NFE2L2
	TCGA-37-3792	TCGA-37-3792-01A	TCGA-37-3792-01A-01R-0980-07	LUSC	male	2acf1776-9f3a-4fa4-a983-8ab127123434	cb34d915-1b13-4c29-ac2b-743ea3ea78ec.rna_seq.augmented_star_gene_counts.tsv	4245058	c02081b9524a8a4ae6f2ebf1c5127fd2	NO_NFE2L2
	TCGA-37-4129	TCGA-37-4129-01A	TCGA-37-4129-01A-01R-1100-07	LUSC	female	ca8f1add-4462-4cc3-9c26-f245bbac303b	3816bf59-c375-4158-bc24-ad8748f9488e.rna_seq.augmented_star_gene_counts.tsv	4250474	ccb50b26ea309ca64109f26103cba556	NO_NFE2L2
	TCGA-37-4130	TCGA-37-4130-01A	TCGA-37-4130-01A-01R-1100-07	LUSC	male	e24c79d8-899c-48bd-8a20-0a848cdb9993	c1a63ccc-f2a3-48eb-b010-09727bf16e43.rna_seq.augmented_star_gene_counts.tsv	4231842	d01cd6ebabfe18936774b1067d812674	NO_NFE2L2
	TCGA-37-4132	TCGA-37-4132-01A	TCGA-37-4132-01A-01R-1100-07	LUSC	female	e1a0a027-6a72-4cb0-8324-cc661f18abe4	d9368b67-bd37-475a-810b-f0ec243c4e8f.rna_seq.augmented_star_gene_counts.tsv	4241932	4a941e251aba7623555ea9c8c5f90909	KEAP1
	TCGA-37-4133	TCGA-37-4133-01A	TCGA-37-4133-01A-01R-1100-07	LUSC	male	3be772ed-21fa-4d87-9e58-fc9f9b7b9323	8fa46159-7340-44ad-894f-f611ecead93d.rna_seq.augmented_star_gene_counts.tsv	4236950	fd34161fc6f3825df3cb4ca5e2671c26	KEAP1
	TCGA-37-4135	TCGA-37-4135-01A	TCGA-37-4135-01A-01R-1100-07	LUSC	male	df995d66-d541-42e4-935e-198829fbecb2	7348a0dd-4824-478c-95e9-fd7107c247b6.rna_seq.augmented_star_gene_counts.tsv	4235911	ccaa5f0e5d09de132f6164402ed99f1e	NO_NFE2L2
	TCGA-37-4141	TCGA-37-4141-01A	TCGA-37-4141-01A-02R-1100-07	LUSC	female	fc958a6c-f283-4047-9450-269e2c99c8ad	e9b6c7e0-9aae-435d-9c1c-b890df3498e3.rna_seq.augmented_star_gene_counts.tsv	4256319	8e80bfcfbf0e6f665f0206ad4c428147	CUL3
	TCGA-37-5819	TCGA-37-5819-01A	TCGA-37-5819-01A-01R-1635-07	LUSC	male	9cbc81e9-686a-4178-9b36-fa90df8627cb	427b83ae-476d-4cf7-826d-69e4baa277e8.rna_seq.augmented_star_gene_counts.tsv	4249179	61bd2792d6a35ca063769e0691672cf1	NO_NFE2L2
	TCGA-37-A5EL	TCGA-37-A5EL-01A	TCGA-37-A5EL-01A-11R-A26W-07	LUSC	male	253c29f2-5477-44ae-9aec-eff82b3a977b	d1260fd0-0029-4949-a411-5786341e0c6b.rna_seq.augmented_star_gene_counts.tsv	4250392	cb550fd57a21912bce7bded9e1695487	NO_NFE2L2
X	TCGA-37-A5EM	TCGA-37-A5EM-01A	TCGA-37-A5EM-01A-21R-A27Q-07	LUSC	male	ac55bde0-199a-410d-8127-e2ac2a320e2b	b3318acf-3b21-4d6c-beb9-0c18a18a484d.rna_seq.augmented_star_gene_counts.tsv	4241718	ffbf96e50847d45c76a702159aece835		No mutation data
	TCGA-37-A5EN	TCGA-37-A5EN-01A	TCGA-37-A5EN-01A-21R-A26W-07	LUSC	male	4473e5ec-dee9-462c-8433-c51b29c4626e	0e47b8bb-679b-4942-8759-7388abe9aacb.rna_seq.augmented_star_gene_counts.tsv	4232792	f4bf09480d191ae8f778d75384d2d7ad	KEAP1
	TCGA-39-5011	TCGA-39-5011-01A	TCGA-39-5011-01A-01R-1443-07	LUSC	female	89cdd19d-b0ee-4ae8-ac32-b2c938058472	570f101c-637a-453c-946d-795b7ae05ff9.rna_seq.augmented_star_gene_counts.tsv	4241656	1627aaf03c3899affd42cd2e207577da	KEAP1
	TCGA-39-5016	TCGA-39-5016-01A	TCGA-39-5016-01A-01R-1443-07	LUSC	male	01977422-7f46-41d2-bc19-ed0093af8f25	4530f311-bd26-406c-a977-e62ad5cb5b31.rna_seq.augmented_star_gene_counts.tsv	4243752	6eb48fbab885ed38abbfff216057fdb8	CUL3
	TCGA-39-5019	TCGA-39-5019-01A	TCGA-39-5019-01A-01R-1820-07	LUSC	male	67cef8d6-bb60-4f32-b55e-4b0e32bc4b0d	d9a25b27-6aa7-4f70-be70-0250ab016de4.rna_seq.augmented_star_gene_counts.tsv	4267575	f981256c380ef0f9b1ce5dab8cbbc845	NO_NFE2L2
	TCGA-39-5021	TCGA-39-5021-01A	TCGA-39-5021-01A-01R-1443-07	LUSC	male	f31f1008-cde3-4ca6-8864-8b1e7efbb856	2cb035a7-cdfd-4833-afcf-28b3a116634e.rna_seq.augmented_star_gene_counts.tsv	4238058	c45b44c0cebb6d5872b2df6eee669e62	CUL3
	TCGA-39-5022	TCGA-39-5022-01A	TCGA-39-5022-01A-21R-1820-07	LUSC	male	9a67ded0-92b0-48a4-bed8-43f944ff2acd	0a8cfb56-ee6e-4cef-b35f-38c3bdf21817.rna_seq.augmented_star_gene_counts.tsv	4259883	16276c98b26d8a40134c627afa5c0bd6	NFE2L2
	TCGA-39-5024	TCGA-39-5024-01A	TCGA-39-5024-01A-21R-1820-07	LUSC	female	d980f19b-9abc-4241-afd0-5c34092bf095	06a9f429-7bea-4d5e-928f-a8cde8d19aa4.rna_seq.augmented_star_gene_counts.tsv	4252374	5b2b8bacb46bf14d4597d48df781bfac	NO_NFE2L2
	TCGA-39-5027	TCGA-39-5027-01A	TCGA-39-5027-01A-21R-1820-07	LUSC	male	7287d9fa-e48f-4de8-b7f0-a7af8c34fdf8	586ca62f-274c-4c9f-907f-6a8e87486aae.rna_seq.augmented_star_gene_counts.tsv	4251400	005910dd0de57764a4e43f458cee187a	NO_NFE2L2
	TCGA-39-5028	TCGA-39-5028-01A	TCGA-39-5028-01A-01R-1443-07	LUSC	male	a2ff795f-2f9f-4a67-a8e8-5d1b70f397d8	77b0bb2f-6e9f-4c67-b64c-98eebf0bd99d.rna_seq.augmented_star_gene_counts.tsv	4245265	a94ff206d1abf6b2b8aae3fdd34f8356	NO_NFE2L2
	TCGA-39-5029	TCGA-39-5029-01A	TCGA-39-5029-01A-01R-1443-07	LUSC	male	74efe20f-a90d-4818-b633-9c8a100ce5a8	abf2b5e0-2003-4b5c-95e9-be2b4c4bc135.rna_seq.augmented_star_gene_counts.tsv	4246240	6eaa5b3736ac4c49e0e5597b616d1333	NO_NFE2L2
	TCGA-39-5030	TCGA-39-5030-01A	TCGA-39-5030-01A-01R-1443-07	LUSC	female	5cea4106-64fd-4d00-b978-d5ba676ded7b	41249f0b-c186-4917-8b6a-1eca9647fadc.rna_seq.augmented_star_gene_counts.tsv	4230906	37e4b6552dbedb8be1f1cc9961bb185d	NO_NFE2L2
	TCGA-39-5031	TCGA-39-5031-01A	TCGA-39-5031-01A-01R-1443-07	LUSC	female	e4d47a4b-0dd3-471f-86e7-7c682d646e98	37be25e5-fb01-48f0-b300-99db08d9250c.rna_seq.augmented_star_gene_counts.tsv	4255147	5dff7195b84675cc32ebe368532cad5a	NO_NFE2L2
	TCGA-39-5034	TCGA-39-5034-01A	TCGA-39-5034-01A-01R-1443-07	LUSC	female	69537a05-0fdb-4e2b-8343-ae2169965aed	7c38a399-6670-41d0-87d6-503ba3f39ef7.rna_seq.augmented_star_gene_counts.tsv	4228807	182bbcd39d87cd24cbf592eb8a208201	CUL3_KEAP1
	TCGA-39-5035	TCGA-39-5035-01A	TCGA-39-5035-01A-01R-1443-07	LUSC	female	4b167e70-e4e6-47f7-9fe9-11cf20f0d442	38ed7a69-e4a7-4990-aa36-d3537d451e3b.rna_seq.augmented_star_gene_counts.tsv	4231876	fb9592b73fff936831f4619fd4c2b7ed	NO_NFE2L2
	TCGA-39-5036	TCGA-39-5036-01A	TCGA-39-5036-01A-01R-1443-07	LUSC	male	5dad1e97-fad2-4865-90fd-baf08a0b0c53	5ac5e409-ce51-4c5d-906c-7f7612f6d0a4.rna_seq.augmented_star_gene_counts.tsv	4234221	38565390f470c458e21d93813b6490c8	KEAP1
	TCGA-39-5037	TCGA-39-5037-01A	TCGA-39-5037-01A-01R-1443-07	LUSC	male	69b1be88-cae1-4715-be96-a7cd684aa38d	5be00410-2c68-4327-a196-656f4e388d10.rna_seq.augmented_star_gene_counts.tsv	4241624	5be1e9d5b98db99a476a1905efb9f7c0	NO_NFE2L2
	TCGA-39-5039	TCGA-39-5039-01A	TCGA-39-5039-01A-01R-1443-07	LUSC	male	75969880-a360-4e72-afe4-752dd6f04289	b9a5766c-e155-423e-a075-10fb14fe87df.rna_seq.augmented_star_gene_counts.tsv	4227153	884eeaa5daa609312d1cc7a362bae463	NO_NFE2L2
	TCGA-39-5040	TCGA-39-5040-01A	TCGA-39-5040-01A-21R-2125-07	LUSC	male	7c59b296-82f3-4bd4-978b-5cae1cbef1e8	8eabe76e-2392-4796-9c4d-a69f5514ec99.rna_seq.augmented_star_gene_counts.tsv	4250447	1be1fec6ff71cdca7dba6d2d2857a60b	NO_NFE2L2
	TCGA-43-2576	TCGA-43-2576-01A	TCGA-43-2576-01A-01R-A32Z-07	LUSC	female	be19e560-e5b5-4cf2-aba3-295335d046c9	1fc1521d-7cb1-4a33-b6ed-efee9edc87e2.rna_seq.augmented_star_gene_counts.tsv	4231051	3059523cb5b698b929103fcaaad179b3	NO_NFE2L2
	TCGA-43-2578	TCGA-43-2578-01A	TCGA-43-2578-01A-01R-0851-07	LUSC	female	64f6f88f-372d-46a3-8fd5-2c88464b9177	544990ea-0a22-4bc5-8f14-ffc9999f2572.rna_seq.augmented_star_gene_counts.tsv	4250020	b3181f37e97b8ff8008de895dc7f369a	KEAP1
	TCGA-43-2581	TCGA-43-2581-01A	TCGA-43-2581-01A-01R-0851-07	LUSC	female	efcf7073-faf4-4965-9e86-49b44788620e	b179ba6e-42d8-4133-90a2-291ae8f19569.rna_seq.augmented_star_gene_counts.tsv	4241032	a0e38f76d00b6aada3575096c0fb1473	NO_NFE2L2
	TCGA-43-3394	TCGA-43-3394-01A	TCGA-43-3394-01A-01R-0980-07	LUSC	male	a2541c72-d02f-4acb-8d35-537080c94ea8	61192f9b-94eb-49f4-b2b5-eafe75092930.rna_seq.augmented_star_gene_counts.tsv	4253896	20c1f863ded5948cc8391e3afa42c932	NO_NFE2L2
	TCGA-43-3920	TCGA-43-3920-01A	TCGA-43-3920-01A-01R-0980-07	LUSC	male	a3dcf971-3667-4b2e-af2e-005bfe05225d	a00e31c2-0eb8-49eb-a91b-dd36502bf5cc.rna_seq.augmented_star_gene_counts.tsv	4245905	0882833401508fef543cf8b614939d9a	NO_NFE2L2
	TCGA-43-5668	TCGA-43-5668-01A	TCGA-43-5668-01A-01R-1635-07	LUSC	male	89757795-017d-40e2-ba48-e7a19fb69b94	6b717b71-a34d-45af-a27e-ce77484d14f2.rna_seq.augmented_star_gene_counts.tsv	4254342	47fbdda1b441bf5e46f5aefa90ed434b	NO_NFE2L2
	TCGA-43-5670	TCGA-43-5670-01A	TCGA-43-5670-01A-21R-2125-07	LUSC	male	056fd446-19f7-4d9f-975b-ca8d2c2e944a	ecee2642-e793-457d-a325-320a785c917c.rna_seq.augmented_star_gene_counts.tsv	4246549	3de5e34c29dcc4e1b0da594a9f9be3ea	NO_NFE2L2
	TCGA-43-6143	TCGA-43-6143-01A	TCGA-43-6143-01A-11R-1820-07	LUSC	male	2f558b20-191a-4773-84f0-e8e61cef283b	3953b63a-1a63-4e97-b683-ae905b55e03e.rna_seq.augmented_star_gene_counts.tsv	4272998	3431db12b4ea6b6a2c6f0ea0d5b3b254	KEAP1
	TCGA-43-6647	TCGA-43-6647-01A	TCGA-43-6647-01A-11R-1820-07	LUSC	female	3c9482b7-95fe-40b3-b535-4b92af0a5303	b9184c47-1ce0-42d6-bd30-702c960d2fe0.rna_seq.augmented_star_gene_counts.tsv	4244874	51adf6258319ca6f0ecfe258e28afb3e	NO_NFE2L2
	TCGA-43-6770	TCGA-43-6770-01A	TCGA-43-6770-01A-11R-1820-07	LUSC	female	f9c280f7-4975-4970-806d-2cf4b94ccf74	7733c278-8e2b-4d6f-9e28-82256ea05035.rna_seq.augmented_star_gene_counts.tsv	4266117	19285a7294a41a1a4ba469e0122aafbb	NO_NFE2L2
	TCGA-43-6771	TCGA-43-6771-01A	TCGA-43-6771-01A-11R-1820-07	LUSC	male	61281e25-4a72-4567-b7d1-4ab5ce586235	de204810-46e9-487e-8163-3103bc7d1544.rna_seq.augmented_star_gene_counts.tsv	4240103	b5d46be1ce9aa5a261479e9cca72ff4a	NO_NFE2L2
	TCGA-43-6773	TCGA-43-6773-01A	TCGA-43-6773-01A-41R-1949-07	LUSC	male	cfcbccac-2ccf-4b0c-b228-19bf5c21d2e1	2c18ce3b-cd22-4d25-b643-f98768ffa41a.rna_seq.augmented_star_gene_counts.tsv	4230339	61cf3b87beeb7196310472e04427757b	NO_NFE2L2
	TCGA-43-7656	TCGA-43-7656-01A	TCGA-43-7656-01A-11R-2125-07	LUSC	male	bb947fec-f1b9-4e90-9529-68bcd9dff068	df8be527-65a7-472f-8b77-beb413809525.rna_seq.augmented_star_gene_counts.tsv	4249188	5e1e7eabbd881ccff7c919a2ce31c6a2	NO_NFE2L2
	TCGA-43-7657	TCGA-43-7657-01A	TCGA-43-7657-01A-31R-2125-07	LUSC	female	4236170e-67b4-4bd7-badd-4fcba557d0e3	6df80c92-775e-4bcf-b2c7-6cbd7e147447.rna_seq.augmented_star_gene_counts.tsv	4249006	606d0476192601004d5e7562d4b0886d	NO_NFE2L2
	TCGA-43-7658	TCGA-43-7658-01A	TCGA-43-7658-01A-11R-2125-07	LUSC	female	33ff6f1e-2bf3-4238-a329-f84cb9c28583	547d5d18-2066-48d0-bc08-4d356016567c.rna_seq.augmented_star_gene_counts.tsv	4266163	14420005cf4d72972ac48d288510319f	NO_NFE2L2
	TCGA-43-8115	TCGA-43-8115-01A	TCGA-43-8115-01A-11R-2247-07	LUSC	female	035e88ea-e471-434a-8b93-ea7cc5776a89	6791cf32-7f47-439e-8d6a-527a5a55bae9.rna_seq.augmented_star_gene_counts.tsv	4241055	fd0d1afa97fb90e0cc4f87e3772d5eb2	NO_NFE2L2
	TCGA-43-8116	TCGA-43-8116-01A	TCGA-43-8116-01A-11R-2247-07	LUSC	male	3f8a842f-7050-4119-9d01-84dc0434cc0d	a32c1e22-0523-41c9-86e5-ee3416aa53c9.rna_seq.augmented_star_gene_counts.tsv	4231841	9ab80e64f2b1172e3fd0773206fb2d33	NO_NFE2L2
	TCGA-43-8118	TCGA-43-8118-01A	TCGA-43-8118-01A-11R-2403-07	LUSC	female	7dc40d65-c112-4490-ab18-9abd95c8825e	a22b62ac-3a98-495c-a64e-8ed21e101d6d.rna_seq.augmented_star_gene_counts.tsv	4243821	729858dbd3e56d2f10c553bbda861c27	NO_NFE2L2
	TCGA-43-A474	TCGA-43-A474-01A	TCGA-43-A474-01A-11R-A24H-07	LUSC	male	c65132d7-6682-423e-a972-0e0b499275b4	924217b0-1e3e-4c5d-91fb-69fd5831532b.rna_seq.augmented_star_gene_counts.tsv	4236174	04fdb8474e7d3f62327e673d5d03673c	CUL3
	TCGA-43-A475	TCGA-43-A475-01A	TCGA-43-A475-01A-11R-A24H-07	LUSC	female	5f656efa-0043-40d4-9276-37971aaf7774	166c4776-e8e3-408b-8320-e65ce57ccd8d.rna_seq.augmented_star_gene_counts.tsv	4250017	dffdb2d7a6b0f5589aada30e5185a234	NO_NFE2L2
	TCGA-43-A56U	TCGA-43-A56U-01A	TCGA-43-A56U-01A-11R-A26W-07	LUSC	female	c9dd0b68-5c32-4686-b1e7-535e7040a5aa	778964ec-c580-4252-8ec6-690161698cd3.rna_seq.augmented_star_gene_counts.tsv	4240023	4f5e0ac25a1c3ba96617053abee65691	NO_NFE2L2
	TCGA-43-A56V	TCGA-43-A56V-01A	TCGA-43-A56V-01A-11R-A26W-07	LUSC	male	5bea52d9-2898-404f-ba71-ffc845d1b226	50f7bf08-3f8b-492b-afdc-40b4f35060bf.rna_seq.augmented_star_gene_counts.tsv	4243390	bf51002e45fe101175b0302b0cbbbb23	NO_NFE2L2
	TCGA-46-3765	TCGA-46-3765-01A	TCGA-46-3765-01A-01R-0980-07	LUSC	female	497349a9-7f70-4dba-8b56-a3c890c3f161	78cee282-02b1-40d2-9acc-668b3f3e7e72.rna_seq.augmented_star_gene_counts.tsv	4236881	8a2bf3e56cae8321a35099e774dce4fd	NFE2L2
	TCGA-46-3766	TCGA-46-3766-01A	TCGA-46-3766-01A-01R-0980-07	LUSC	female	c70afde9-ba58-47e4-aeec-508a8116418a	029a2c3e-0fd1-4cb4-9021-3947d28ca28d.rna_seq.augmented_star_gene_counts.tsv	4228169	31eda780238a2b1aa287464b97dc5fe6	NO_NFE2L2
	TCGA-46-3767	TCGA-46-3767-01A	TCGA-46-3767-01A-01R-0980-07	LUSC	male	efa06ac0-ad77-4be1-a131-e73033285d7b	df2d0059-e735-4871-96c9-89004db0561a.rna_seq.augmented_star_gene_counts.tsv	4241050	e4f6c621f8aba37ee295d92de8ef9207	NO_NFE2L2
	TCGA-46-3768	TCGA-46-3768-01A	TCGA-46-3768-01A-01R-0980-07	LUSC	male	dedf9f52-7ded-4cc5-bba2-da89a48b5176	817c0e00-e7f9-44c1-97da-1d1a4bc97b0b.rna_seq.augmented_star_gene_counts.tsv	4242713	958f6aa228e42f12bcb555dbdbaa19ee	NFE2L2
	TCGA-46-3769	TCGA-46-3769-01A	TCGA-46-3769-01A-01R-0980-07	LUSC	male	3b556c43-5216-41d8-93c3-bb4877918a6f	b41b255d-ae3f-46c5-9246-0a35559e90cc.rna_seq.augmented_star_gene_counts.tsv	4243112	b33f5d452fef5008c711969a8f410ff7	NO_NFE2L2
	TCGA-46-6025	TCGA-46-6025-01A	TCGA-46-6025-01A-11R-1820-07	LUSC	male	08d31f4a-d87e-4413-8446-8ba45c97d63e	7d39dccd-38b6-42fd-b8c8-ac45b78fdaac.rna_seq.augmented_star_gene_counts.tsv	4249850	5d350471d3b0bc62b778000ec16ba601	KEAP1
	TCGA-46-6026	TCGA-46-6026-01A	TCGA-46-6026-01A-11R-1820-07	LUSC	male	966086a2-7a30-42e7-bd34-60942d862258	6d735e36-2e68-4f45-b070-49c997803759.rna_seq.augmented_star_gene_counts.tsv	4267528	199d04b5ef104d223707dad91ee71b8d	NO_NFE2L2
	TCGA-51-4079	TCGA-51-4079-01A	TCGA-51-4079-01A-01R-1100-07	LUSC	female	303615a1-9807-4992-866e-ec93e2ea8ce6	9dfda51c-2256-4c04-a47c-62a04c670a7f.rna_seq.augmented_star_gene_counts.tsv	4237621	66a43c4090bbcb5fbb53d67636a9c294	NFE2L2
	TCGA-51-4080	TCGA-51-4080-01A	TCGA-51-4080-01A-01R-1100-07	LUSC	male	13a1c368-a939-4c81-bb51-8ae31da5ba14	297c207e-88aa-4c14-a513-b7b3f36a9776.rna_seq.augmented_star_gene_counts.tsv	4244783	077cb935ce4515814984458679d5dc25	NO_NFE2L2
	TCGA-51-4081	TCGA-51-4081-01A	TCGA-51-4081-01A-01R-1100-07	LUSC	male	da5d8d97-8144-480d-808e-6a8108738229	5a51e3af-4eb9-474c-8c47-08dd8c178c06.rna_seq.augmented_star_gene_counts.tsv	4243710	e795362956b4a681f1f090045a98a217	NFE2L2_KEAP1
X	TCGA-51-6867	TCGA-51-6867-01A	TCGA-51-6867-01A-11R-2045-07	LUSC	female	6d233871-9022-4a62-b7b2-00f43f645421	7c8ad944-10d4-42d6-a715-ff998730da92.rna_seq.augmented_star_gene_counts.tsv	4253072	dffd37a1382993caf278f3c31688ba6f		No mutation data
	TCGA-52-7622	TCGA-52-7622-01A	TCGA-52-7622-01A-11R-2125-07	LUSC	female	808d3c9f-b9df-4b77-8a42-fbb82786d282	35003294-55e8-4fb5-bdd4-ac8207cf2998.rna_seq.augmented_star_gene_counts.tsv	4258324	ad6146fb844911d96efcf2a4a1f2f3e9	NFE2L2
	TCGA-52-7809	TCGA-52-7809-01A	TCGA-52-7809-01A-21R-2125-07	LUSC	male	44959554-954a-43aa-aa22-1b2db64a790f	fd05ecb5-b9c5-4396-b0f3-82c67b2d70e3.rna_seq.augmented_star_gene_counts.tsv	4263770	4f0a452de0e2ab38e94159abb07a8a84	NO_NFE2L2
	TCGA-52-7810	TCGA-52-7810-01A	TCGA-52-7810-01A-11R-2125-07	LUSC	female	f0599560-eb57-4d05-b9be-09d70aa1baa5	2ffed52e-068e-461e-acc1-a0db838af1e7.rna_seq.augmented_star_gene_counts.tsv	4234758	3c41881038fc9cb3a83caea6e74ab0e8	NO_NFE2L2
	TCGA-52-7811	TCGA-52-7811-01A	TCGA-52-7811-01A-11R-2125-07	LUSC	male	b770f87e-a9a9-4748-8649-86baf9629dad	285c2788-1da0-4ad7-b98c-0d0619b627bd.rna_seq.augmented_star_gene_counts.tsv	4245328	d6eb0ca9fb115eaf38b80df96320cc9d	NO_NFE2L2
	TCGA-52-7812	TCGA-52-7812-01A	TCGA-52-7812-01A-11R-2125-07	LUSC	male	d64e9bd5-868a-4c9b-89a2-5510f4319c75	37b8f665-3b34-46b9-96da-fcb0ce078432.rna_seq.augmented_star_gene_counts.tsv	4237484	f79f2b01162a8c6542b6326c91706ae3	NFE2L2
	TCGA-56-1622	TCGA-56-1622-01A	TCGA-56-1622-01A-01R-0692-07	LUSC	male	469dfcd7-f60f-4f1a-a4da-ed7190f23263	a65fd16f-029c-4e02-ae4f-a3aa67944b95.rna_seq.augmented_star_gene_counts.tsv	4240447	8be77bc2a69b56894e19de3e2ae349c7	NO_NFE2L2
	TCGA-56-5897	TCGA-56-5897-01A	TCGA-56-5897-01A-11R-1635-07	LUSC	male	e63161c7-b824-4056-8eae-682861e88edb	8175545d-b1a7-472e-aa7f-23adaece2ccd.rna_seq.augmented_star_gene_counts.tsv	4242785	1882f20fbd9b7486607d03922254c5b3	NFE2L2
	TCGA-56-5898	TCGA-56-5898-01A	TCGA-56-5898-01A-11R-1635-07	LUSC	male	9d9a39a4-0e09-4c4f-b82b-ae5a49a5b90d	dd0bea70-c22d-4437-955c-0087fbc5abb4.rna_seq.augmented_star_gene_counts.tsv	4241236	8a3513bbb9acb3b6adfc3311dc1d5d45	NO_NFE2L2
	TCGA-56-6545	TCGA-56-6545-01A	TCGA-56-6545-01A-11R-1820-07	LUSC	female	bc6dcc74-df71-4444-bdc8-6d561ed42f64	5d83245d-083a-4728-9637-d1c1c2f69d9f.rna_seq.augmented_star_gene_counts.tsv	4258431	d2e1c2984c29e2b15d89da60dce0e1fa	NO_NFE2L2
	TCGA-56-6546	TCGA-56-6546-01A	TCGA-56-6546-01A-11R-1820-07	LUSC	male	422c741f-5890-46fd-9135-c8534d40ff96	6b8b993a-fefc-4494-a58d-83876b33a534.rna_seq.augmented_star_gene_counts.tsv	4255668	5b87c18c1155b8a37199e55d606244a3	NO_NFE2L2
	TCGA-56-7221	TCGA-56-7221-01A	TCGA-56-7221-01A-11R-2045-07	LUSC	male	f95d3d81-2433-4018-a042-f24b9f04946a	545f9937-b128-4f44-8b12-ded0fb79bf3f.rna_seq.augmented_star_gene_counts.tsv	4254208	b495c83f1e2ea437d2d9292e0a6dc5f5	NO_NFE2L2
	TCGA-56-7222	TCGA-56-7222-01A	TCGA-56-7222-01A-11R-2045-07	LUSC	male	f1478f8b-01d7-42a4-853f-d27bf3199cd6	084a06de-7229-43c3-b2de-95ad57768010.rna_seq.augmented_star_gene_counts.tsv	4239877	1122c40dd2964f2c2695fee248a3eb02	NO_NFE2L2
	TCGA-56-7223	TCGA-56-7223-01A	TCGA-56-7223-01A-11R-2045-07	LUSC	male	6b3887e7-fbf3-402a-bd2d-895ad964dfbe	e37593fe-84a2-427d-88fc-1141f11f2649.rna_seq.augmented_star_gene_counts.tsv	4272138	138a824eb3dabd6f5afd4817162f470b	CUL3
	TCGA-56-7579	TCGA-56-7579-01A	TCGA-56-7579-01A-11R-2045-07	LUSC	male	0827512b-4fd5-405e-ba15-fb69ee8fddba	843d3266-d3bf-4193-b2cc-1146dffd81a2.rna_seq.augmented_star_gene_counts.tsv	4233293	2893ea7903af69e2570e7f205a1f8564	NO_NFE2L2
	TCGA-56-7580	TCGA-56-7580-01A	TCGA-56-7580-01A-11R-2045-07	LUSC	male	f60cd94a-dd5f-4cbb-86e9-c5c97713fd04	58bd16cc-d999-4d09-9205-82cc216a0d88.rna_seq.augmented_star_gene_counts.tsv	4244620	c8a0e17539720cb25fe31a69203bca57	NO_NFE2L2
	TCGA-56-7582	TCGA-56-7582-01A	TCGA-56-7582-01A-11R-2045-07	LUSC	male	0614c3dd-673e-4dd4-9c5b-4311176b34d1	26e083d8-9d89-440c-a98e-22ce75265eff.rna_seq.augmented_star_gene_counts.tsv	4231367	89864aeb6cdd077016a403b1dcaa5b80	NO_NFE2L2
	TCGA-56-7730	TCGA-56-7730-01A	TCGA-56-7730-01A-11R-2125-07	LUSC	male	65f6be62-f7a5-4251-9937-0f46a424822f	c21f3274-ab6e-4272-98db-4d60c1f7c2a6.rna_seq.augmented_star_gene_counts.tsv	4265107	91f39e1fe53711135867f689cf11ac41	KEAP1
	TCGA-56-7731	TCGA-56-7731-01A	TCGA-56-7731-01A-11R-2125-07	LUSC	female	e851fcff-9594-4b7f-8806-d182fee09e0f	688efbed-388c-4af2-886a-222bb100ea28.rna_seq.augmented_star_gene_counts.tsv	4243873	1e2918b35732f9740cea91555382bf1d	NO_NFE2L2
	TCGA-56-7822	TCGA-56-7822-01A	TCGA-56-7822-01A-11R-2125-07	LUSC	male	0811dae6-0c8d-42cf-9384-81649d072407	fe3c3901-fff3-4d66-bf4a-c44783fde75a.rna_seq.augmented_star_gene_counts.tsv	4240639	a40906b21a4bb3dae8a452fe46631af5	NO_NFE2L2
	TCGA-56-7823	TCGA-56-7823-01B	TCGA-56-7823-01B-11R-2247-07	LUSC	female	4bf7a91f-c267-470c-9df1-084aa8637ffe	d13be6e3-c9a9-4ff9-b5fa-6f2aac42dbce.rna_seq.augmented_star_gene_counts.tsv	4224779	59d580a143e774cc4d3dec6a9a61234c	NO_NFE2L2
	TCGA-56-8082	TCGA-56-8082-01A	TCGA-56-8082-01A-11R-2247-07	LUSC	female	d1b72b3b-df9d-49b5-a2f2-b59f283b8735	e10d1f94-3583-4f6a-bc39-0c96bd0f6d8c.rna_seq.augmented_star_gene_counts.tsv	4241317	bd32c5fb4de4ca02262d65e4e806fef3	NO_NFE2L2
	TCGA-56-8083	TCGA-56-8083-01A	TCGA-56-8083-01A-11R-2247-07	LUSC	male	d849e09d-3614-435d-b257-8a895c0249ba	0416296d-5a48-4405-b93b-32190182f308.rna_seq.augmented_star_gene_counts.tsv	4250930	5fe0a1e92294a85e59d4e4b3195a1c0f	NO_NFE2L2
	TCGA-56-8201	TCGA-56-8201-01A	TCGA-56-8201-01A-11R-2247-07	LUSC	male	61972b59-3834-4f86-b340-ee15b1a530ee	a7f3bb2c-c9ee-45be-b507-b1bd20bfb1e6.rna_seq.augmented_star_gene_counts.tsv	4229107	f3b3928a85a0123f279f20fca8978756	NO_NFE2L2
	TCGA-56-8304	TCGA-56-8304-01A	TCGA-56-8304-01A-11R-2326-07	LUSC	female	021326fa-7b6c-45c0-b078-4646c2260068	97b043a9-8872-4f75-be81-aed7d0bd849d.rna_seq.augmented_star_gene_counts.tsv	4228056	847ef91f3552621a994df1289a6fd6e5	NO_NFE2L2
	TCGA-56-8305	TCGA-56-8305-01A	TCGA-56-8305-01A-11R-2296-07	LUSC	male	7ec8a5aa-d1a6-4f3b-b9da-5bc5609f7092	0f286755-ae74-4a1c-b1c2-a1552286a2e7.rna_seq.augmented_star_gene_counts.tsv	4239338	44362fece414b34dd4fabc7f8c5cf86d	NO_NFE2L2
	TCGA-56-8307	TCGA-56-8307-01A	TCGA-56-8307-01A-11R-2296-07	LUSC	female	edb9cba3-6c54-4361-8920-583c0b2606aa	0dab5bf8-abc8-4fba-aa61-8f248378d942.rna_seq.augmented_star_gene_counts.tsv	4241787	54e0f10d49f71ae0c27b39d708f77837	NO_NFE2L2
	TCGA-56-8308	TCGA-56-8308-01A	TCGA-56-8308-01A-11R-2296-07	LUSC	male	41f4ae8d-e832-46e4-aa65-87ba050d39d3	2acc3468-bc59-4cc2-9ab0-95c8a57a9c78.rna_seq.augmented_star_gene_counts.tsv	4236019	5ea11f837b1cb1e00dc27644e5f123a6	NO_NFE2L2
	TCGA-56-8309	TCGA-56-8309-01A	TCGA-56-8309-01A-11R-2296-07	LUSC	male	b246f559-0026-4ca2-97af-2a783e6609c3	1da7fef0-2c51-4851-8e8a-b726a35c2d7a.rna_seq.augmented_star_gene_counts.tsv	4246025	0dde22baeae542a1fedef6db108b6621	NO_NFE2L2
	TCGA-56-8503	TCGA-56-8503-01A	TCGA-56-8503-01A-11R-2403-07	LUSC	female	ae6c036e-8e10-498c-90dd-7eba6a20e7a1	efe530d5-b143-468b-a386-bbe052b12213.rna_seq.augmented_star_gene_counts.tsv	4230263	130d03df71ead4f2823440faf42edddd	NO_NFE2L2
	TCGA-56-8504	TCGA-56-8504-01A	TCGA-56-8504-01A-11R-2403-07	LUSC	male	4b8fa723-5547-4ddd-b09f-04405a35b035	f9cb2d13-67c3-4010-bf9a-3f57361f68da.rna_seq.augmented_star_gene_counts.tsv	4226291	c6d4db7025bf5856ebbc67af17f990e7	KEAP1
	TCGA-56-8622	TCGA-56-8622-01A	TCGA-56-8622-01A-11R-2403-07	LUSC	male	75687790-7c48-4de5-9e8b-6a82ea97ddd1	3bc5448b-cfac-4845-b8f2-368dd96d678a.rna_seq.augmented_star_gene_counts.tsv	4237097	39748ecb9e197e1d674bcb81d48fe98e	NO_NFE2L2
	TCGA-56-8623	TCGA-56-8623-01A	TCGA-56-8623-01A-11R-A28V-07	LUSC	male	cf282dd2-fc71-41e4-a22d-87ea9de78b71	221c0abc-cf42-48ce-aabd-6aa0f84bcf30.rna_seq.augmented_star_gene_counts.tsv	4257317	731b19a63756f2d5eecc8088949a1ff1	NO_NFE2L2
	TCGA-56-8624	TCGA-56-8624-01A	TCGA-56-8624-01A-11R-2403-07	LUSC	male	420d3651-43b4-4345-88dc-8973fb6a40b6	f296ab53-b2c2-4469-a33c-d95821bd6286.rna_seq.augmented_star_gene_counts.tsv	4235711	7c0530ef5e29195de1749b689dd292ad	NO_NFE2L2
	TCGA-56-8625	TCGA-56-8625-01A	TCGA-56-8625-01A-11R-2403-07	LUSC	female	a79328d0-1da2-4a72-a319-2badd03985e3	bcfe99a0-4126-4247-8dcc-c823ce2fdcd5.rna_seq.augmented_star_gene_counts.tsv	4241776	69003e695bcef47b4621381535c3dd8e	NO_NFE2L2
	TCGA-56-8626	TCGA-56-8626-01A	TCGA-56-8626-01A-11R-2403-07	LUSC	male	72913c01-0d2a-4a08-b04c-b2149ca6ad37	5e00d446-846f-4be1-a799-fcfe1ba82c46.rna_seq.augmented_star_gene_counts.tsv	4239825	6814b9afd476f069a042e4fe92795e0f	NO_NFE2L2
	TCGA-56-8628	TCGA-56-8628-01A	TCGA-56-8628-01A-11R-2403-07	LUSC	male	88072165-d1e1-4336-98e9-87188c8acc9b	f16c296f-5678-4d02-80fe-1c328ae733fb.rna_seq.augmented_star_gene_counts.tsv	4245850	a82d87b5cfa87ef839efcdfb4aa798e4	NO_NFE2L2
	TCGA-56-8629	TCGA-56-8629-01A	TCGA-56-8629-01A-11R-2403-07	LUSC	male	2ea24d12-dddd-4628-ab66-5c70805b07e2	996bd4b6-e9a9-475c-8794-be2082131a9f.rna_seq.augmented_star_gene_counts.tsv	4241436	295895975153bf747282c8c1047dc1fc	NFE2L2
	TCGA-56-A49D	TCGA-56-A49D-01A	TCGA-56-A49D-01A-11R-A24H-07	LUSC	male	e79e25d8-4578-4e37-a740-91fba48ef40a	4fc6b327-7b6c-4c17-b15e-7db7bba1565a.rna_seq.augmented_star_gene_counts.tsv	4240915	34b920060e21039562836c8e56943e9a	NO_NFE2L2
	TCGA-56-A4BW	TCGA-56-A4BW-01A	TCGA-56-A4BW-01A-11R-A24H-07	LUSC	male	259941ae-c443-488b-b815-536b7f0d9efd	dc74aff8-2025-4124-8e76-22228174ac5d.rna_seq.augmented_star_gene_counts.tsv	4235804	31233cc377f0729846b7604a93c45a4a	NO_NFE2L2
	TCGA-56-A4BX	TCGA-56-A4BX-01A	TCGA-56-A4BX-01A-11R-A24H-07	LUSC	male	31f0e985-d875-442e-bb0d-842cac9e617f	5ae50fc0-395d-4286-94db-fbbb542f3fc9.rna_seq.augmented_star_gene_counts.tsv	4245832	96f3002c768bf6d84b651e5f20780593	NO_NFE2L2
	TCGA-56-A4BY	TCGA-56-A4BY-01A	TCGA-56-A4BY-01A-11R-A24H-07	LUSC	male	460ef0b3-7898-4f4d-94a0-21a6aa7440e1	a5b6ff9c-a3b0-4069-a135-9286fd9814e8.rna_seq.augmented_star_gene_counts.tsv	4251070	4d99cb7a9993424fb26a474cf1c49e9d	NFE2L2
	TCGA-56-A4ZJ	TCGA-56-A4ZJ-01A	TCGA-56-A4ZJ-01A-11R-A262-07	LUSC	female	6fb6e0b6-d575-470b-aa14-7e49c26a36c8	7d4baef8-a10b-49c5-b476-9755cf51a1f2.rna_seq.augmented_star_gene_counts.tsv	4245477	c390adaa7f03580a587f29a035c0604a	NO_NFE2L2
	TCGA-56-A4ZK	TCGA-56-A4ZK-01A	TCGA-56-A4ZK-01A-11R-A262-07	LUSC	female	9f5a8a33-5ac2-4b29-b33b-8ed0c2750d24	d5fc4ed3-40f0-4a31-bfe6-aac89545b4e5.rna_seq.augmented_star_gene_counts.tsv	4246430	0ea111919c6e302de62f9a40b0ce0f63	NO_NFE2L2
	TCGA-56-A5DR	TCGA-56-A5DR-01A	TCGA-56-A5DR-01A-11R-A27Q-07	LUSC	male	f81cd722-db09-40ee-9ac1-a0571f43dc30	a2f19b0e-eeab-47ef-aa22-61c779b9a075.rna_seq.augmented_star_gene_counts.tsv	4235475	c41293371099c89c5302ee842556a511	NO_NFE2L2
	TCGA-56-A5DS	TCGA-56-A5DS-01A	TCGA-56-A5DS-01A-11R-A27Q-07	LUSC	female	2561a166-42c2-4136-b353-a428211ea84b	b734515f-18ac-4a4b-8272-dc54d8d945a4.rna_seq.augmented_star_gene_counts.tsv	4244790	10a268368122cc9a1e6ebb767b5e0cde	NO_NFE2L2
	TCGA-56-A62T	TCGA-56-A62T-01A	TCGA-56-A62T-01A-11R-A405-07	LUSC	male	dc26c8dc-9cb5-489f-9138-f748faa3b3f5	7d4a0fea-feea-493a-ba6e-e78d99ee0590.rna_seq.augmented_star_gene_counts.tsv	4248174	244156cae2337d4346c7a4c0449dd37e	KEAP1
	TCGA-58-8386	TCGA-58-8386-01A	TCGA-58-8386-01A-11R-2296-07	LUSC	male	c2cdff0a-7852-47e3-b222-c51289e9d305	c16c7ee3-9527-485c-83da-91d4a773ccaf.rna_seq.augmented_star_gene_counts.tsv	4245594	a56b09d1203675759a7dc65eb121a759	NO_NFE2L2
	TCGA-58-8387	TCGA-58-8387-01A	TCGA-58-8387-01A-11R-2296-07	LUSC	male	383470fe-2f7b-4ee7-aa59-f8238df585f7	eaa2f4ac-783a-472f-a3f9-b385ff854c1c.rna_seq.augmented_star_gene_counts.tsv	4221768	e3fcc2ac4fee5b6dbefe855fe9b0248e	NO_NFE2L2
	TCGA-58-8388	TCGA-58-8388-01A	TCGA-58-8388-01A-11R-2326-07	LUSC	male	06ca30ec-156b-4f5e-9466-4563296a589d	e8fbb9e4-a42d-4bfe-8001-31505fc33a4e.rna_seq.augmented_star_gene_counts.tsv	4245616	9254d03be3f3d8fab02a17a0f82245ad	NO_NFE2L2
	TCGA-58-8390	TCGA-58-8390-01A	TCGA-58-8390-01A-11R-2326-07	LUSC	male	c6070343-86cb-4c71-8984-e8e5a2fd96f8	4a3427c8-30a8-4405-9535-58df503a2af0.rna_seq.augmented_star_gene_counts.tsv	4243189	7076bcb138a5d0180dacc76256e62626	NO_NFE2L2
	TCGA-58-8391	TCGA-58-8391-01A	TCGA-58-8391-01A-11R-2326-07	LUSC	female	3664ec56-3c20-47ab-ba37-e6a02e24af1d	ff757488-940a-461a-999f-cefe4e19fc08.rna_seq.augmented_star_gene_counts.tsv	4232918	9b9f90c12a1e82d65ed5c8d322cac5b5	NO_NFE2L2
	TCGA-58-8392	TCGA-58-8392-01A	TCGA-58-8392-01A-11R-2326-07	LUSC	male	fd2c6ba0-66fc-4406-aaf3-ef151682de0b	f13e95d9-dca8-4a22-ab0e-1d01e69a995f.rna_seq.augmented_star_gene_counts.tsv	4244677	c691dedadeb3bde97e590b263d211859	NO_NFE2L2
	TCGA-58-8393	TCGA-58-8393-01A	TCGA-58-8393-01A-11R-2326-07	LUSC	female	2d135613-d5e9-41c8-af31-8c6ffe073f58	96403ed2-56f1-4400-9b71-38364e579bae.rna_seq.augmented_star_gene_counts.tsv	4242245	17ee7391b92abf548cc1c707ce30cba3	NO_NFE2L2
	TCGA-58-A46J	TCGA-58-A46J-01A	TCGA-58-A46J-01A-11R-A24H-07	LUSC	male	7d6fc752-ce68-4605-bd57-6f76c102e59b	c347ccf4-bfa9-4830-9c9d-4fed47beba90.rna_seq.augmented_star_gene_counts.tsv	4247825	898aff394a7d9798017a0537e0105480	NO_NFE2L2
	TCGA-58-A46K	TCGA-58-A46K-01A	TCGA-58-A46K-01A-11R-A24H-07	LUSC	male	c56f402d-27b5-4d06-9086-b46272d9fe36	c0676fc2-639f-4e35-8ebe-64fff6c9e38f.rna_seq.augmented_star_gene_counts.tsv	4230446	4b88481be4cdbef0aa06d813e2a50cb8	NFE2L2
	TCGA-58-A46L	TCGA-58-A46L-01A	TCGA-58-A46L-01A-11R-A24H-07	LUSC	male	81e567b8-f914-4714-917d-df7d79d1b406	29066057-9b77-4c6a-832d-6a9fbc7e26dd.rna_seq.augmented_star_gene_counts.tsv	4272059	de5be8d2b82c01dbce3f68a0dcce4b67	NO_NFE2L2
	TCGA-58-A46M	TCGA-58-A46M-01A	TCGA-58-A46M-01A-11R-A24H-07	LUSC	male	b9839f31-8926-4fa3-9aae-bf15ee58e847	6ee211fb-528c-4c24-a197-62967c795eb4.rna_seq.augmented_star_gene_counts.tsv	4244468	41faf428459b6e34e897c9cd1751e9f9	KEAP1
	TCGA-58-A46N	TCGA-58-A46N-01A	TCGA-58-A46N-01A-11R-A24H-07	LUSC	male	4ca257ea-95ef-4881-8ab5-cd3ee88dbb6d	a60d117e-875a-4e40-a39a-b93be0a42a41.rna_seq.augmented_star_gene_counts.tsv	4234833	9b8a0c118b3e359dfd072d96f15fa60b	NO_NFE2L2
	TCGA-60-2695	TCGA-60-2695-01A	TCGA-60-2695-01A-01R-0851-07	LUSC	female	7da3a15e-9911-4429-98e7-d7ee03d7ad7f	ef697db7-3b14-4999-9e9b-85c37718f615.rna_seq.augmented_star_gene_counts.tsv	4256739	ef244a85ec4a69cfd95bfb356d65d1a9	NO_NFE2L2
X	TCGA-60-2696	TCGA-60-2696-01A	TCGA-60-2696-01A-01R-0851-07	LUSC	female	6ed3a19f-af35-42c0-8961-3e228abc6b7f	e74f770a-80b5-425e-b26a-bbfa29913773.rna_seq.augmented_star_gene_counts.tsv	4240567	8cb891ad4237cbd6868e0eca97621f89		No mutation data
	TCGA-60-2697	TCGA-60-2697-01A	TCGA-60-2697-01A-11R-2125-07	LUSC	male	48d7da30-c7d4-4dfa-aab4-0f9a0fdc05af	21c03d47-8b62-4b3f-b739-16b5e76b2cf5.rna_seq.augmented_star_gene_counts.tsv	4251282	4dd4d720c3ae6138bf5239222ced5e6e	NO_NFE2L2
	TCGA-60-2698	TCGA-60-2698-01A	TCGA-60-2698-01A-01R-0851-07	LUSC	male	45c6656d-a8f3-4968-aa40-142f3a340dde	ec765dd2-6541-4cdc-a26c-6d116398dc87.rna_seq.augmented_star_gene_counts.tsv	4251335	88aa21bcc2f65eda1cef2efe72a40597	CUL3
	TCGA-60-2703	TCGA-60-2703-01A	TCGA-60-2703-01A-11R-2045-07	LUSC	male	456f3881-1c66-432a-87b1-9e8a967088b7	cc6afa2d-449a-46eb-b532-2571ab63838d.rna_seq.augmented_star_gene_counts.tsv	4228027	bd4cfdebdd7938be36ed05561858902b	NO_NFE2L2
	TCGA-60-2704	TCGA-60-2704-01A	TCGA-60-2704-01A-11R-2045-07	LUSC	male	e4864765-ea64-404a-8892-2bbe22684521	5ca741b4-7222-4413-8b8d-eefed93fa002.rna_seq.augmented_star_gene_counts.tsv	4254709	cea724d13c7ba7558d797e3b830fc7f5	NO_NFE2L2
	TCGA-60-2706	TCGA-60-2706-01A	TCGA-60-2706-01A-01R-0851-07	LUSC	male	238a0f2f-8700-40e8-9ce4-4fc98d6f2b64	4e42b890-26e2-4742-ad04-663e7fbc66fa.rna_seq.augmented_star_gene_counts.tsv	4246508	a2db20ffb5cb57e07f24346fed12ce64	NO_NFE2L2
	TCGA-60-2707	TCGA-60-2707-01A	TCGA-60-2707-01A-01R-0851-07	LUSC	male	b61b2540-0b0a-47ba-9226-8f3ce67b127a	a0c7880e-b483-44fd-a090-c728df11d159.rna_seq.augmented_star_gene_counts.tsv	4241271	4550c12ea4b2d657b31c71d663eea8bb	NO_NFE2L2
	TCGA-60-2708	TCGA-60-2708-01A	TCGA-60-2708-01A-01R-0851-07	LUSC	female	77639238-e075-4b01-aa44-c248ad2b05e7	5acfee78-ced1-4fd5-955c-fe335d455294.rna_seq.augmented_star_gene_counts.tsv	4237708	89435477613f8084af28a2c8955e9615	NO_NFE2L2
	TCGA-60-2709	TCGA-60-2709-01A	TCGA-60-2709-01A-21R-1820-07	LUSC	male	0b91d17d-de8c-495e-b094-e571111b1e03	cabdc79a-8efe-4ddc-a256-854f9265bcda.rna_seq.augmented_star_gene_counts.tsv	4249285	7c934a4691f957a4a17b4232265034a3	NFE2L2
	TCGA-60-2710	TCGA-60-2710-01A	TCGA-60-2710-01A-01R-0851-07	LUSC	female	78af8cfb-23d2-442d-8439-f1862906f3e2	e43c19e5-5e82-48f0-87dc-f817182ed519.rna_seq.augmented_star_gene_counts.tsv	4250239	4a9d52bed12b490f0aace499fa5ec362	KEAP1
	TCGA-60-2711	TCGA-60-2711-01A	TCGA-60-2711-01A-01R-0851-07	LUSC	female	0f6c6bd3-2f1c-4358-9ce0-00cbef1693bc	fdc57820-1370-4386-af1b-35dc4ed7f2d7.rna_seq.augmented_star_gene_counts.tsv	4250722	c468e350289793432c320435642db3de	NO_NFE2L2
X	TCGA-60-2712	TCGA-60-2712-01A	TCGA-60-2712-01A-01R-0851-07	LUSC	female	044d098e-c65f-4152-8939-3c315aed0073	80ca4c12-21e8-45d1-8820-537b99bce32d.rna_seq.augmented_star_gene_counts.tsv	4244762	6fbbdda6d163bd0a889c965a8ff2b41c		No mutation data
	TCGA-60-2713	TCGA-60-2713-01A	TCGA-60-2713-01A-01R-0851-07	LUSC	male	a51aca71-6bfd-4c02-86e2-cb8a1da7595d	0aca55d1-4133-487c-937b-c3e5462199c0.rna_seq.augmented_star_gene_counts.tsv	4259097	591f0d5710e4bdbfa11caef08a6277b9	NO_NFE2L2
	TCGA-60-2714	TCGA-60-2714-01A	TCGA-60-2714-01A-01R-0851-07	LUSC	female	c6bd1dd4-4966-4e53-aaf3-30da7d28491d	3dc5db8b-58cf-4e9f-8ed8-35203b61d452.rna_seq.augmented_star_gene_counts.tsv	4244782	a12800f15e61c615ffe7affdf18a11b5	CUL3
X	TCGA-60-2715	TCGA-60-2715-01A	TCGA-60-2715-01A-01R-0851-07	LUSC	male	09152b74-f690-4dbc-a398-1f8dde28ec06	868bc289-3c43-4a0f-bbb1-703f0e9fa33a.rna_seq.augmented_star_gene_counts.tsv	4261356	51be60d63f848fcba03454f8a9f7e4e9		No mutation data
	TCGA-60-2716	TCGA-60-2716-01A	TCGA-60-2716-01A-01R-0851-07	LUSC	male	147111bd-92d8-4ec5-aa9d-66a27dab8d4a	c0d8873d-6669-4129-98d0-8b17d8c330d1.rna_seq.augmented_star_gene_counts.tsv	4246957	eda448955a27095a3a7de6a2691bbe46	NO_NFE2L2
	TCGA-60-2719	TCGA-60-2719-01A	TCGA-60-2719-01A-01R-0851-07	LUSC	female	51b77f56-8fbe-461f-8bfa-e27442045ea6	bfd1b561-68e5-43a7-9c29-4c6f47bfbfb1.rna_seq.augmented_star_gene_counts.tsv	4252410	a20f98fe76ce7f97f645c0552ab7ec9e	NO_NFE2L2
	TCGA-60-2720	TCGA-60-2720-01A	TCGA-60-2720-01A-01R-0851-07	LUSC	female	1a8fa56b-deaf-48ac-958c-46b5c86cdb80	7cb4456f-ceb8-4251-93a5-5e4af32c3809.rna_seq.augmented_star_gene_counts.tsv	4229427	b455e7e98e776020dc58548e8cd5441e	NO_NFE2L2
	TCGA-60-2721	TCGA-60-2721-01A	TCGA-60-2721-01A-01R-0851-07	LUSC	male	db225ac9-c998-42ad-9181-a075ec0f7c47	85b2ba06-6bdb-478f-b0ec-f048d08e564d.rna_seq.augmented_star_gene_counts.tsv	4251679	a25feab17ac3d1b838ace6747d05073e	NO_NFE2L2
	TCGA-60-2722	TCGA-60-2722-01A	TCGA-60-2722-01A-01R-0851-07	LUSC	male	cd03b494-38bf-4b7d-86a5-672acd7d0125	2fabdcab-7464-43ed-9cba-0f79b3bb66dc.rna_seq.augmented_star_gene_counts.tsv	4242044	f90d3c18ef20a41d369042d985d1bd31	KEAP1
	TCGA-60-2723	TCGA-60-2723-01A	TCGA-60-2723-01A-01R-0851-07	LUSC	female	e1177e7d-4621-475a-a48f-33e833a4dfbb	01f19270-5df9-42c5-a29b-9623486d2441.rna_seq.augmented_star_gene_counts.tsv	4238254	511fd0ca3066a8b79972ab3dcf7a4422	KEAP1
	TCGA-60-2724	TCGA-60-2724-01A	TCGA-60-2724-01A-01R-0851-07	LUSC	male	f15dc2b8-c1e3-4e27-8245-c4706baa8517	b666be40-4027-417f-81ed-6315b961cd98.rna_seq.augmented_star_gene_counts.tsv	4244542	7aec15adcde12071651d4d0a754e8fd0	NO_NFE2L2
	TCGA-60-2725	TCGA-60-2725-01A	TCGA-60-2725-01A-01R-1201-07	LUSC	male	c7574a06-b8b5-4f6b-a207-c8070d3e442e	8d94fc29-4c7f-4c6c-b28c-916893567907.rna_seq.augmented_star_gene_counts.tsv	4243977	56a87007c0c3da99c1758ff53587e857	NO_NFE2L2
	TCGA-60-2726	TCGA-60-2726-01A	TCGA-60-2726-01A-01R-0851-07	LUSC	male	8af8a3a5-8f98-4e93-abf5-bb401716bbed	aea2f863-1b45-404f-9a46-afb85ff47f02.rna_seq.augmented_star_gene_counts.tsv	4248603	a76344479c2e1e4294c53949e761fb39	NO_NFE2L2
	TCGA-63-5128	TCGA-63-5128-01A	TCGA-63-5128-01A-01R-1443-07	LUSC	male	12d419ee-1f41-40c1-9c75-03fded456055	686c4b05-6c38-4246-b069-246feb088d5a.rna_seq.augmented_star_gene_counts.tsv	4233577	0dd27bc7a1ef9f8cb372b1fb7fbce0f6	NO_NFE2L2
	TCGA-63-5131	TCGA-63-5131-01A	TCGA-63-5131-01A-01R-1443-07	LUSC	male	5c245ac1-a5d7-4c07-8b74-fafba8fc9e5d	8c0cab37-8256-4d01-bd3f-a888514986bc.rna_seq.augmented_star_gene_counts.tsv	4245526	ed0efb916c5cd95306453fd878cd47b1	NO_NFE2L2
	TCGA-63-6202	TCGA-63-6202-01A	TCGA-63-6202-01A-11R-1820-07	LUSC	male	d89f60e5-23be-42ed-86ed-4ae80a6a1baa	515add64-0ee2-48cb-a5ce-fc26398a671e.rna_seq.augmented_star_gene_counts.tsv	4239471	f61c824020f9376003d81d2ff558f943	NO_NFE2L2
	TCGA-63-7020	TCGA-63-7020-01A	TCGA-63-7020-01A-11R-1949-07	LUSC	male	6bff99d4-8131-4e5f-8bc8-57bb4675d580	007e754d-e85c-4278-9183-382fbc61121f.rna_seq.augmented_star_gene_counts.tsv	4232331	bec0587f278b5eb75c7ab91c2a882779	NO_NFE2L2
	TCGA-63-7021	TCGA-63-7021-01A	TCGA-63-7021-01A-11R-1949-07	LUSC	male	19fb2e8f-1227-4388-b553-1fc39c26ed48	e8788eed-247a-4338-80f5-e648825de780.rna_seq.augmented_star_gene_counts.tsv	4234489	04959f0bd3b98538e4bf525c0724cde1	NO_NFE2L2
	TCGA-63-7022	TCGA-63-7022-01A	TCGA-63-7022-01A-11R-1949-07	LUSC	female	67a4e5b1-80d2-4258-974e-57c1dde303cb	eb249bdc-0ba7-4fcd-a1b2-75390102668a.rna_seq.augmented_star_gene_counts.tsv	4231634	b66ffbc37494ba8d85ab29282982ef45	NO_NFE2L2
	TCGA-63-7023	TCGA-63-7023-01A	TCGA-63-7023-01A-11R-1949-07	LUSC	male	df540788-5785-41f3-a43e-398aa9067664	776ed666-ea2e-4bfc-8304-6ed47efd2a73.rna_seq.augmented_star_gene_counts.tsv	4238625	187aac40cb2dbe9d513769056773d8a8	NO_NFE2L2
	TCGA-63-A5M9	TCGA-63-A5M9-01A	TCGA-63-A5M9-01A-11R-A26W-07	LUSC	female	3bc1adb4-ab96-4a37-8df8-8cf9f8689523	cbd11e4b-dccd-4881-aa6f-9c6bf2c0a213.rna_seq.augmented_star_gene_counts.tsv	4248714	224d4a5ec7d5503266a99a7d4c2fd2b8	KEAP1
	TCGA-63-A5MB	TCGA-63-A5MB-01A	TCGA-63-A5MB-01A-11R-A26W-07	LUSC	male	b4308fc4-3c4c-4eda-8e28-3aacf9f04bc0	fdce9f4e-2a2b-4f59-b8a8-32836db64ea5.rna_seq.augmented_star_gene_counts.tsv	4253478	2486b7eb76098a6a4c2a4e3e4980fb23	NFE2L2
	TCGA-63-A5MG	TCGA-63-A5MG-01A	TCGA-63-A5MG-01A-12R-A27Q-07	LUSC	male	d9865860-a4e5-481f-95e4-3592caf8e33e	12b4c027-7a90-4b09-90b4-b851ba8d667c.rna_seq.augmented_star_gene_counts.tsv	4234182	109ff81b7c20db7d0d0fb96b4e3c9b91	NO_NFE2L2
	TCGA-63-A5MH	TCGA-63-A5MH-01A	TCGA-63-A5MH-01A-12R-A27Q-07	LUSC	male	e177e706-936f-4fba-be45-ba53ca518daf	c3ae35b4-dbf4-46b4-8743-ef7291bbf56a.rna_seq.augmented_star_gene_counts.tsv	4238112	06d21722afcd1500ec9c73bbb2a594e4	NO_NFE2L2
	TCGA-63-A5MI	TCGA-63-A5MI-01A	TCGA-63-A5MI-01A-12R-A27Q-07	LUSC	male	5403fcdd-3011-4ec4-ab0d-7fbe0b49a927	66a96600-ab91-4fc8-9aa8-943a76b106b4.rna_seq.augmented_star_gene_counts.tsv	4236051	e31cd9483c174bf32a4d74b63f8acb4a	NO_NFE2L2
	TCGA-63-A5MJ	TCGA-63-A5MJ-01A	TCGA-63-A5MJ-01A-11R-A27Q-07	LUSC	male	f37c7314-1a66-4c2e-85b1-84adea5d1667	070d7c13-063a-4691-9df0-df0b3000eaf6.rna_seq.augmented_star_gene_counts.tsv	4248665	18d41779262633e0c80b74066f6f0fe9	NFE2L2
	TCGA-63-A5ML	TCGA-63-A5ML-01A	TCGA-63-A5ML-01A-31R-A27Q-07	LUSC	male	0d93aa2b-c0f1-495c-8c73-68719d0e8b4e	f766816f-972b-4932-9a07-815b18a1d376.rna_seq.augmented_star_gene_counts.tsv	4240414	ae3cf518abda1a9c92a82b20d35b3f94	NO_NFE2L2
	TCGA-63-A5MM	TCGA-63-A5MM-01A	TCGA-63-A5MM-01A-11R-A26W-07	LUSC	female	de7f2bf9-7cf5-4e97-8c51-df5afd1b0246	aa1a59f9-7d12-4e76-a1ad-a6b2de62c4b0.rna_seq.augmented_star_gene_counts.tsv	4238548	8d1063ab79ea1d2dbaf7a43a7e8d1090	NO_NFE2L2
	TCGA-63-A5MN	TCGA-63-A5MN-01A	TCGA-63-A5MN-01A-22R-A27Q-07	LUSC	female	6050828b-0a01-44d5-993f-b9f7ef35a015	44c55465-02cd-4dca-8bc9-130d956ac143.rna_seq.augmented_star_gene_counts.tsv	4237698	08d4463d10e57dfef709e8af49aefa90	NO_NFE2L2
	TCGA-63-A5MP	TCGA-63-A5MP-01A	TCGA-63-A5MP-01A-11R-A26W-07	LUSC	male	918471a2-6d02-4e39-899e-f95077fb6593	4e07237d-2c58-412d-b8cf-8dcee0f52fdd.rna_seq.augmented_star_gene_counts.tsv	4264747	a33b031ce738262e07ef47e8d5cdb9f2	NO_NFE2L2
	TCGA-63-A5MR	TCGA-63-A5MR-01A	TCGA-63-A5MR-01A-31R-A27Q-07	LUSC	female	ca1ed3c2-6a69-4256-bc23-958599a70d45	3b944567-4d12-4cac-839f-31643a23b9fc.rna_seq.augmented_star_gene_counts.tsv	4238923	4fc63936ee64618e02f8432fbf0f9f74	NO_NFE2L2
	TCGA-63-A5MS	TCGA-63-A5MS-01A	TCGA-63-A5MS-01A-11R-A26W-07	LUSC	male	7b6781c7-4afb-4e53-a18d-c5ec1ca474bb	6ca7ab2a-bb36-4447-b749-ea050f6aacb2.rna_seq.augmented_star_gene_counts.tsv	4208824	d03abd33d24634a773458dd6e5b86c92	NO_NFE2L2
	TCGA-63-A5MT	TCGA-63-A5MT-01A	TCGA-63-A5MT-01A-21R-A26W-07	LUSC	male	543bccea-3c04-452f-aa0d-e978eb531c0e	023acc63-ca58-42f9-939c-3b22682dc7cc.rna_seq.augmented_star_gene_counts.tsv	4218950	c40da5791586887184ebea2395c1b14e	NO_NFE2L2
	TCGA-63-A5MU	TCGA-63-A5MU-01A	TCGA-63-A5MU-01A-11R-A26W-07	LUSC	male	90b9c230-9813-4c8e-b9e7-9018ccd21d28	af58596d-09fc-4190-a9db-62896c0dc494.rna_seq.augmented_star_gene_counts.tsv	4236303	39a5ec5a8af72e24927295542335251f	NO_NFE2L2
	TCGA-63-A5MV	TCGA-63-A5MV-01A	TCGA-63-A5MV-01A-21R-A26W-07	LUSC	male	81f72f24-60e5-4d8f-a4de-41ef4a652243	c5cef3b1-5e10-46cc-8e87-90fc037a0f8d.rna_seq.augmented_star_gene_counts.tsv	4252186	11ae3a0b0fb0858c34804699cc68fd9d	NO_NFE2L2
	TCGA-63-A5MW	TCGA-63-A5MW-01A	TCGA-63-A5MW-01A-11R-A26W-07	LUSC	male	e3a36a1b-fa5d-41e6-a84c-bf9e1ffa99c1	76b071e3-2bd0-4dde-9905-439237bffccd.rna_seq.augmented_star_gene_counts.tsv	4258546	cad094847ec69a8cac90f235f73ccea6	NO_NFE2L2
	TCGA-63-A5MY	TCGA-63-A5MY-01A	TCGA-63-A5MY-01A-11R-A26W-07	LUSC	male	37c3f067-219c-48ba-bff8-8917fd91446e	3b3f2b34-6be9-4bd1-88d9-82c081b0d7e3.rna_seq.augmented_star_gene_counts.tsv	4238886	cd6c095df95b1df92f702e98788a5201	NO_NFE2L2
	TCGA-66-2727	TCGA-66-2727-01A	TCGA-66-2727-01A-01R-0980-07	LUSC	female	95abf543-3987-4436-ba2a-a15e9c244d77	0ed46774-ff35-4335-9123-6e39bb29a13a.rna_seq.augmented_star_gene_counts.tsv	4242658	da2dd64c24f6b0a92404c118d8f34a87	NO_NFE2L2
	TCGA-66-2734	TCGA-66-2734-01A	TCGA-66-2734-01A-01R-0980-07	LUSC	female	edc9bf50-9542-433d-af38-283b4e77f17b	43c3a739-d8ba-42ef-b385-927a5f587d7b.rna_seq.augmented_star_gene_counts.tsv	4245537	f25864eb3feab734243830326dba2ffa	NO_NFE2L2
	TCGA-66-2737	TCGA-66-2737-01A	TCGA-66-2737-01A-01R-0980-07	LUSC	male	3bbd159a-d840-443f-9c57-060928bb51ef	fc991e3e-2254-4c4b-bf88-2115807b1801.rna_seq.augmented_star_gene_counts.tsv	4250388	06116328846477b9dc5c1ca6ee537a3b	NO_NFE2L2
	TCGA-66-2742	TCGA-66-2742-01A	TCGA-66-2742-01A-01R-0980-07	LUSC	male	f2ca8c10-3939-4792-abc4-e9547b33e1f7	2f9fc7f7-6290-41e5-b8c0-9776c5a81405.rna_seq.augmented_star_gene_counts.tsv	4240541	ea7ad950422e5fb09a3c4d7206d01a10	NO_NFE2L2
	TCGA-66-2744	TCGA-66-2744-01A	TCGA-66-2744-01A-01R-0980-07	LUSC	male	541ccd05-1933-4e8e-863f-e0145af65852	59b79577-34ef-47d4-afbf-4eddf8ff771b.rna_seq.augmented_star_gene_counts.tsv	4240524	c0f5d5b388f2afd5ce663d135c029873	NO_NFE2L2
	TCGA-66-2753	TCGA-66-2753-01A	TCGA-66-2753-01A-01R-0980-07	LUSC	male	7defae79-1d7b-4e15-b72b-393cf175da0e	c5008200-a047-47ea-a70d-ce7bb97106c8.rna_seq.augmented_star_gene_counts.tsv	4247112	02fc1dadc2eac645baff59fec5311f12	NO_NFE2L2
	TCGA-66-2754	TCGA-66-2754-01A	TCGA-66-2754-01A-01R-0980-07	LUSC	male	eff6c35a-c977-41f4-953a-eb20227991f4	db17dee6-bf23-4bf4-9061-9d6916953566.rna_seq.augmented_star_gene_counts.tsv	4238643	2a831a903137013912dd1c843e96db16	KEAP1
	TCGA-66-2755	TCGA-66-2755-01A	TCGA-66-2755-01A-01R-0851-07	LUSC	male	efae208a-2ce7-4cc4-9071-9192fcd6c668	099ea203-5488-41bd-a07d-c4b707faa375.rna_seq.augmented_star_gene_counts.tsv	4246733	bd48970fa511e369a98ca974845217c5	NO_NFE2L2
	TCGA-66-2756	TCGA-66-2756-01A	TCGA-66-2756-01A-01R-0851-07	LUSC	male	7d832824-0767-4801-b8bb-4ac0a231511f	88b5b2e0-8964-430c-b8cc-a073bc16810e.rna_seq.augmented_star_gene_counts.tsv	4247216	5fdc790967598a4425e70e1baa5dcc57	KEAP1
	TCGA-66-2757	TCGA-66-2757-01A	TCGA-66-2757-01A-01R-0851-07	LUSC	female	3ec3b960-96ef-44d1-8e76-0c54124f24e8	ac25f42b-5fcc-42eb-a3be-4d6d5a3e6d62.rna_seq.augmented_star_gene_counts.tsv	4247005	913368876de6b0410b87bd62892b0c63	NO_NFE2L2
	TCGA-66-2758	TCGA-66-2758-01A	TCGA-66-2758-01A-02R-0851-07	LUSC	male	dacb9396-4037-4313-bebc-074ffeab0d29	cc084786-60fc-4e72-9ee4-655483cdb07a.rna_seq.augmented_star_gene_counts.tsv	4248090	42cb6b92d13318b102572ff1e3bacf56	NO_NFE2L2
	TCGA-66-2759	TCGA-66-2759-01A	TCGA-66-2759-01A-01R-0851-07	LUSC	male	78ef6ada-3aa8-40fa-9bd6-c491dd31f96d	c7bce089-2c8a-4715-9e68-7935acea387d.rna_seq.augmented_star_gene_counts.tsv	4244231	252cea3a1d51f849f0a297d08aa779d5	NO_NFE2L2
	TCGA-66-2763	TCGA-66-2763-01A	TCGA-66-2763-01A-01R-0851-07	LUSC	female	3b38f2f6-1dc9-415f-ba13-54ecbaa82235	96f0d70a-212f-45f5-a997-b392bea009cb.rna_seq.augmented_star_gene_counts.tsv	4252725	5a2a867f3c526917261b86f4c75c3253	NO_NFE2L2
	TCGA-66-2765	TCGA-66-2765-01A	TCGA-66-2765-01A-01R-0851-07	LUSC	male	a1b28726-ff2b-4a60-a48a-6e4ce62fa853	1b0ce868-c996-4684-8385-a6db580c75f5.rna_seq.augmented_star_gene_counts.tsv	4236502	7603c2c8ada848a7b7790dc5db302eb1	NO_NFE2L2
	TCGA-66-2766	TCGA-66-2766-01A	TCGA-66-2766-01A-01R-0851-07	LUSC	male	f9cd1c16-3be3-415c-8d7b-9249c3b1c7fa	1a4e4c95-9614-445d-bc02-e0855ccbde11.rna_seq.augmented_star_gene_counts.tsv	4242841	1c6c53e29bd55bc3ca7f8d0e55ca8ca9	NFE2L2
	TCGA-66-2767	TCGA-66-2767-01A	TCGA-66-2767-01A-01R-0851-07	LUSC	male	b5feeedd-4ceb-427e-af82-dc206f05c68b	0b4c9b3f-fb3b-459e-a434-51a3081c8646.rna_seq.augmented_star_gene_counts.tsv	4253579	77a32676aadf65414f889b01254223d3	NO_NFE2L2
	TCGA-66-2768	TCGA-66-2768-01A	TCGA-66-2768-01A-01R-0851-07	LUSC	male	be995b73-a465-40c5-82fd-4ef0f8dcce28	8fc6eee8-3ec1-4f6c-a07b-f539ef9cad39.rna_seq.augmented_star_gene_counts.tsv	4251851	a86b7abfec690268ef8a228228362537	NO_NFE2L2
	TCGA-66-2769	TCGA-66-2769-01A	TCGA-66-2769-01A-02R-0851-07	LUSC	male	1f149435-3964-491d-b192-ac277408384a	bef06091-4b41-44e3-867f-5234f9cc5c49.rna_seq.augmented_star_gene_counts.tsv	4243751	14419bd7e774ed5136b8048b97b27ebc	NO_NFE2L2
	TCGA-66-2770	TCGA-66-2770-01A	TCGA-66-2770-01A-01R-0851-07	LUSC	male	d30a480e-39a4-42e6-922b-c5cda6826687	b0cd445b-e669-4047-8ed5-79824be3938b.rna_seq.augmented_star_gene_counts.tsv	4256678	145fd9959941697ac442e92e4bc4358e	NFE2L2
	TCGA-66-2771	TCGA-66-2771-01A	TCGA-66-2771-01A-01R-0980-07	LUSC	male	9f5d177b-cf6e-4d5c-869d-845c8aa6fb73	ff06afdf-d79c-4f6b-a8ea-ef81b478bea7.rna_seq.augmented_star_gene_counts.tsv	4233578	5713c968417e687923ae3719b6a30513	NO_NFE2L2
	TCGA-66-2773	TCGA-66-2773-01A	TCGA-66-2773-01A-01R-1201-07	LUSC	male	c64da734-41f3-4863-90a8-dc9871b7ae02	441b25ca-6ee0-4404-961a-be70c12546a8.rna_seq.augmented_star_gene_counts.tsv	4244645	3dd8e017e75c45432c6a04b7c8fbc2e5	KEAP1
	TCGA-66-2777	TCGA-66-2777-01A	TCGA-66-2777-01A-01R-1201-07	LUSC	male	ab355a1f-46ca-43c6-a125-9a9bd55fea4f	329bb593-6a8e-4df8-837f-639279f2abf1.rna_seq.augmented_star_gene_counts.tsv	4243668	ae8907e451abb8e6180c50b91462a8a9	KEAP1
	TCGA-66-2778	TCGA-66-2778-01A	TCGA-66-2778-01A-02R-0851-07	LUSC	female	6e6328d3-251d-4b16-8990-2b43623a99c5	8bf414c0-2db5-414c-b5f2-f3f6a5ce667e.rna_seq.augmented_star_gene_counts.tsv	4234165	686e8bd9381aae0d8014249e75df9a01	NO_NFE2L2
	TCGA-66-2780	TCGA-66-2780-01A	TCGA-66-2780-01A-01R-0851-07	LUSC	male	a8c8cbc5-e771-4ba5-b53f-00b53cd032fd	6798d95c-91be-43f9-88a1-41978d4a41c5.rna_seq.augmented_star_gene_counts.tsv	4242291	0bcbdb256088f2f2aaa2b31068918996	NO_NFE2L2
	TCGA-66-2781	TCGA-66-2781-01A	TCGA-66-2781-01A-01R-0851-07	LUSC	male	74762046-1558-44bd-aa87-57dddc47c749	59fd6a72-d96d-42af-8013-11f43af6eed5.rna_seq.augmented_star_gene_counts.tsv	4252644	b8577a2bbb6d2cf768a97e6094ca6812	NO_NFE2L2
	TCGA-66-2782	TCGA-66-2782-01A	TCGA-66-2782-01A-01R-0851-07	LUSC	male	26b89c7e-5fef-470d-a906-e383065b7a04	576e6d35-680d-46c3-bfc6-1ec3121da777.rna_seq.augmented_star_gene_counts.tsv	4249877	f81f1a166d4f5958c6b3f1aa6fef2039	NO_NFE2L2
	TCGA-66-2783	TCGA-66-2783-01A	TCGA-66-2783-01A-01R-1201-07	LUSC	male	c8a68cbe-87a1-44b3-bf4b-68ba0de91994	3c174eac-9153-4c66-8da4-969925c2c4c4.rna_seq.augmented_star_gene_counts.tsv	4230603	d78b8515cb3a3fb542e8b3cce866e81a	NFE2L2
	TCGA-66-2785	TCGA-66-2785-01A	TCGA-66-2785-01A-01R-0851-07	LUSC	male	72f1c7d8-ed9b-4d97-abaa-5c4d6478542f	b5356a8b-9401-442f-a5dd-7e9273723a67.rna_seq.augmented_star_gene_counts.tsv	4243255	1220bb3de7c8c2415e8176197a7e28b8	CUL3
	TCGA-66-2786	TCGA-66-2786-01A	TCGA-66-2786-01A-01R-0851-07	LUSC	female	f46bcec5-9dfe-4c91-a789-5e3c6bf878db	ce8c79f1-aebf-4824-aa7a-5eb528c7015a.rna_seq.augmented_star_gene_counts.tsv	4249198	b47105106b48e6870c347a2f4eb29e26	NO_NFE2L2
	TCGA-66-2787	TCGA-66-2787-01A	TCGA-66-2787-01A-01R-0980-07	LUSC	male	5d4bca16-38fc-41c9-97c3-cab4c6e07cf2	3169371f-5fd0-40b5-838e-9c57dded9137.rna_seq.augmented_star_gene_counts.tsv	4241726	f53173fd81818d24430aa43ef8732efc	NFE2L2
	TCGA-66-2788	TCGA-66-2788-01A	TCGA-66-2788-01A-01R-0980-07	LUSC	male	42afded2-aa23-4f7f-b86f-ac47b324db1d	fbf226a9-b07a-4aa2-bcb6-ceaac4b373c0.rna_seq.augmented_star_gene_counts.tsv	4247755	a4da8e5f43def256c7bad034aa6ffa84	NO_NFE2L2
	TCGA-66-2789	TCGA-66-2789-01A	TCGA-66-2789-01A-01R-0980-07	LUSC	male	9d3f54d7-901f-4861-b015-21d011a40869	a4c0b47f-515a-4578-a6d3-fbf447c5f107.rna_seq.augmented_star_gene_counts.tsv	4252620	931bb3de0b231909b8a060995ce53621	NO_NFE2L2
	TCGA-66-2790	TCGA-66-2790-01A	TCGA-66-2790-01A-01R-0980-07	LUSC	male	8b127afe-679e-4ec3-9146-daa98d3ce047	1a4919a4-a2d3-4755-b681-c00ff22b2cfb.rna_seq.augmented_star_gene_counts.tsv	4261845	2e075b389f0d280d1af50b633f54740e	NO_NFE2L2
	TCGA-66-2791	TCGA-66-2791-01A	TCGA-66-2791-01A-01R-0980-07	LUSC	male	d3304c77-bc34-420b-8400-db4a2195bc71	fcc330dd-5ebe-4b5e-9bb7-00e8fe19232c.rna_seq.augmented_star_gene_counts.tsv	4247840	10f1f4f1c45e9deed99adea1323b8dde	NO_NFE2L2
	TCGA-66-2792	TCGA-66-2792-01A	TCGA-66-2792-01A-01R-0980-07	LUSC	male	d732f454-65c9-43ad-9dcb-584b47fa4ae5	4632e964-270b-4ff4-9d94-38837d8b92da.rna_seq.augmented_star_gene_counts.tsv	4246506	b47d80d968b5973741331b21ced70cd6	NO_NFE2L2
	TCGA-66-2793	TCGA-66-2793-01A	TCGA-66-2793-01A-01R-1201-07	LUSC	male	a94794ac-2691-4a8a-8329-c5aae6669d16	c3878bd6-8b79-422b-9512-0fe3a9df83e7.rna_seq.augmented_star_gene_counts.tsv	4240948	7ba78f18c4ffe3dcf4de725df033cbc3	NO_NFE2L2
	TCGA-66-2794	TCGA-66-2794-01A	TCGA-66-2794-01A-01R-1201-07	LUSC	male	c5cdf98d-fb4e-4869-9e86-259a497b904e	9f051fa2-2cc7-433a-b8b4-5829a51e9a65.rna_seq.augmented_star_gene_counts.tsv	4235653	05cf6d618e96ffda31b58e7d916c6e57	NO_NFE2L2
	TCGA-66-2795	TCGA-66-2795-01A	TCGA-66-2795-01A-02R-0980-07	LUSC	male	5c3ec03d-d9eb-48e8-b132-5733dcf83131	5332a617-f178-4197-8ed4-2f49bf8751e0.rna_seq.augmented_star_gene_counts.tsv	4230393	72827c1770b1fa68775d7995cfcbebe7	NO_NFE2L2
	TCGA-66-2800	TCGA-66-2800-01A	TCGA-66-2800-01A-01R-1201-07	LUSC	male	e890955f-3a56-4ce0-a744-747b49c5b4cb	56b5f041-5a1b-4823-ad3b-c7f80e9d8f20.rna_seq.augmented_star_gene_counts.tsv	4244807	4954e5e56f4e7ddab8bd5621c6262906	CUL3
	TCGA-68-7755	TCGA-68-7755-01A	TCGA-68-7755-01A-11R-2125-07	LUSC	female	6bdd52ac-51c5-4f43-bf2c-95ee11367727	c5359233-1bc7-4d7d-893a-1114cb6a38ad.rna_seq.augmented_star_gene_counts.tsv	4245178	c04ee32d23b06bb3846693bd2fce01d5	NO_NFE2L2
	TCGA-68-7756	TCGA-68-7756-01A	TCGA-68-7756-01A-11R-2125-07	LUSC	male	3f734a27-3086-492f-9e13-eab18d41fed3	f2b407a3-4675-424d-beba-b7177a5df748.rna_seq.augmented_star_gene_counts.tsv	4248296	2fa3413134498b382c5d293ebde54b36	NFE2L2
	TCGA-68-7757	TCGA-68-7757-01B	TCGA-68-7757-01B-11R-2296-07	LUSC	male	586ef291-7051-40be-80a1-8049e5433202	ae3a62aa-c484-4ab2-999d-911179fbfd4d.rna_seq.augmented_star_gene_counts.tsv	4237885	0b408ba16870e7e6982e5efb6b19d1e7	NO_NFE2L2
	TCGA-68-8250	TCGA-68-8250-01A	TCGA-68-8250-01A-11R-2296-07	LUSC	male	7909042c-47f9-4f3a-9591-71f8856a571d	0648c653-891f-4202-8d83-59be8fc5e80c.rna_seq.augmented_star_gene_counts.tsv	4243442	837dbf379bbfa54941e83513e4a44f91	NO_NFE2L2
	TCGA-68-8251	TCGA-68-8251-01A	TCGA-68-8251-01A-11R-2296-07	LUSC	male	4881f536-790c-4c1c-9c19-d1c00057664f	c45b709b-951c-4382-9e91-0d38c7bc559f.rna_seq.augmented_star_gene_counts.tsv	4243272	0a49492c4c13bae26ed9838aa90d0c74	NO_NFE2L2
	TCGA-68-A59I	TCGA-68-A59I-01A	TCGA-68-A59I-01A-11R-A262-07	LUSC	female	14350006-3c6f-4079-8a35-afd1e5f8a29a	201a8762-54e6-49a1-a9c8-a6c442dcaf0a.rna_seq.augmented_star_gene_counts.tsv	4247090	9f980154339d7e94c5e5eb642ff12593	NO_NFE2L2
	TCGA-68-A59J	TCGA-68-A59J-01A	TCGA-68-A59J-01A-21R-A26W-07	LUSC	female	8a2ada69-c4b1-4aab-998b-dbc4ddd350d0	347df8e1-adc6-4a0f-a1b2-e620d259b487.rna_seq.augmented_star_gene_counts.tsv	4250745	5ccc23e925d8e507b8a3a1b891f80f86	NFE2L2
	TCGA-6A-AB49	TCGA-6A-AB49-01A	TCGA-6A-AB49-01A-12R-A405-07	LUSC	female	a2ccff5d-4458-40a1-8522-153d12161b2e	8ba62a76-1dd5-4779-be0b-97949035b130.rna_seq.augmented_star_gene_counts.tsv	4241847	03d0d7fd177a2e0b9dfd7da760b728e4	NO_NFE2L2
	TCGA-70-6722	TCGA-70-6722-01A	TCGA-70-6722-01A-11R-1820-07	LUSC	male	ab646f7c-46a6-45a9-91ae-43f5d230b542	6f89146c-407c-4e31-94df-89c5c1b7d0af.rna_seq.augmented_star_gene_counts.tsv	4251585	de7fc523412dd59fee2b4d9f7168f962	NO_NFE2L2
	TCGA-70-6723	TCGA-70-6723-01A	TCGA-70-6723-01A-11R-1820-07	LUSC	male	2b600b63-198b-43af-844d-ca9629b8e508	7999ce36-cdcf-41a8-bde7-6f519e619857.rna_seq.augmented_star_gene_counts.tsv	4257469	a0c8adc8dbdc443f49afe88af419199b	NO_NFE2L2
	TCGA-77-6842	TCGA-77-6842-01A	TCGA-77-6842-01A-11R-1949-07	LUSC	male	dbb92362-c980-4746-b109-755c49db7be2	d19b1a80-9df4-48ab-8325-6daa140a35ab.rna_seq.augmented_star_gene_counts.tsv	4245318	cd4c316164c9a5f8b1f1c16ee51242e4	NO_NFE2L2
	TCGA-77-6843	TCGA-77-6843-01A	TCGA-77-6843-01A-11R-1949-07	LUSC	male	2b951c52-c888-4826-8114-c9ab09e5e7c5	0b646082-9e64-4fb2-a9c9-e283d4c49852.rna_seq.augmented_star_gene_counts.tsv	4241525	8c192336d262e3e424683d30024ac91b	NO_NFE2L2
	TCGA-77-6844	TCGA-77-6844-01A	TCGA-77-6844-01A-11R-1949-07	LUSC	male	fd1da1e9-1fef-4037-ba7e-e83e958f7834	5c6bb775-aaa5-4b5f-90be-86926549ae90.rna_seq.augmented_star_gene_counts.tsv	4251409	78d29d013d2eabed16b864d421cc8026	NO_NFE2L2
	TCGA-77-6845	TCGA-77-6845-01A	TCGA-77-6845-01A-11R-1949-07	LUSC	male	f1925d79-5dae-40b3-8699-6ea713cae738	7bb2bfee-eb7e-46c3-8aaa-1682d47dab06.rna_seq.augmented_star_gene_counts.tsv	4248045	bfefec9190565e8305d326172fb90de4	KEAP1
	TCGA-77-7138	TCGA-77-7138-01A	TCGA-77-7138-01A-41R-2045-07	LUSC	male	b7e3f944-1ed2-4d04-a2dc-bf6ff06b5db7	6b4f8e00-03a3-4f9f-b1ef-435b0417d665.rna_seq.augmented_star_gene_counts.tsv	4241128	e7f47a27caea80969d5f4b7225c1c0b9	NO_NFE2L2
	TCGA-77-7139	TCGA-77-7139-01A	TCGA-77-7139-01A-11R-2045-07	LUSC	male	1677f6e6-b177-4f08-9621-4f762c3a2e45	363f4a46-e1c5-4cf6-bfd7-101f7810530c.rna_seq.augmented_star_gene_counts.tsv	4245402	1ded759b17326821903369eb241471d1	NO_NFE2L2
	TCGA-77-7140	TCGA-77-7140-01A	TCGA-77-7140-01A-41R-2045-07	LUSC	female	d2b8708b-87ff-4ac9-878e-9072ba1d31dd	b6cbc920-9212-4a58-b109-8a57e394ef58.rna_seq.augmented_star_gene_counts.tsv	4235745	ce89fad331aca47e4f267a683812db3c	NO_NFE2L2
	TCGA-77-7141	TCGA-77-7141-01A	TCGA-77-7141-01A-11R-2045-07	LUSC	male	0bfe52ec-dbe3-44e7-8c14-78391445537c	ab2da4c5-955f-4072-8021-6d2a617089db.rna_seq.augmented_star_gene_counts.tsv	4258790	c25f834ed1fef29d0daaf18340c5d2ae	NO_NFE2L2
	TCGA-77-7142	TCGA-77-7142-01A	TCGA-77-7142-01A-11R-2045-07	LUSC	female	6c254294-98e1-4df0-ae22-0c678095473c	03f9c75a-109a-4d53-b448-5fa5f294ce90.rna_seq.augmented_star_gene_counts.tsv	4247923	4059871c0713e800442ece1df9d90434	NO_NFE2L2
	TCGA-77-7335	TCGA-77-7335-01A	TCGA-77-7335-01A-11R-2045-07	LUSC	female	10cdb0af-b041-41fa-820e-8464a05cb20d	7e4e1851-367d-4517-bac5-d24d23397b2d.rna_seq.augmented_star_gene_counts.tsv	4224039	ad3544a556d258c1a51c30ab1fe26399	NO_NFE2L2
	TCGA-77-7337	TCGA-77-7337-01A	TCGA-77-7337-01A-21R-2045-07	LUSC	male	f19f38a0-9e3b-4d6d-be42-62671c5a7f63	410424bd-6229-4e58-b21e-e904b35900ff.rna_seq.augmented_star_gene_counts.tsv	4242011	b8d20fb29111d58a73f80b9cf7f1a377	NO_NFE2L2
	TCGA-77-7338	TCGA-77-7338-01A	TCGA-77-7338-01A-11R-2045-07	LUSC	male	af5402f0-30d1-4fab-9d41-3b25bc28fc20	b8e5af13-32e2-4f23-8ca5-78ffd5e20ef8.rna_seq.augmented_star_gene_counts.tsv	4246948	6f89573b6635b04ee449256299b823a4	KEAP1
	TCGA-77-7463	TCGA-77-7463-01A	TCGA-77-7463-01A-11R-2045-07	LUSC	male	7d18edd8-b68d-438c-92e8-be99699f58b3	9d8483ec-eb66-4055-b757-13ef0eb36c05.rna_seq.augmented_star_gene_counts.tsv	4237211	6dae2e152ff3555bd82d4ff6407beef8	CUL3
	TCGA-77-7465	TCGA-77-7465-01A	TCGA-77-7465-01A-11R-2045-07	LUSC	male	5db6d381-4369-4178-abee-2dea4a94f7aa	68111827-d5af-4d9c-beb2-e34678e73a62.rna_seq.augmented_star_gene_counts.tsv	4245991	b36e77e48c116370d49655ed1dd54d3a	NO_NFE2L2
	TCGA-77-8007	TCGA-77-8007-01A	TCGA-77-8007-01A-11R-2187-07	LUSC	male	86d50377-58c8-4653-8e0b-2fa840c10a3e	37b663a6-c5a4-4a4f-b082-ddb5d1c0caeb.rna_seq.augmented_star_gene_counts.tsv	4251250	5def426b0ae936bacd0f7a461ecc7626	NO_NFE2L2
	TCGA-77-8008	TCGA-77-8008-01A	TCGA-77-8008-01A-21R-2187-07	LUSC	male	1b4d3f57-64ce-4b42-b1e9-9704a1a658fa	3d6190d3-a73e-4682-a06f-368b657176c6.rna_seq.augmented_star_gene_counts.tsv	4250011	a5f1b550fe7a7a5f4b8be63f4f9f0059	NO_NFE2L2
	TCGA-77-8009	TCGA-77-8009-01A	TCGA-77-8009-01A-11R-2187-07	LUSC	male	b9719e93-b44f-4eb3-8fe9-14914e643d57	b1840b93-f4c6-4308-bcc4-63da00cd7e8b.rna_seq.augmented_star_gene_counts.tsv	4244652	21c293ac9aab9198213b4256e315ce66	KEAP1
	TCGA-77-8128	TCGA-77-8128-01A	TCGA-77-8128-01A-11R-2247-07	LUSC	male	d305b0b8-efa5-40f9-b4f9-7ff6557c3674	13ca4dfb-6bef-429f-9658-296bbdc1beb8.rna_seq.augmented_star_gene_counts.tsv	4239452	bda018e267f144b915af0a513806df49	NO_NFE2L2
	TCGA-77-8130	TCGA-77-8130-01A	TCGA-77-8130-01A-11R-2247-07	LUSC	male	0e480f18-0e72-444e-b7e1-956a439471ad	a21c0490-049b-4451-a714-89007edb62f5.rna_seq.augmented_star_gene_counts.tsv	4221130	d1c3182edd30ba92ad70fe402f711deb	NO_NFE2L2
	TCGA-77-8131	TCGA-77-8131-01A	TCGA-77-8131-01A-11R-2247-07	LUSC	male	8d0521db-a42b-433f-bb74-cbf8df6ba25d	3612019f-c69e-4dc3-b371-972173ae4ed9.rna_seq.augmented_star_gene_counts.tsv	4226771	7e72b75214f44fda5f295a49cc722e21	NO_NFE2L2
	TCGA-77-8133	TCGA-77-8133-01A	TCGA-77-8133-01A-12R-2247-07	LUSC	male	1de6bf50-8b9e-48ca-a396-3ca7e3ea0572	7701440f-17b4-47da-a070-d11afd94e9ae.rna_seq.augmented_star_gene_counts.tsv	4239341	64f99fbc4b3a00316c6edd25f38fba12	NO_NFE2L2
	TCGA-77-8136	TCGA-77-8136-01A	TCGA-77-8136-01A-11R-2247-07	LUSC	female	54dc4ad5-8f8d-4d78-a50b-8c2cf7eb2ea0	649e5ee8-e10c-4268-a1d7-77b38f5154ea.rna_seq.augmented_star_gene_counts.tsv	4231260	0326e24ab25179b51fe7d3ccf1ede190	NO_NFE2L2
	TCGA-77-8138	TCGA-77-8138-01A	TCGA-77-8138-01A-11R-2247-07	LUSC	male	b7632f5d-e8ec-4dfb-8431-e9151bf7b451	60b9a6fa-2d03-42d1-8d60-27cb55429b84.rna_seq.augmented_star_gene_counts.tsv	4226153	dbaa393ffea087df998c2a572c082ff0	NO_NFE2L2
	TCGA-77-8139	TCGA-77-8139-01A	TCGA-77-8139-01A-11R-2247-07	LUSC	male	a3a53248-6292-412e-be21-28d6f8dc9a74	1c4d1ab3-9e95-4a14-849b-b0a2ba2b32cf.rna_seq.augmented_star_gene_counts.tsv	4226177	af43ba8d5d93a343924115f916bb5499	NO_NFE2L2
	TCGA-77-8140	TCGA-77-8140-01A	TCGA-77-8140-01A-11R-2247-07	LUSC	female	8a64b8f7-68e8-49bf-9579-f15fe28b75dc	7d6dff55-eb14-47fa-9e09-c5980dde5f39.rna_seq.augmented_star_gene_counts.tsv	4222001	7edf81e3a01e682f5c1d05d7155ac7a4	NO_NFE2L2
	TCGA-77-8143	TCGA-77-8143-01A	TCGA-77-8143-01A-11R-2247-07	LUSC	male	c3ec70f4-dfe8-4524-9b4e-ba127a806470	9eb13db4-8267-4121-a74c-ff3b57a5e9ef.rna_seq.augmented_star_gene_counts.tsv	4231387	f685259770ed17cc1db1a9507c2ec4a2	NO_NFE2L2
	TCGA-77-8144	TCGA-77-8144-01A	TCGA-77-8144-01A-11R-2247-07	LUSC	male	8f5bb09d-e15a-4938-aad1-85c1b2d79af9	09bbf500-6e8c-4cb8-bc96-d7c09a43a041.rna_seq.augmented_star_gene_counts.tsv	4229099	956ccdfb0ec67ef80d992051de20f9bc	NO_NFE2L2
	TCGA-77-8145	TCGA-77-8145-01A	TCGA-77-8145-01A-11R-2247-07	LUSC	male	7d53b735-23db-4321-a2ec-76264f7c607f	3f169585-7c16-4935-bf5c-bb746abcef02.rna_seq.augmented_star_gene_counts.tsv	4221635	8b10aad9a42d2f76c672f6498d8b821a	NO_NFE2L2
X	TCGA-77-8146	TCGA-77-8146-01A	TCGA-77-8146-01A-11R-2247-07	LUSC	male	e95d92be-5170-46c5-884b-f88195d549ed	6df808d4-b660-463e-ab2d-cc31f173fce8.rna_seq.augmented_star_gene_counts.tsv	4214627	4b751a04a7180923a77d75172c72dc94		No mutation data
	TCGA-77-8148	TCGA-77-8148-01A	TCGA-77-8148-01A-11R-2247-07	LUSC	male	c2a485c5-f871-4337-acdd-63b365a9c8a1	24ccefdf-3ec9-4a4f-94c7-8fc273347686.rna_seq.augmented_star_gene_counts.tsv	4238137	639c61db1c3a4a1839e1a888ac96ee02	NO_NFE2L2
	TCGA-77-8150	TCGA-77-8150-01A	TCGA-77-8150-01A-11R-2247-07	LUSC	male	87db73f9-c9db-4797-b02e-28373c9b5bbb	1bd807e3-4eea-4a60-9df3-ca0d26fe5080.rna_seq.augmented_star_gene_counts.tsv	4208499	b959ab014dff7abf4720fa58297df542	CUL3
	TCGA-77-8153	TCGA-77-8153-01A	TCGA-77-8153-01A-11R-2403-07	LUSC	female	bc21ab3f-b9bb-4455-ba3b-24cb753672d6	509f3538-737d-473e-bbd7-bce8b06e3528.rna_seq.augmented_star_gene_counts.tsv	4233054	c4a0ddb3d78414612c7ed5eb8a8dfa10	KEAP1
	TCGA-77-8154	TCGA-77-8154-01A	TCGA-77-8154-01A-11R-2247-07	LUSC	male	7097d905-c693-4de3-bed7-0d3fdbbe3b37	54dfc3dc-4b60-4e85-ae78-0e1c2b14abeb.rna_seq.augmented_star_gene_counts.tsv	4227809	bc780ab7aa0da416964d7888bf9d13b3	NO_NFE2L2
	TCGA-77-8156	TCGA-77-8156-01A	TCGA-77-8156-01A-11R-2247-07	LUSC	male	2a037b6b-c2dc-4d7b-974c-77054355733f	3954717e-89b3-4dd0-997e-9fdde4dd4a40.rna_seq.augmented_star_gene_counts.tsv	4230888	ffb01267863462d790105ddd62b388c5	NO_NFE2L2
	TCGA-77-A5FZ	TCGA-77-A5FZ-01A	TCGA-77-A5FZ-01A-31R-A27Q-07	LUSC	male	0fe3bf01-415a-4945-8606-74b92ae9da44	d58fe5dc-9a75-42e7-94af-2ab20a21dab1.rna_seq.augmented_star_gene_counts.tsv	4235061	c629fa266a5bf5567c531884c8339292	NO_NFE2L2
	TCGA-77-A5G1	TCGA-77-A5G1-01A	TCGA-77-A5G1-01A-11R-A27Q-07	LUSC	male	b2b395be-bc12-416a-9ade-aa8194a84d28	f81dab30-a34a-4187-a196-fc972774cd75.rna_seq.augmented_star_gene_counts.tsv	4239252	14ab6e74f8cc22ff7b86f1e106dec8ee	NO_NFE2L2
	TCGA-77-A5G3	TCGA-77-A5G3-01A	TCGA-77-A5G3-01A-31R-A27Q-07	LUSC	male	77a13fe7-8524-41b6-b1b0-8f06d80f5cc4	2443dc79-7ec3-4066-b49e-6b1da38572a8.rna_seq.augmented_star_gene_counts.tsv	4246051	b2f47fbbe772bf1589592ad672056cbd	NO_NFE2L2
	TCGA-77-A5G6	TCGA-77-A5G6-01A	TCGA-77-A5G6-01A-11R-A27Q-07	LUSC	male	b1af869c-458d-43cb-aed9-f785a8b615b8	f84c095c-92ae-4448-994e-de023c348520.rna_seq.augmented_star_gene_counts.tsv	4237646	a9f11297f8bfd48e638acf43148cff06	NO_NFE2L2
	TCGA-77-A5G7	TCGA-77-A5G7-01B	TCGA-77-A5G7-01B-11R-A27Q-07	LUSC	male	253c806e-019c-4113-8b96-6cad516e225f	6ef57392-36ec-43e3-bef6-42e43f2f72cd.rna_seq.augmented_star_gene_counts.tsv	4228927	b0408b4664daea6f6ab24f5f3c7fca05	NO_NFE2L2
	TCGA-77-A5G8	TCGA-77-A5G8-01B	TCGA-77-A5G8-01B-11R-A27Q-07	LUSC	male	aea9f25d-825e-4e70-bef2-260b514b5f86	ac8931db-1d94-4301-952e-599717b5adf9.rna_seq.augmented_star_gene_counts.tsv	4223893	fc2d10c9a7ade8fb151a54789cb125cf	NO_NFE2L2
X	TCGA-77-A5GA	TCGA-77-A5GA-01A	TCGA-77-A5GA-01A-11R-A27Q-07	LUSC	male	eca32303-c94c-433e-bb9e-a299b33d83d1	a4b79cf8-f21a-42ae-bd00-528204d1e66d.rna_seq.augmented_star_gene_counts.tsv	4221828	3f859cee34c9c202a30a036eb70a9685		No mutation data
	TCGA-77-A5GB	TCGA-77-A5GB-01B	TCGA-77-A5GB-01B-11R-A27Q-07	LUSC	male	a0ef6550-f1d1-40e1-8fae-0fdede3f189e	d43517e2-e447-42cc-93e1-cbc9669ef4f1.rna_seq.augmented_star_gene_counts.tsv	4204770	db656a47372e316d9b4057305cb4772e	NO_NFE2L2
	TCGA-77-A5GF	TCGA-77-A5GF-01A	TCGA-77-A5GF-01A-21R-A27Q-07	LUSC	male	477a2b9e-22f2-47f8-9cc9-9e10f0eec04e	6a994238-296a-4047-a8d4-e2eed5dd7bfc.rna_seq.augmented_star_gene_counts.tsv	4218141	ab16716383ea692377002e58c01e13de	NFE2L2
	TCGA-77-A5GH	TCGA-77-A5GH-01A	TCGA-77-A5GH-01A-11R-A27Q-07	LUSC	male	90cf1bc5-1f8a-47b9-af32-12738b749817	5f69a28f-f424-4985-ae34-42a53d4803cc.rna_seq.augmented_star_gene_counts.tsv	4213356	914bf6b81d0fada27974909ab9507d9e	NO_NFE2L2
	TCGA-79-5596	TCGA-79-5596-01A	TCGA-79-5596-01A-31R-1949-07	LUSC	male	8f2bec2c-7a61-4749-bfb1-3c5dba953c8a	82fb3155-6bf4-4f39-99f4-dfee3a1a5078.rna_seq.augmented_star_gene_counts.tsv	4246804	1c2e9c5e99d2b20ce50d89562a91a262	NO_NFE2L2
	TCGA-85-6175	TCGA-85-6175-01A	TCGA-85-6175-01A-11R-1820-07	LUSC	female	8a88c897-62f2-4079-8029-804f7d782bb7	14fe30e1-ae34-490e-a9bc-16de4e7e240e.rna_seq.augmented_star_gene_counts.tsv	4257007	523ecd1c883bc45f676b00c1ebb0a829	NO_NFE2L2
	TCGA-85-6560	TCGA-85-6560-01A	TCGA-85-6560-01A-11R-1820-07	LUSC	male	a63881c9-00b2-4ec2-a190-cc59d9c2d780	df77483a-5756-4f48-87c6-8e45f765bdb7.rna_seq.augmented_star_gene_counts.tsv	4261945	5e6a0259e587c04b677b3da8350dfc45	NO_NFE2L2
	TCGA-85-6561	TCGA-85-6561-01A	TCGA-85-6561-01A-11R-1820-07	LUSC	male	db0b0468-4b6d-4d6c-a16e-0a28b5798ea9	6b267f00-73c0-4657-a61e-e552eef5b432.rna_seq.augmented_star_gene_counts.tsv	4254741	04cc91a25809f51f96c19936411c7a9b	CUL3_KEAP1
	TCGA-85-6798	TCGA-85-6798-01A	TCGA-85-6798-01A-11R-1949-07	LUSC	male	c105286e-08ac-4988-85d3-41d5d9f5fdf5	1d551553-e0fd-4008-ab18-93fbf77cf9b9.rna_seq.augmented_star_gene_counts.tsv	4233913	04a23a812439c0b3c8cb80c40ca69c87	NO_NFE2L2
	TCGA-85-7696	TCGA-85-7696-01A	TCGA-85-7696-01A-11R-2125-07	LUSC	male	425145f9-793b-4bc6-95cb-74352edee797	754a7a1e-3372-4c8a-b13b-b534cfe84968.rna_seq.augmented_star_gene_counts.tsv	4266360	bc7bce8272a8f93019cd1136bc46093c	NFE2L2
	TCGA-85-7697	TCGA-85-7697-01A	TCGA-85-7697-01A-11R-2125-07	LUSC	male	e1b8346e-beca-46d7-8910-4a54d6597c75	80aff590-a6ab-451a-b53a-e4a0ee3ed70d.rna_seq.augmented_star_gene_counts.tsv	4259036	61d85328d7bd0c7f3c939146ccc287cc	NO_NFE2L2
	TCGA-85-7698	TCGA-85-7698-01A	TCGA-85-7698-01A-11R-2125-07	LUSC	male	6856eeab-2013-4450-a936-fd647bde89ae	8b932b5b-fbbe-4c7b-aa17-4f243468ef4b.rna_seq.augmented_star_gene_counts.tsv	4255351	d29207a64c3eb45d5cddf71ec72afe8f	KEAP1
	TCGA-85-7699	TCGA-85-7699-01A	TCGA-85-7699-01A-11R-2125-07	LUSC	male	9ab3bfe1-463e-40b8-9380-da7cc3bf6d16	61419601-eb40-48c4-b221-f244a321287b.rna_seq.augmented_star_gene_counts.tsv	4255788	491b60cdd0226de8a20de9db2a59074a	NO_NFE2L2
	TCGA-85-7710	TCGA-85-7710-01A	TCGA-85-7710-01A-11R-2125-07	LUSC	female	bfbe5707-5610-46af-97cd-3fd43dc492de	d86d19a8-0368-4fd1-a8b1-2e793606315e.rna_seq.augmented_star_gene_counts.tsv	4243852	fa6f0f86971c4e8fba91034568f51c7c	NO_NFE2L2
	TCGA-85-7843	TCGA-85-7843-01A	TCGA-85-7843-01A-11R-2125-07	LUSC	male	6bbb0bd0-944b-40bb-bae6-a1b9b0bf63bb	ab3552b7-c181-483d-9fb9-7ffaadbed469.rna_seq.augmented_star_gene_counts.tsv	4251594	58761036239a47c500953ff83a3c5ea1	NO_NFE2L2
	TCGA-85-7844	TCGA-85-7844-01A	TCGA-85-7844-01A-11R-2125-07	LUSC	male	c02fdb09-ef01-4162-90dc-e42c0880bc34	4bd18000-5bd4-467c-8517-c6b0122c027f.rna_seq.augmented_star_gene_counts.tsv	4252110	a66aab2a1063dbec7ec67eb59bb70463	NO_NFE2L2
	TCGA-85-7950	TCGA-85-7950-01A	TCGA-85-7950-01A-11R-2187-07	LUSC	male	2773ff80-83f6-4e19-a384-e2f0e7ae92b3	b79f8294-ec5f-4d9c-9246-c695564f41ce.rna_seq.augmented_star_gene_counts.tsv	4245251	e858ff57223fa3e751836cced7c3d96e	NO_NFE2L2
	TCGA-85-8048	TCGA-85-8048-01A	TCGA-85-8048-01A-11R-2247-07	LUSC	male	cbdb3461-117e-47e5-949b-858e21b4681f	3584a182-0850-4df8-a0f2-f159a43330dc.rna_seq.augmented_star_gene_counts.tsv	4240079	85dc90789058d9e0d7146ed156d06f90	NO_NFE2L2
	TCGA-85-8049	TCGA-85-8049-01A	TCGA-85-8049-01A-11R-2247-07	LUSC	male	00810078-a4fc-4e1d-bbdc-e5e0d3080025	7fe52cc9-d15b-49da-b1fe-e5aacf530c36.rna_seq.augmented_star_gene_counts.tsv	4239022	91079ea800a70ba816381da847a58d42	NO_NFE2L2
	TCGA-85-8052	TCGA-85-8052-01A	TCGA-85-8052-01A-11R-2247-07	LUSC	male	7049a382-73c5-4bc1-8fdb-99f75b45cb17	27c510ca-d89f-48d7-be00-22edabef8bda.rna_seq.augmented_star_gene_counts.tsv	4228243	f9ff0e81d14620bb33dad886ebfc72c1	NFE2L2
	TCGA-85-8070	TCGA-85-8070-01A	TCGA-85-8070-01A-11R-2247-07	LUSC	male	943d7e24-0b89-4ea8-9e86-573a7187a58b	8a19153b-5260-4fb9-939c-a4764bce20b0.rna_seq.augmented_star_gene_counts.tsv	4229969	98ecc7681d9482c13e2e58c23d63ff95	KEAP1
	TCGA-85-8071	TCGA-85-8071-01A	TCGA-85-8071-01A-11R-2247-07	LUSC	male	cc058884-41cd-45d1-b0af-ed0ed1655368	08607841-6e14-4f93-ab7c-9baa9554ed44.rna_seq.augmented_star_gene_counts.tsv	4224934	25350431a809a44b8feaccf5df665716	NO_NFE2L2
	TCGA-85-8072	TCGA-85-8072-01A	TCGA-85-8072-01A-31R-2247-07	LUSC	male	e1f2dc8e-a550-404a-b2b1-b559f24270e6	b5e0f437-1b12-4d83-a0a1-b658bf36c5c1.rna_seq.augmented_star_gene_counts.tsv	4230883	4886babdafbf6ee61aa34ec3f98292ac	NO_NFE2L2
	TCGA-85-8276	TCGA-85-8276-01A	TCGA-85-8276-01A-11R-2296-07	LUSC	male	9d26a39d-2a0e-44d5-b71e-daa141f5bb83	17f3878a-810e-4487-b862-36f848946fdc.rna_seq.augmented_star_gene_counts.tsv	4234094	d347d907f3bfab18776073f387c3efef	NO_NFE2L2
	TCGA-85-8277	TCGA-85-8277-01A	TCGA-85-8277-01A-11R-2296-07	LUSC	male	88dabd87-62d9-443a-abfb-87aac7913130	fb9197ac-e658-4294-bf02-6dd0bc7a277b.rna_seq.augmented_star_gene_counts.tsv	4237597	6a10534fc8a8e450b05887d5b3d52864	NO_NFE2L2
	TCGA-85-8287	TCGA-85-8287-01A	TCGA-85-8287-01A-11R-2296-07	LUSC	male	5d0e6235-fe18-4081-a8f3-51e21c282303	08f92b8f-7cb8-41fd-955c-6482e9641ef8.rna_seq.augmented_star_gene_counts.tsv	4239643	df584c70cdc4eb96f2661172e4959612	NO_NFE2L2
	TCGA-85-8288	TCGA-85-8288-01A	TCGA-85-8288-01A-11R-2296-07	LUSC	male	4928764c-6c45-409a-b886-b9b458d37c2c	e4e9b46b-9fea-4358-908a-811d2bd44b54.rna_seq.augmented_star_gene_counts.tsv	4243641	b4a05013de2b54d4c7e5c43ca55071d4	NO_NFE2L2
	TCGA-85-8350	TCGA-85-8350-01A	TCGA-85-8350-01A-11R-2296-07	LUSC	male	a5101858-cab5-42b7-af4f-6f75dd62c36c	2e90137c-306a-4aee-b772-18827857d2e1.rna_seq.augmented_star_gene_counts.tsv	4251164	62ec0afe831cf9f49db27b83f4277ede	NO_NFE2L2
	TCGA-85-8351	TCGA-85-8351-01A	TCGA-85-8351-01A-11R-2296-07	LUSC	male	6938d1db-96a5-4250-9e5b-a13196bbaa67	1db59c3c-a6f8-4a45-9e1a-82b154577467.rna_seq.augmented_star_gene_counts.tsv	4235794	248f1e757b8a073c12c4d5ca87d44f61	NO_NFE2L2
	TCGA-85-8352	TCGA-85-8352-01A	TCGA-85-8352-01A-31R-2326-07	LUSC	male	4fc4b4e0-6a01-4e8f-89f8-f68203f0105d	4f22c37d-3ee4-4237-8b39-d7a9a91f2e2d.rna_seq.augmented_star_gene_counts.tsv	4237763	593f4ca8d702b7906c170c2c31529614	NO_NFE2L2
	TCGA-85-8353	TCGA-85-8353-01A	TCGA-85-8353-01A-21R-2296-07	LUSC	male	f2f16e96-2c61-47f3-a697-baec786f07a1	90f5d5aa-9eef-4cb3-a64c-7743a2fe572b.rna_seq.augmented_star_gene_counts.tsv	4240183	032a4bcf1d036000dd6b4bfaaddeec40	NO_NFE2L2
	TCGA-85-8354	TCGA-85-8354-01A	TCGA-85-8354-01A-31R-2326-07	LUSC	male	b2c562a3-93f7-4120-94d9-8d2393dd97b2	38714112-af05-4ed4-a433-431ba74f222c.rna_seq.augmented_star_gene_counts.tsv	4230846	5c6a694d877bb97b9dd7de41bc2e05de	KEAP1
	TCGA-85-8355	TCGA-85-8355-01A	TCGA-85-8355-01A-11R-2296-07	LUSC	male	e464e573-8420-4516-a4b0-27850d3a18dd	e3ef1128-694c-48d6-81ee-62f0ea6ec582.rna_seq.augmented_star_gene_counts.tsv	4247476	47c6ddd0ff0e701511ef4103ebe11908	NO_NFE2L2
	TCGA-85-8479	TCGA-85-8479-01A	TCGA-85-8479-01A-11R-2326-07	LUSC	male	f514f386-f7e8-4771-8d22-48430740328e	947d262c-5ccf-413a-868f-16ed7005a46b.rna_seq.augmented_star_gene_counts.tsv	4235954	9038ab5d116323307fb49b9993b5f04c	NO_NFE2L2
	TCGA-85-8481	TCGA-85-8481-01A	TCGA-85-8481-01A-11R-2326-07	LUSC	male	470afda8-c4a4-4161-b6e7-1f0d2372d2c7	7d2957c7-2c69-499d-9a75-aa54f04cb530.rna_seq.augmented_star_gene_counts.tsv	4225071	e9b7c91e96f59332c75b2dd6f040b739	NO_NFE2L2
	TCGA-85-8580	TCGA-85-8580-01A	TCGA-85-8580-01A-31R-2403-07	LUSC	female	723a8c8e-03e4-4f77-9944-f0c4a42ec3ce	d2cee676-1fc7-4cad-8214-5ee8dce19b44.rna_seq.augmented_star_gene_counts.tsv	4236056	b965074de946b0237eca0cc430d6e756	NO_NFE2L2
	TCGA-85-8582	TCGA-85-8582-01A	TCGA-85-8582-01A-21R-2403-07	LUSC	male	8d01df6d-4573-46dd-8f59-2b7b9aba7269	d461344d-7dab-4b6a-8fe6-259fe6452ecd.rna_seq.augmented_star_gene_counts.tsv	4227977	90b61c73aac04240b8bf4ed3bbc5d295	NO_NFE2L2
	TCGA-85-8584	TCGA-85-8584-01A	TCGA-85-8584-01A-11R-2403-07	LUSC	male	5fc2465c-ea55-4197-87d2-a3822c8164ef	e2a7e12b-a940-4031-ad7f-a02cbb2a338f.rna_seq.augmented_star_gene_counts.tsv	4231868	02bbc1643b0264ab8a65dd602d383a55	NO_NFE2L2
	TCGA-85-8664	TCGA-85-8664-01A	TCGA-85-8664-01A-11R-2403-07	LUSC	male	81e7d771-eb01-4025-93c8-83ad7e0f6408	3a361424-ea8c-4b61-b9bb-a4ce1d64e9d7.rna_seq.augmented_star_gene_counts.tsv	4232912	1b58b92409457a1479abe2976d74f537	NO_NFE2L2
	TCGA-85-8666	TCGA-85-8666-01A	TCGA-85-8666-01A-11R-2403-07	LUSC	male	e615e0d2-f715-462a-8132-1318bf79e2b1	022177a1-5c8c-4ef0-9743-34ebc03d6572.rna_seq.augmented_star_gene_counts.tsv	4230340	91475f7661d666d99cfc4ec7eed6f061	CUL3
	TCGA-85-A4CL	TCGA-85-A4CL-01A	TCGA-85-A4CL-01A-41R-A26W-07	LUSC	male	741148a5-d9b6-412d-9dfe-a5ccd9717de5	0579a43e-3d6a-4b55-b7b6-e46f2f826a63.rna_seq.augmented_star_gene_counts.tsv	4243070	693b69a3107ffe464938f0714c394918	NFE2L2
	TCGA-85-A4CN	TCGA-85-A4CN-01A	TCGA-85-A4CN-01A-11R-A24H-07	LUSC	female	99488a4a-85cb-4b08-96b4-c6a6a1238da9	3c6ef566-fb1a-48d6-9616-c64e7aed881a.rna_seq.augmented_star_gene_counts.tsv	4229852	5210d98306506ffaa5fc4b3ded78c5d1	CUL3
	TCGA-85-A4JB	TCGA-85-A4JB-01A	TCGA-85-A4JB-01A-51R-A262-07	LUSC	male	304d1243-0103-4bf7-919a-5bef507adb93	c4c5dca2-17d4-4bd2-ada9-f1c389182fed.rna_seq.augmented_star_gene_counts.tsv	4244894	b7383335d5ec0fc9b303043bacdd1c74	NO_NFE2L2
	TCGA-85-A4JC	TCGA-85-A4JC-01A	TCGA-85-A4JC-01A-11R-A24Z-07	LUSC	male	26085902-2521-4343-96f0-139a065445f4	c57847cd-6946-41ee-9c54-4bb766b42f12.rna_seq.augmented_star_gene_counts.tsv	4230084	f8fcdf603ad968183e38624c263e8345	NO_NFE2L2
	TCGA-85-A4PA	TCGA-85-A4PA-01A	TCGA-85-A4PA-01A-11R-A24Z-07	LUSC	male	7fff3f50-1510-4cea-a335-29814fe0ab10	a124b825-db72-4667-b83f-9454e506aecc.rna_seq.augmented_star_gene_counts.tsv	4240350	418080adc7cbc1c469340482752a4b74	NO_NFE2L2
	TCGA-85-A4QQ	TCGA-85-A4QQ-01A	TCGA-85-A4QQ-01A-41R-A262-07	LUSC	male	343f1771-4a3d-4a03-9eb0-319dada0b373	042d1918-78a0-4655-a421-0c8b38538170.rna_seq.augmented_star_gene_counts.tsv	4234922	a71b0f841ae4995edcb5631aa509de4c	NO_NFE2L2
	TCGA-85-A4QR	TCGA-85-A4QR-01A	TCGA-85-A4QR-01A-11R-A24Z-07	LUSC	male	4394ba2a-2229-4960-b346-cc654623650a	a462c0f9-23d3-428b-9b61-e42cb6a68af1.rna_seq.augmented_star_gene_counts.tsv	4235646	346ffe339f5e7b71edc50f763e9913b4	NO_NFE2L2
	TCGA-85-A50M	TCGA-85-A50M-01A	TCGA-85-A50M-01A-21R-A262-07	LUSC	male	9f6308ed-98f2-44cf-b3de-b534ccf808f9	68b558ca-c3bb-4a1f-b133-624c4bc0e2dc.rna_seq.augmented_star_gene_counts.tsv	4241916	0166e41b75bffeb6010ace26b4db6243	NO_NFE2L2
	TCGA-85-A50Z	TCGA-85-A50Z-01A	TCGA-85-A50Z-01A-21R-A262-07	LUSC	male	c9945774-3973-498c-a784-8a7b41b99d5d	94fd1716-2a81-4150-8816-daf54f2bb604.rna_seq.augmented_star_gene_counts.tsv	4230599	aa152a54f376c82492f83c0309bbc64d	NO_NFE2L2
	TCGA-85-A510	TCGA-85-A510-01A	TCGA-85-A510-01A-11R-A26W-07	LUSC	female	afa54e2a-f119-4729-9db4-9b98ba17ac44	1e8317d1-4bf5-4205-a280-1b7a6baa5d29.rna_seq.augmented_star_gene_counts.tsv	4239012	10923e7cb6ff1e119fb46f16f6a6392f	NO_NFE2L2
	TCGA-85-A511	TCGA-85-A511-01A	TCGA-85-A511-01A-21R-A262-07	LUSC	male	b6275344-52a5-4a39-afea-c01b9099c15f	60ccd966-aa62-448d-85c4-ba048e938194.rna_seq.augmented_star_gene_counts.tsv	4246209	a7eda938b9928f930aa904fbcbbd9b6e	NO_NFE2L2
	TCGA-85-A512	TCGA-85-A512-01A	TCGA-85-A512-01A-11R-A26W-07	LUSC	male	5da11eb6-0570-43e8-bb80-05fbd75bb347	9b1cbbad-58a1-4591-98b6-16292454d6f6.rna_seq.augmented_star_gene_counts.tsv	4240979	19d76abc6dc435c3de96dac5e898ccb8	NO_NFE2L2
	TCGA-85-A513	TCGA-85-A513-01A	TCGA-85-A513-01A-12R-A26W-07	LUSC	female	a271ba96-1fd1-4152-ad5b-0b0fa67d0574	11c017a7-92d7-4c1f-a90a-3f7eb3cc9571.rna_seq.augmented_star_gene_counts.tsv	4230779	84bed23d7e40dd52f5e61546396e03cc	NO_NFE2L2
	TCGA-85-A53L	TCGA-85-A53L-01A	TCGA-85-A53L-01A-21R-A26W-07	LUSC	male	964fcdaf-b5d1-4fc2-8d3a-08013d6fe4d8	ea02dcce-82f9-42d6-82fa-0ebd940138a4.rna_seq.augmented_star_gene_counts.tsv	4247211	c7139d2e98e8cbdcbcaa6dd4e4bad8d4	NO_NFE2L2
	TCGA-85-A5B5	TCGA-85-A5B5-01A	TCGA-85-A5B5-01A-21R-A26W-07	LUSC	male	d11530dd-3470-4187-8046-e26401ccd91d	82bd3194-3620-402f-b773-850722ebcf8e.rna_seq.augmented_star_gene_counts.tsv	4246618	39a6984fb98cc5a3cfaad4301bd8c489	NO_NFE2L2
	TCGA-90-6837	TCGA-90-6837-01A	TCGA-90-6837-01A-11R-1949-07	LUSC	male	e67aefdf-0c86-4390-aee1-2774d24c6cd1	fb202ad6-ab00-453e-bc4e-bdc96965995e.rna_seq.augmented_star_gene_counts.tsv	4242908	aeb37391bf623839a6c2b4b785ec5f50	NO_NFE2L2
	TCGA-90-7766	TCGA-90-7766-01A	TCGA-90-7766-01A-21R-2125-07	LUSC	female	bc278946-a5c8-4b1a-a5cc-583ab4ee1420	afe1d6a7-79e5-426b-8b15-aa67e84b3c03.rna_seq.augmented_star_gene_counts.tsv	4254682	c2444c83d567dd95eafdcd7376f864eb	NO_NFE2L2
	TCGA-90-7767	TCGA-90-7767-01A	TCGA-90-7767-01A-11R-2125-07	LUSC	male	1a80f876-7306-4068-998a-3f32849173ca	64499b79-1354-4277-9142-40f388fa6e92.rna_seq.augmented_star_gene_counts.tsv	4247630	887d2aadd51bd7b60c61b8ff01814f66	NO_NFE2L2
	TCGA-90-7769	TCGA-90-7769-01A	TCGA-90-7769-01A-11R-2125-07	LUSC	male	a9a84990-9ace-401d-989c-5167dd1f5efe	5a915ccc-a963-4609-a7a2-9886a2ca9d26.rna_seq.augmented_star_gene_counts.tsv	4236177	f3dac4bc67e40e7359768c3be051064c	NO_NFE2L2
	TCGA-90-7964	TCGA-90-7964-01A	TCGA-90-7964-01A-21R-2187-07	LUSC	male	dbdf3ac8-5a7b-4552-8713-44c819c88fc4	98f050e8-0329-4978-955d-20782d692d41.rna_seq.augmented_star_gene_counts.tsv	4245644	590b51fb5352b367ddc2738776ff8ddd	KEAP1
	TCGA-90-A4ED	TCGA-90-A4ED-01A	TCGA-90-A4ED-01A-31R-A24Z-07	LUSC	male	12898e2b-86d5-4c0e-8a53-dec1fd528f42	cb8d1dc4-bfc1-46ba-8e31-af63a0fd5eab.rna_seq.augmented_star_gene_counts.tsv	4242821	c6f4933978d266b4df730d353861aaa6	NO_NFE2L2
	TCGA-90-A4EE	TCGA-90-A4EE-01A	TCGA-90-A4EE-01A-11R-A24Z-07	LUSC	male	000b6b94-572d-4d06-a8f4-2e43829f83d4	e74f321c-217f-4bdc-ad17-f132501b5157.rna_seq.augmented_star_gene_counts.tsv	4249732	d83b0cf538490cded6fc6de3b8e3ac31	NO_NFE2L2
	TCGA-90-A59Q	TCGA-90-A59Q-01A	TCGA-90-A59Q-01A-11R-A26W-07	LUSC	female	966cba2c-ca26-4861-8ed6-d6682511000a	37926dd6-7398-47e4-b62e-d673ec619ea9.rna_seq.augmented_star_gene_counts.tsv	4236589	32ac82f49b29d73edcf43ab312c0f571	NO_NFE2L2
	TCGA-92-7340	TCGA-92-7340-01A	TCGA-92-7340-01A-21R-2045-07	LUSC	female	6590155e-5fe1-460a-8ed3-a4d8516d55b2	f6091416-01d7-45d0-9bec-2a84cfdcc413.rna_seq.augmented_star_gene_counts.tsv	4245002	7f3702f93793220d633a710028227266	KEAP1
	TCGA-92-7341	TCGA-92-7341-01A	TCGA-92-7341-01A-31R-2045-07	LUSC	male	8dc3309f-0346-478c-a704-872a046ff2aa	0672c617-1b52-4184-b879-87817fcc38b7.rna_seq.augmented_star_gene_counts.tsv	4245877	94f9377d0161fb6d958c6fcbe6ff433b	NFE2L2
	TCGA-92-8063	TCGA-92-8063-01A	TCGA-92-8063-01A-11R-2247-07	LUSC	male	02a9936a-363e-4874-8f97-715a117973bd	b605621a-61c1-4542-b6c7-3f4729e68b9f.rna_seq.augmented_star_gene_counts.tsv	4230713	6a58d3270501a32367c51d39aada5136	KEAP1
	TCGA-92-8064	TCGA-92-8064-01A	TCGA-92-8064-01A-11R-2247-07	LUSC	male	d7550b55-333d-415d-8360-e0f2e70634ce	124b3a55-c2b5-4299-b9ee-42da2bdeaa70.rna_seq.augmented_star_gene_counts.tsv	4226072	fa1d58a5bbff35b2051a794f10115262	NFE2L2
	TCGA-92-8065	TCGA-92-8065-01A	TCGA-92-8065-01A-11R-2247-07	LUSC	female	3cbe42eb-653f-4d85-aa94-e803a1f3516b	af4e18e3-b98c-468f-b0d1-643fe3cd3760.rna_seq.augmented_star_gene_counts.tsv	4239430	9a48fb2f8da29736e8e3566047bb8db6	NO_NFE2L2
	TCGA-94-7033	TCGA-94-7033-01A	TCGA-94-7033-01A-11R-1949-07	LUSC	male	94cab1e2-dcd6-43b7-b359-75b0c4a485ba	23f1ad0c-c9d5-408f-bba8-1bb71364007b.rna_seq.augmented_star_gene_counts.tsv	4242913	463634784609f248b1f877bab3d4f045	NO_NFE2L2
	TCGA-94-7557	TCGA-94-7557-01A	TCGA-94-7557-01A-11R-2125-07	LUSC	male	9248b749-a2ae-4d64-a0b4-3c2bf0f7ed62	687c405f-8a15-4be2-b427-ee7620ab199e.rna_seq.augmented_star_gene_counts.tsv	4251880	e8b1838f2074b022ae1ff96a983c7f91	KEAP1
	TCGA-94-7943	TCGA-94-7943-01A	TCGA-94-7943-01A-11R-2187-07	LUSC	male	3c03e4c3-c684-40c4-9d0f-9f6e36493ae1	e10c5b73-6716-4222-acba-de1116432daa.rna_seq.augmented_star_gene_counts.tsv	4251223	53f0457f0a4312dc317dfb5b58ee1125	NO_NFE2L2
	TCGA-94-8035	TCGA-94-8035-01A	TCGA-94-8035-01A-11R-2247-07	LUSC	male	bc59ae84-15d7-4887-9233-9bab673979e1	e38cba45-52c9-413e-86e7-707598d9cf3e.rna_seq.augmented_star_gene_counts.tsv	4235376	b10c7ae80e3024e5430b3715b4be21b0	NO_NFE2L2
	TCGA-94-8490	TCGA-94-8490-01A	TCGA-94-8490-01A-11R-2326-07	LUSC	male	614cd2d9-e7f9-4247-a38f-f4ac8fd3b484	01c2d483-14b3-4a2e-b31c-c9b18cf68059.rna_seq.augmented_star_gene_counts.tsv	4238679	045f66391cd57904e7d6a323a41cdc8d	KEAP1
	TCGA-94-8491	TCGA-94-8491-01A	TCGA-94-8491-01A-11R-2326-07	LUSC	male	208d9341-7ba6-4167-8c2a-90ae6513e36f	9d56219d-4349-4331-9b32-f80230dc85c6.rna_seq.augmented_star_gene_counts.tsv	4236253	de61c83cad699745c40156a325c0510c	NO_NFE2L2
	TCGA-94-A4VJ	TCGA-94-A4VJ-01A	TCGA-94-A4VJ-01A-11R-A24Z-07	LUSC	female	28ab7cb4-b27e-407f-b999-b411ecd263c2	c0699d26-3da6-4ade-99b3-d84611d62191.rna_seq.augmented_star_gene_counts.tsv	4235197	d5d945e7c9d4a460bece17e976bd0475	NO_NFE2L2
	TCGA-94-A5I4	TCGA-94-A5I4-01A	TCGA-94-A5I4-01A-11R-A26W-07	LUSC	male	d5a9ed78-88ed-409c-8947-f1cd3fa6fce9	37d5fa1c-283e-419d-94d5-0ca40fb12349.rna_seq.augmented_star_gene_counts.tsv	4236703	e33413df1d1b3bed23faf202aa8676bf	NO_NFE2L2
	TCGA-94-A5I6	TCGA-94-A5I6-01A	TCGA-94-A5I6-01A-21R-A27Q-07	LUSC	male	dce0ae40-4251-43e7-b25f-8b3ba700d1b0	75a4f53f-4388-4a69-8ee2-9765532b7f1c.rna_seq.augmented_star_gene_counts.tsv	4242432	f0e7c531f410e53262657e3993e8e21d	NFE2L2
	TCGA-96-7544	TCGA-96-7544-01A	TCGA-96-7544-01A-11R-2045-07	LUSC	male	49a41cb0-13b7-4a1d-ba2b-9e978e6c3a86	08552b37-2d39-4696-a9b0-71795a276b7b.rna_seq.augmented_star_gene_counts.tsv	4251679	78abbd2e20757a3d0a38bd069d49b098	NO_NFE2L2
	TCGA-96-7545	TCGA-96-7545-01A	TCGA-96-7545-01A-21R-2045-07	LUSC	male	e10aaba3-1a82-405e-8fc5-81594351b775	bbe66330-7ed8-4c41-bfa9-53bdfce3cc1f.rna_seq.augmented_star_gene_counts.tsv	4248165	d5630b37a5eee5657e693d2d0c57023a	NO_NFE2L2
	TCGA-96-8169	TCGA-96-8169-01A	TCGA-96-8169-01A-11R-2296-07	LUSC	female	2ca334ad-b3a2-4d1e-871b-85ffda291a43	138a59d3-ccab-4bb2-ae53-c46b1db766a0.rna_seq.augmented_star_gene_counts.tsv	4244394	32e23841a92c09ec3a46c6f815c18723	NO_NFE2L2
	TCGA-96-8170	TCGA-96-8170-01A	TCGA-96-8170-01A-11R-2296-07	LUSC	female	4b8994c3-c922-4929-9ffd-eb47a6193a68	df54d228-fd7f-4267-a0ee-5adbf3d81796.rna_seq.augmented_star_gene_counts.tsv	4247184	0ca875065de3536bfee342b3a7c98703	NO_NFE2L2
X	TCGA-96-A4JK	TCGA-96-A4JK-01A	TCGA-96-A4JK-01A-11R-A24Z-07	LUSC	male	ada4ae4b-1959-49a1-b3db-59675ba2ade0	1579c2d5-2873-473b-b299-19100bac3e9f.rna_seq.augmented_star_gene_counts.tsv	4243504	5c7e4f20bdb2ef6e59eb074d9f1feafc		No mutation data
	TCGA-96-A4JL	TCGA-96-A4JL-01A	TCGA-96-A4JL-01A-11R-A24Z-07	LUSC	female	e6d4a439-2636-4ecf-b611-d2085c258730	0139ef5f-7adc-4e84-90c1-42ebf59aaf98.rna_seq.augmented_star_gene_counts.tsv	4249230	8f883401f5328613f9b6064e4266ca1c	NO_NFE2L2
	TCGA-98-7454	TCGA-98-7454-01A	TCGA-98-7454-01A-11R-2045-07	LUSC	male	cac5bca1-92c4-4f80-85eb-c6df5741a263	90dfdb4c-21ab-4a5b-908a-c7b7419d424e.rna_seq.augmented_star_gene_counts.tsv	4247945	28b8e7509423c4c45f047fdb9b4eb116	NO_NFE2L2
	TCGA-98-8020	TCGA-98-8020-01A	TCGA-98-8020-01A-11R-2247-07	LUSC	female	10acdc61-cf73-4187-a6d2-f7d2e1565cec	28f4a0c0-3ded-487c-9f16-64c551e39886.rna_seq.augmented_star_gene_counts.tsv	4227144	fc7d6a9724278e5cdc61c205240c9467	NO_NFE2L2
	TCGA-98-8021	TCGA-98-8021-01A	TCGA-98-8021-01A-11R-2247-07	LUSC	female	db3b76cb-5f0d-4df2-b42b-3e66e102b286	498a2b3c-8330-4e83-9002-80e8faacd1d3.rna_seq.augmented_star_gene_counts.tsv	4243311	cc917d6bbbec1f1cf31234364ac62e11	NO_NFE2L2
	TCGA-98-8022	TCGA-98-8022-01A	TCGA-98-8022-01A-11R-2247-07	LUSC	male	31f07873-2605-4964-92ee-d93616655ef8	a77e253d-d9c6-4803-87aa-af6169b5546c.rna_seq.augmented_star_gene_counts.tsv	4235718	9d1b17706cb7f050142ca1da38d85de2	NO_NFE2L2
	TCGA-98-8023	TCGA-98-8023-01A	TCGA-98-8023-01A-11R-2247-07	LUSC	male	bebca0ac-b673-4d1b-bc34-31806d1b6dff	27ebac4a-87b1-4aec-b856-8f7acde78990.rna_seq.augmented_star_gene_counts.tsv	4228530	e8f679067fb87eabf76ad9270a626564	NO_NFE2L2
	TCGA-98-A538	TCGA-98-A538-01A	TCGA-98-A538-01A-11R-A262-07	LUSC	male	7aec753d-4fad-42f3-a5f8-066ed421d069	31eef80b-438a-4bad-aee6-3aca3ab59f9e.rna_seq.augmented_star_gene_counts.tsv	4239924	ca86734dbf5bfd4e4098a34c11691bf0	NO_NFE2L2
	TCGA-98-A539	TCGA-98-A539-01A	TCGA-98-A539-01A-31R-A262-07	LUSC	male	b6c1dec1-e51f-48e9-90b3-3b47ae8de832	c15bee9b-18e0-433d-8216-32193639733c.rna_seq.augmented_star_gene_counts.tsv	4239736	3394be7181a07e159e0d4cb270d85aa6	KEAP1
	TCGA-98-A53A	TCGA-98-A53A-01A	TCGA-98-A53A-01A-11R-A262-07	LUSC	male	8d5a94c8-b3d9-4991-8ce9-f7aa9189938c	4cbbd805-2dd4-479d-ae3b-ac8292540210.rna_seq.augmented_star_gene_counts.tsv	4241986	c45a34ba216855dc688ac4e09de7bec9	CUL3
	TCGA-98-A53B	TCGA-98-A53B-01A	TCGA-98-A53B-01A-11R-A262-07	LUSC	male	dfb6070a-cc20-441d-baaa-7327d6871b2b	43a4d171-846d-49e9-9e61-ce57f83c8bea.rna_seq.augmented_star_gene_counts.tsv	4250377	c6890acd1727e38536e7872a05b09f5c	NO_NFE2L2
	TCGA-98-A53C	TCGA-98-A53C-01A	TCGA-98-A53C-01A-11R-A262-07	LUSC	female	10bec46a-08c3-4fe7-a65a-d801705fca17	90b40e5e-f443-45aa-a810-7026010c41f4.rna_seq.augmented_star_gene_counts.tsv	4247739	45fec7e248602354efb4c8e32e6d0a92	NO_NFE2L2
	TCGA-98-A53D	TCGA-98-A53D-01A	TCGA-98-A53D-01A-32R-A262-07	LUSC	male	e8a0217b-86ba-47ef-83f6-1673cd259aec	2a1a5931-9e05-45f4-bbb9-22659ede3bbb.rna_seq.augmented_star_gene_counts.tsv	4242571	49daf550e914f0f710c3780d58fca13c	NO_NFE2L2
	TCGA-98-A53H	TCGA-98-A53H-01A	TCGA-98-A53H-01A-12R-A262-07	LUSC	female	5be877e7-15a7-48e6-b05a-cb1dfa39aa25	f74ee32a-ef90-471a-a440-4bd444e8113e.rna_seq.augmented_star_gene_counts.tsv	4256050	75a43cd8d9858269bd1de24b70c44c37	NO_NFE2L2
	TCGA-98-A53I	TCGA-98-A53I-01A	TCGA-98-A53I-01A-31R-A262-07	LUSC	male	f1acda6d-314c-446b-bac1-d59491b04f5e	fcf92af8-a604-413c-9a52-44a612402a19.rna_seq.augmented_star_gene_counts.tsv	4249956	93084bcad073e6452d6fdb4261441c47	NO_NFE2L2
	TCGA-98-A53J	TCGA-98-A53J-01A	TCGA-98-A53J-01A-11R-A26W-07	LUSC	male	108d78db-9d31-4dbf-86f7-5e50134b91a6	dbdf55c4-832a-4eec-ac78-d6b83dcc0645.rna_seq.augmented_star_gene_counts.tsv	4229503	2940b21dcaa8aed3054647aa29d39189	NO_NFE2L2
	TCGA-J1-A4AH	TCGA-J1-A4AH-01A	TCGA-J1-A4AH-01A-31R-A24H-07	LUSC	male	752b0067-d61f-4c6f-bd71-46e0338f15de	52a41293-9031-4b0c-ac1e-7b01a645248d.rna_seq.augmented_star_gene_counts.tsv	4223591	6ccd764ec1b0e9fc022a64c9f8dc2e30	NFE2L2
	TCGA-L3-A4E7	TCGA-L3-A4E7-01A	TCGA-L3-A4E7-01A-11R-A24Z-07	LUSC	male	0b050c63-6aed-4573-bac1-30d36781fb1a	56ef1e18-3469-4e54-b117-4927b46c8b02.rna_seq.augmented_star_gene_counts.tsv	4243266	9a1cfe019567ff42389ffb3f29b932d2	NO_NFE2L2
	TCGA-L3-A524	TCGA-L3-A524-01A	TCGA-L3-A524-01A-11R-A262-07	LUSC	female	20bce22d-ac03-4799-83d4-02d68f3b11a8	4a7243d8-65d3-4bc1-be10-db26c4eedcfe.rna_seq.augmented_star_gene_counts.tsv	4242334	14f43ef9f3bcb69e57126f543d83102d	NO_NFE2L2
	TCGA-LA-A446	TCGA-LA-A446-01A	TCGA-LA-A446-01A-21R-A24Z-07	LUSC	male	19523b40-a72b-47d3-acad-9720a26128ed	8c2b89a9-e994-46d9-b215-30882f4f1950.rna_seq.augmented_star_gene_counts.tsv	4243392	273c60e8e8cd3e9ffd6940bb766eb8d7	NO_NFE2L2
	TCGA-LA-A7SW	TCGA-LA-A7SW-01A	TCGA-LA-A7SW-01A-11R-A405-07	LUSC	male	e4f1f5e7-b13d-4968-a6cc-b877f107e470	edf31bdf-694c-413e-97a8-3f4e6baea5cb.rna_seq.augmented_star_gene_counts.tsv	4248934	829dc1140f4483ca0355dc4d11703d1a	NO_NFE2L2
	TCGA-MF-A522	TCGA-MF-A522-01A	TCGA-MF-A522-01A-11R-A262-07	LUSC	male	80f4c1e6-573a-4ac9-bdec-96c0a0da49f0	58cab238-8bc8-468f-bc7a-7a10178ac751.rna_seq.augmented_star_gene_counts.tsv	4234620	ddef57fda693f9a359ec371d131474b8	KEAP1
	TCGA-NC-A5HD	TCGA-NC-A5HD-01A	TCGA-NC-A5HD-01A-11R-A26W-07	LUSC	male	6e46c824-acbb-4ef1-9b07-f952f89526dc	46dc8d50-6055-4d83-a837-543500f0095d.rna_seq.augmented_star_gene_counts.tsv	4233530	7eeefec82d062830167978d8fd324c68	NO_NFE2L2
	TCGA-NC-A5HE	TCGA-NC-A5HE-01A	TCGA-NC-A5HE-01A-11R-A26W-07	LUSC	male	5bb8ce26-770f-48cc-a481-466469d34073	4f179a2f-1e37-4ad9-9f21-0a6f1ecdf03e.rna_seq.augmented_star_gene_counts.tsv	4245566	58574bd6333f494d9ba69fc25d2d8f7c	NO_NFE2L2
	TCGA-NC-A5HF	TCGA-NC-A5HF-01A	TCGA-NC-A5HF-01A-11R-A26W-07	LUSC	male	b8497310-afb9-4e44-b643-24ca1e30b858	2d36e0de-e943-4569-9411-a8f770883550.rna_seq.augmented_star_gene_counts.tsv	4243701	15f23ec1127edc87da890625d1c955bd	NO_NFE2L2
	TCGA-NC-A5HG	TCGA-NC-A5HG-01A	TCGA-NC-A5HG-01A-11R-A26W-07	LUSC	male	7e0f37e9-280e-470d-8ec0-aa57fbd5f07c	88f0e50c-df5f-42c6-b591-97dd11572f63.rna_seq.augmented_star_gene_counts.tsv	4233200	2b17f9b502e852ac859a49c08a05a162	NO_NFE2L2
	TCGA-NC-A5HH	TCGA-NC-A5HH-01A	TCGA-NC-A5HH-01A-11R-A26W-07	LUSC	male	86ed5b38-ea85-43c1-a4bf-a8b6dbdf6425	2790a8f4-e86f-4caf-b560-3394c5c65c7d.rna_seq.augmented_star_gene_counts.tsv	4243545	a048d8317b17f043cbeb7d89fb63bcda	NO_NFE2L2
	TCGA-NC-A5HI	TCGA-NC-A5HI-01A	TCGA-NC-A5HI-01A-11R-A26W-07	LUSC	female	ddf190fa-393b-46f9-8793-c6eb4f08313b	ce29461e-97c1-47cc-bef8-65f2637927e8.rna_seq.augmented_star_gene_counts.tsv	4243294	fc48df974435ebe9d4c7bbec86aac0f5	NO_NFE2L2
	TCGA-NC-A5HJ	TCGA-NC-A5HJ-01A	TCGA-NC-A5HJ-01A-11R-A26W-07	LUSC	male	5faf8a12-a2aa-44f1-b099-02106766ec94	e653f78b-82dc-4068-938e-c59cfae00c68.rna_seq.augmented_star_gene_counts.tsv	4243653	1e252fc2c0e92ef09a0f4f94d23c1c7c	NO_NFE2L2
	TCGA-NC-A5HK	TCGA-NC-A5HK-01A	TCGA-NC-A5HK-01A-11R-A26W-07	LUSC	female	454cc158-5444-4201-9672-ef1d1f0516ed	ee2afa06-246e-4e43-9a2f-22cd500ea8f7.rna_seq.augmented_star_gene_counts.tsv	4248444	44db0764621b78fb96dd8248d426b4c9	NO_NFE2L2
	TCGA-NC-A5HL	TCGA-NC-A5HL-01A	TCGA-NC-A5HL-01A-11R-A26W-07	LUSC	male	302b01b1-2e13-4e84-b6fa-eb1a0e69b77c	8aeba86d-0636-4577-a47b-1390c3f5e6c4.rna_seq.augmented_star_gene_counts.tsv	4240502	d00a20c474c768fa4e6054bbb25414d4	NO_NFE2L2
	TCGA-NC-A5HM	TCGA-NC-A5HM-01A	TCGA-NC-A5HM-01A-12R-A26W-07	LUSC	male	5612d369-8009-4b81-89da-b2d396445e35	51e40bd0-3142-4f17-969c-840c76f9838f.rna_seq.augmented_star_gene_counts.tsv	4233129	489f0c3a2fbc07cfb9125dfc8f87d150	NO_NFE2L2
	TCGA-NC-A5HN	TCGA-NC-A5HN-01A	TCGA-NC-A5HN-01A-11R-A26W-07	LUSC	male	61e08327-b344-426c-83f6-4669fa77c3d6	5cfb768f-7b49-4a72-92c9-d7502f5ba5b8.rna_seq.augmented_star_gene_counts.tsv	4236104	b4e562f99d317090f1fab08bbd772068	NO_NFE2L2
	TCGA-NC-A5HO	TCGA-NC-A5HO-01A	TCGA-NC-A5HO-01A-11R-A26W-07	LUSC	female	32c01bbe-737b-41c0-804a-4f620ffae75e	8d35c93e-8403-48a2-92a9-a9cec9ca8349.rna_seq.augmented_star_gene_counts.tsv	4216741	00aee084757fa6da0c6e2336a5fd656b	NO_NFE2L2
	TCGA-NC-A5HP	TCGA-NC-A5HP-01A	TCGA-NC-A5HP-01A-11R-A26W-07	LUSC	male	fe1c2811-57fa-4cd8-b5ea-305bb45aabb3	b8431ad9-df0f-4d20-b660-410a5cb12821.rna_seq.augmented_star_gene_counts.tsv	4237014	0df234d2c2704a3c3cc84f1876962db7	NO_NFE2L2
	TCGA-NC-A5HQ	TCGA-NC-A5HQ-01A	TCGA-NC-A5HQ-01A-11R-A26W-07	LUSC	male	cc13dbbd-b93d-4350-9bfe-b22bbce316fe	01fedc3d-9c6f-45c5-be81-c098299f6f9f.rna_seq.augmented_star_gene_counts.tsv	4250444	4448c074d3ecdbbcc2a40f4f718fd5b5	NO_NFE2L2
	TCGA-NC-A5HR	TCGA-NC-A5HR-01A	TCGA-NC-A5HR-01A-21R-A26W-07	LUSC	female	1df39a00-527b-4218-8925-59420089415f	272c5ded-ff44-4c38-8461-c9fa8089799b.rna_seq.augmented_star_gene_counts.tsv	4236864	8e50697619bfbf23c86fc0f1389129ea	NO_NFE2L2
	TCGA-NC-A5HT	TCGA-NC-A5HT-01A	TCGA-NC-A5HT-01A-11R-A26W-07	LUSC	male	f34cfca8-0af0-4bd3-be67-a79d5bb31825	89932427-8666-4c29-b628-d2c78ac1183d.rna_seq.augmented_star_gene_counts.tsv	4249715	15f3f3adbd284c28df43876add8839c6	NO_NFE2L2
	TCGA-NK-A5CR	TCGA-NK-A5CR-01A	TCGA-NK-A5CR-01A-11R-A26W-07	LUSC	male	55a9ef90-80c4-45af-b65f-8c3766ad93a6	93f8d34b-ef94-4875-9cfb-7f2e5124c972.rna_seq.augmented_star_gene_counts.tsv	4220907	65580d30f3728618378e5f79089a9c6b	NO_NFE2L2
	TCGA-NK-A5CT	TCGA-NK-A5CT-01A	TCGA-NK-A5CT-01A-31R-A26W-07	LUSC	male	26fc2982-0376-40d8-8829-50a6d8c71b85	4ea1f43b-d7c9-4f69-9d95-3de67306dfae.rna_seq.augmented_star_gene_counts.tsv	4232126	d79d8b7df7e61c03608a32b53e0064ab	NO_NFE2L2
	TCGA-NK-A5CX	TCGA-NK-A5CX-01A	TCGA-NK-A5CX-01A-11R-A26W-07	LUSC	male	aae8b819-2be3-4985-ae56-5d88b21e6fd4	03f16d3d-545b-4e25-8ed6-d2b2b99cf65f.rna_seq.augmented_star_gene_counts.tsv	4238558	762cb146e1b49a604ad79e84e28a0e87	NO_NFE2L2
X	TCGA-NK-A5D1	TCGA-NK-A5D1-01A	TCGA-NK-A5D1-01A-11R-A26W-07	LUSC	male	441e6227-4fa3-4891-92ec-8a6f93a02ec6	fdbb6067-944b-42be-a7d3-9b200157e0f6.rna_seq.augmented_star_gene_counts.tsv	4243563	c0a7738edcb51e41f8499bbc7dd20824		No mutation data
	TCGA-NK-A7XE	TCGA-NK-A7XE-01A	TCGA-NK-A7XE-01A-12R-A405-07	LUSC	male	f7a10e9e-496d-4664-b62d-c2d5e6ea662c	b5b314be-b56c-4fd2-8a99-033afd55c6da.rna_seq.augmented_star_gene_counts.tsv	4223610	51be9979cf3dd2d543661f51b11d6016	NO_NFE2L2
	TCGA-O2-A52N	TCGA-O2-A52N-01A	TCGA-O2-A52N-01A-11R-A26W-07	LUSC	male	fd22fbac-3add-4e12-8bba-49f42e0bb39a	01d30473-7c6c-43ea-adf9-777c37917f88.rna_seq.augmented_star_gene_counts.tsv	4242019	61b9f0902e01c1706661368ec680f6f2	NO_NFE2L2
	TCGA-O2-A52Q	TCGA-O2-A52Q-01A	TCGA-O2-A52Q-01A-11R-A26W-07	LUSC	female	2973cb07-6eeb-4df1-82da-2f4b3793c834	3d03e0bf-88fd-48a0-995c-4f9b7703b981.rna_seq.augmented_star_gene_counts.tsv	4236470	a6d05f975d758caaf12376f2507b39c3	KEAP1
	TCGA-O2-A52S	TCGA-O2-A52S-01A	TCGA-O2-A52S-01A-11R-A262-07	LUSC	female	ecf4dc55-b6a2-47de-8443-ce57b8362209	2d5147ef-d38d-4341-a8da-6c0fa8482cd3.rna_seq.augmented_star_gene_counts.tsv	4248496	0113c09a5a3fed4b16c0b3477e368d1f	CUL3
	TCGA-O2-A52V	TCGA-O2-A52V-01A	TCGA-O2-A52V-01A-31R-A262-07	LUSC	female	9a48159b-edd0-40ee-ad8c-d216c75c8514	0a4a7c26-a258-4874-ab27-86dcdd0d91ee.rna_seq.augmented_star_gene_counts.tsv	4245725	9de7c6578082537552ce6adcb530a7e6	NO_NFE2L2
	TCGA-O2-A52W	TCGA-O2-A52W-01A	TCGA-O2-A52W-01A-11R-A26W-07	LUSC	male	ac8b8255-d058-4a35-9aa3-7b541e6ece12	a1186717-f0f7-497e-9b5c-4ee4033ea8e1.rna_seq.augmented_star_gene_counts.tsv	4233182	d78d780810fba0f69461b8120fa76284	NO_NFE2L2
	TCGA-O2-A5IB	TCGA-O2-A5IB-01A	TCGA-O2-A5IB-01A-11R-A27Q-07	LUSC	female	17ddff0c-a5c2-4f82-b638-fe13c20de1d3	385d5ffe-02ae-4fed-8590-b332d08597bb.rna_seq.augmented_star_gene_counts.tsv	4258388	fc52dfbe830547c094116162ef92f7b1	NO_NFE2L2
	TCGA-XC-AA0X	TCGA-XC-AA0X-01A	TCGA-XC-AA0X-01A-32R-A405-07	LUSC	female	af4b1495-7078-4042-8d0d-1769b7dcc53d	9643ba21-d26d-441e-a68d-ce4b98790711.rna_seq.augmented_star_gene_counts.tsv	4244106	3d61bd63df4c2be510a927b990004056	KEAP1

## Sheet: headDesc
heading	description
skip	Exclude this sample from analysis
subject	TCGA subject bar code
sample	TCGA sample bar code
aliquot	TCGA aliquot bar code
tumorType	TCGA tumor type study code
dir	Download directory for expression data file
file	Expression data file name in download directory
size	Size of expression file in bytes
md5	md5 checksum for expression file
nfe2l2	NRF2 pathway activation status (source of activation)
skipReason	Reason sample is excluded from analysis, if any
