# Supplementary material for: Activating NRF2E79Q mutation alters the differentiation of human non-small cell lung cancer
Source: Research Square preprint supplement (doi:10.21203/rs.3.rs-6606334/v1), 2025-05-15
Supplement: Supplementary file 3 [file ff653ebaadb8d432f7d64317.xlsx]

## Sheet: Supplementary Table 4
Supplementary Table 4. Detailed information on the top 30 pathways activated in primary human tumors compred to H358 and H596 cell lines presented in this study
Pathways_Human LUAD	pval	padj	ES (mut/wt)	NES	H358	pval	padj	ES (mut/wt)	NES	LUSC	pval	padj	ES (mut/wt)	NES	H596	pval	padj	ES (mut/wt)	NES
BLANCO_MELO_COVID19_SARS_COV_2_INFECTION_CALU3_CELLS_UP	2.07874e-30	5.6505e-28	-0.534515	-2.91435	BLANCO_MELO_BETA_INTERFERON_TREATED_BRONCHIAL_EPITHELIAL_CELLS_UP	1.7219e-25	4.96444e-23	-0.532691	-2.56453	BENPORATH_PROLIFERATION	9.93804e-25	4.17036e-22	0.623426	3.12833	BILANGES_SERUM_AND_RAPAMYCIN_SENSITIVE_GENES	5.70083e-42	2.16394e-39	-0.883841	-3.56645
BLANCO_MELO_RESPIRATORY_SYNCYTIAL_VIRUS_INFECTION_A594_CELLS_UP	5.22203e-22	8.32103e-20	-0.498418	-2.66665	BLANCO_MELO_COVID19_SARS_COV_2_INFECTION_A594_ACE2_EXPRESSING_CELLS_UP	1.303e-27	5.35804e-25	-0.498942	-2.4639	BORCZUK_MALIGNANT_MESOTHELIOMA_UP	8.76553e-24	2.89012e-21	0.487017	2.68188	CHNG_MULTIPLE_MYELOMA_HYPERPLOID_UP	6.54019e-24	1.10335e-21	-0.828138	-3.15685
CARRILLOREIXACH_MRS3_VS_LOWER_RISK_HEPATOBLASTOMA_DN	5.83658e-31	2.07468e-28	-0.64572	-3.20618	BLANCO_MELO_COVID19_SARS_COV_2_INFECTION_CALU3_CELLS_UP	6.00974e-38	1.38615e-34	-0.619127	-2.94116	BOYAULT_LIVER_CANCER_SUBCLASS_G3_UP	1.80034e-21	3.77745e-19	0.551858	2.83502	DACOSTA_UV_RESPONSE_VIA_ERCC3_COMMON_DN	1.47036e-33	3.52498e-31	0.505239	2.83146
CREIGHTON_ENDOCRINE_THERAPY_RESISTANCE_2	1.82884e-28	4.44794e-26	-0.466405	-2.61132	BLANCO_MELO_HUMAN_PARAINFLUENZA_VIRUS_3_INFECTION_A594_CELLS_UP	4.51331e-39	2.08199e-35	-0.710671	-3.24194	GRADE_COLON_AND_RECTAL_CANCER_UP	2.29402e-20	4.41216e-18	0.472242	2.56787	DAZARD_RESPONSE_TO_UV_NHEK_DN	1.66631e-26	3.45002e-24	0.539793	2.89707
IBRAHIM_NRF1_UP	3.15015e-30	8.08714e-28	0.502796	2.66899	BLANCO_MELO_RESPIRATORY_SYNCYTIAL_VIRUS_INFECTION_A594_CELLS_UP	9.82712e-26	3.23804e-23	-0.577604	-2.68975	HORIUCHI_WTAP_TARGETS_DN	1.34675e-23	3.65683e-21	0.476276	2.63024	HSIAO_HOUSEKEEPING_GENES	4.59669e-38	1.49557e-35	-0.549674	-2.86228
LIM_MAMMARY_STEM_CELL_UP	3.83171e-34	1.60967e-31	-0.486158	-2.73348	BOSCO_INTERFERON_INDUCED_ANTIVIRAL_MODULE	5.01012e-24	1.10056e-21	-0.798497	-3.09866	IBRAHIM_NRF1_UP	7.33527e-47	3.38596e-43	0.553026	3.12604	KEGG_RIBOSOME	1.97473e-57	2.43365e-54	-0.902528	-3.76653
LINDGREN_BLADDER_CANCER_CLUSTER_2B	9.07324e-40	6.98791e-37	-0.540865	-2.98865	BROWNE_INTERFERON_RESPONSIVE_GENES	4.55385e-24	1.05034e-21	-0.815985	-3.11089	KOBAYASHI_EGFR_SIGNALING_24HR_DN	4.116e-20	7.59977e-18	0.492729	2.64148	LI_DCP2_BOUND_MRNA	8.59888e-22	1.3056e-19	-0.707914	-2.98097
LIU_PROSTATE_CANCER_DN	3.06669e-26	7.08558e-24	-0.445405	-2.51232	CREIGHTON_ENDOCRINE_THERAPY_RESISTANCE_5	3.10836e-27	1.10299e-24	-0.502696	-2.47555	LIM_MAMMARY_STEM_CELL_UP	9.74043e-22	2.14104e-19	-0.450376	-2.273	MOOTHA_HUMAN_MITODB_6_2002	1.03066e-27	2.23556e-25	-0.494102	-2.58186
MANALO_HYPOXIA_DN	9.23764e-36	5.33589e-33	0.586847	2.99361	DUTERTRE_ESTRADIOL_RESPONSE_24HR_DN	3.38164e-22	5.7776e-20	-0.465597	-2.3041	LINDGREN_BLADDER_CANCER_CLUSTER_3_UP	6.15262e-24	2.18465e-21	0.474659	2.62122	MOOTHA_MITOCHONDRIA	8.21941e-28	1.87197e-25	-0.485698	-2.54528
MCLACHLAN_DENTAL_CARIES_UP	1.65535e-24	3.32582e-22	-0.524953	-2.79597	FOURNIER_ACINAR_DEVELOPMENT_LATE_2	2.42064e-22	4.29477e-20	0.586978	2.68111	LIU_PROSTATE_CANCER_DN	1.643e-20	3.29743e-18	-0.44223	-2.23451	PECE_MAMMARY_STEM_CELL_UP	1.83833e-35	4.92564e-33	-0.718788	-3.26848
MOOTHA_HUMAN_MITODB_6_2002	2.34091e-49	3.60578e-46	0.588227	3.11454	FULCHER_INFLAMMATORY_RESPONSE_LECTIN_VS_LPS_DN	1.39381e-27	5.35804e-25	-0.526252	-2.56244	MANALO_HYPOXIA_DN	3.51465e-32	5.40787e-29	0.546805	2.97012	REACTOME_ACTIVATION_OF_THE_MRNA_UPON_BINDING_OF_THE_CAP_BINDING_COMPLEX_AND_EIFS_AND_SUBSEQUENT_BINDING_TO_43S	1.92509e-24	3.37262e-22	-0.810644	-3.14075
MOOTHA_MITOCHONDRIA	6.66373e-51	1.53966e-47	0.581453	3.09766	GABRIELY_MIR21_TARGETS	2.16552e-22	3.99581e-20	-0.550488	-2.56736	OISHI_CHOLANGIOMA_STEM_CELL_LIKE_UP	2.46723e-19	4.21805e-17	0.434736	2.4221	REACTOME_CELLULAR_RESPONSE_TO_STARVATION	7.95894e-39	2.78869e-36	-0.717887	-3.32263
MOOTHA_PGC	3.3259e-26	7.31856e-24	0.484615	2.5604	GRADE_COLON_AND_RECTAL_CANCER_UP	6.81469e-24	1.42892e-21	0.591506	2.7037	REACTOME_CELL_CYCLE_CHECKPOINTS	7.79064e-25	3.59616e-22	0.516876	2.79582	REACTOME_EUKARYOTIC_TRANSLATION_ELONGATION	1.62555e-62	3.70218e-59	-0.901266	-3.81305
MUELLER_PLURINET	2.69398e-24	5.18703e-22	0.526525	2.68286	IBRAHIM_NRF1_UP	2.45394e-29	1.25778e-26	0.56147	2.64414	REACTOME_CELLULAR_RESPONSE_TO_CHEMICAL_STRESS	1.74217e-23	4.4677e-21	0.566043	2.90189	REACTOME_EUKARYOTIC_TRANSLATION_INITIATION	2.83203e-56	2.57998e-53	-0.843155	-3.74656
REACTOME_CELL_CYCLE_CHECKPOINTS	1.89099e-23	3.4953e-21	0.526867	2.67076	KOBAYASHI_EGFR_SIGNALING_24HR_DN	5.45968e-22	8.99482e-20	0.595644	2.67984	REACTOME_EXTRACELLULAR_MATRIX_ORGANIZATION	3.86561e-25	1.98263e-22	-0.544062	-2.62297	REACTOME_INFLUENZA_INFECTION	6.28355e-35	1.59009e-32	-0.695434	-3.23323
REACTOME_EXTRACELLULAR_MATRIX_ORGANIZATION	1.87205e-22	3.20398e-20	-0.500566	-2.68649	MANALO_HYPOXIA_DN	1.89946e-33	1.75245e-30	0.64796	2.96059	REACTOME_KEAP1_NFE2L2_PATHWAY	2.82494e-24	1.08666e-21	0.687934	3.25213	REACTOME_METABOLISM_OF_AMINO_ACIDS_AND_DERIVATIVES	1.61806e-35	4.60641e-33	-0.560487	-2.87295
REACTOME_IMMUNOREGULATORY_INTERACTIONS_BETWEEN_A_LYMPHOID_AND_A_NON_LYMPHOID_CELL	4.11914e-23	7.32097e-21	-0.589384	-2.95162	MOOTHA_HUMAN_MITODB_6_2002	8.41626e-22	1.33877e-19	0.520397	2.45059	REACTOME_M_PHASE	1.40455e-25	9.26197e-23	0.462198	2.61281	REACTOME_MITOCHONDRIAL_TRANSLATION	2.45236e-23	3.98947e-21	-0.704985	-3.02563
REACTOME_METABOLISM_OF_AMINO_ACIDS_AND_DERIVATIVES	9.40862e-31	2.71733e-28	0.532502	2.76094	MOSERLE_IFNA_RESPONSE	3.2582e-25	8.84121e-23	-0.944866	-3.07009	REACTOME_MITOTIC_METAPHASE_AND_ANAPHASE	1.25419e-23	3.65683e-21	0.536702	2.85484	REACTOME_NONSENSE_MEDIATED_DECAY_NMD	1.0722e-48	6.10483e-46	-0.820389	-3.60788
REACTOME_RRNA_PROCESSING	6.63575e-31	2.19027e-28	0.626801	3.07512	REACTOME_CELLULAR_RESPONSE_TO_CHEMICAL_STRESS	7.9291e-29	3.65769e-26	0.686835	2.98771	REACTOME_NUCLEAR_EVENTS_MEDIATED_BY_NFE2L2	4.95544e-23	1.20391e-20	0.745889	3.35096	REACTOME_REGULATION_OF_EXPRESSION_OF_SLITS_AND_ROBOS	1.56827e-48	7.93721e-46	-0.743569	-3.49394
REACTOME_THE_CITRIC_ACID_TCA_CYCLE_AND_RESPIRATORY_ELECTRON_TRANSPORT	2.75708e-22	4.55016e-20	0.594692	2.86594	REACTOME_KEAP1_NFE2L2_PATHWAY	8.94884e-25	2.17269e-22	0.767531	3.03614	REACTOME_SEPARATION_OF_SISTER_CHROMATIDS	2.7738e-19	4.57281e-17	0.538485	2.76767	REACTOME_RESPONSE_OF_EIF2AK4_GCN2_TO_AMINO_ACID_DEFICIENCY	1.30804e-51	8.5116e-49	-0.852974	-3.67671
REACTOME_TRANSLATION	1.18017e-42	1.09071e-39	0.618149	3.15888	REACTOME_NUCLEAR_EVENTS_MEDIATED_BY_NFE2L2	2.4524e-23	4.71371e-21	0.810191	3.02812	REACTOME_SYNTHESIS_OF_DNA	5.14365e-20	9.13195e-18	0.625351	3.00669	REACTOME_RRNA_PROCESSING	2.19107e-47	9.98031e-45	-0.70888	-3.40477
RODWELL_AGING_KIDNEY_UP	4.8006e-34	1.84863e-31	-0.477603	-2.69699	REACTOME_RRNA_PROCESSING	5.53462e-31	3.1914e-28	0.688805	3.01029	ROSTY_CERVICAL_CANCER_PROLIFERATION_CLUSTER	1.47514e-18	2.26975e-16	0.579928	2.88797	REACTOME_SARS_COV_1_MODULATES_HOST_TRANSLATION_MACHINERY	1.01736e-25	2.01482e-23	-0.906266	-3.15488
SCHUETZ_BREAST_CANCER_DUCTAL_INVASIVE_UP	1.89043e-55	8.73569e-52	-0.618078	-3.40073	REACTOME_TRANSLATION	7.77516e-36	1.19556e-32	0.655386	2.99789	SCHLOSSER_MYC_TARGETS_REPRESSED_BY_SERUM	3.09511e-22	7.1435e-20	0.594029	2.9824	REACTOME_SELENOAMINO_ACID_METABOLISM	4.30423e-43	1.78234e-40	-0.79547	-3.50381
SHEDDEN_LUNG_CANCER_POOR_SURVIVAL_A6	8.33567e-31	2.56794e-28	0.495801	2.64692	SHEDDEN_LUNG_CANCER_POOR_SURVIVAL_A6	5.49783e-31	3.1914e-28	0.5619	2.66789	SHEDDEN_LUNG_CANCER_POOR_SURVIVAL_A6	3.23712e-29	3.73563e-26	0.461543	2.63142	REACTOME_SIGNALING_BY_ROBO_RECEPTORS	8.99547e-36	2.73163e-33	-0.643342	-3.10718
SMID_BREAST_CANCER_NORMAL_LIKE_UP	2.22731e-47	2.57309e-44	-0.54112	-3.05637	TAKEDA_TARGETS_OF_NUP98_HOXA9_FUSION_10D_UP	1.05891e-23	2.1238e-21	-0.65514	-2.88445	SMID_BREAST_CANCER_NORMAL_LIKE_UP	4.66721e-33	1.07719e-29	-0.504715	-2.54731	REACTOME_SRP_DEPENDENT_COTRANSLATIONAL_PROTEIN_TARGETING_TO_MEMBRANE	6.07461e-52	4.61164e-49	-0.840349	-3.69502
STEIN_ESRRA_TARGETS_UP	7.26132e-25	1.52521e-22	0.486147	2.55828	TAKEDA_TARGETS_OF_NUP98_HOXA9_FUSION_3D_UP	3.98484e-31	3.06368e-28	-0.70339	-3.10484	SOTIRIOU_BREAST_CANCER_GRADE_1_VS_3_UP	2.30559e-25	1.33032e-22	0.627778	3.16675	REACTOME_TRANSLATION	7.11713e-67	3.24185e-63	-0.702644	-3.54613
WALLACE_PROSTATE_CANCER_RACE_UP	4.30158e-35	1.98776e-32	-0.565383	-3.06188	TARTE_PLASMA_CELL_VS_PLASMABLAST_DN	2.02365e-21	3.11169e-19	0.561732	2.56423	WEST_ADRENOCORTICAL_TUMOR_UP	3.58525e-26	3.30991e-23	0.507056	2.77365	WONG_MITOCHONDRIA_GENE_MODULE	4.24726e-25	7.7385e-23	-0.577867	-2.79532
WONG_EMBRYONIC_STEM_CELL_CORE	1.11432e-35	5.72143e-33	0.564545	2.92468	WONG_EMBRYONIC_STEM_CELL_CORE	8.70052e-34	1.00339e-30	0.623002	2.87715	WINNEPENNINCKX_MELANOMA_METASTASIS_UP	1.32703e-23	3.65683e-21	0.603279	3.03577	WP_CYTOPLASMIC_RIBOSOMAL_PROTEINS	2.13712e-57	2.43365e-54	-0.899389	-3.76754
WONG_MITOCHONDRIA_GENE_MODULE	1.26453e-38	8.34769e-36	0.655855	3.24046	WP_NRF2_PATHWAY	1.5552e-25	4.78274e-23	0.744867	3.01865	WONG_EMBRYONIC_STEM_CELL_CORE	1.31617e-25	9.26197e-23	0.486261	2.70481	WP_NRF2_PATHWAY	3.79919e-25	7.21055e-23	0.705558	3.30098
YAO_TEMPORAL_RESPONSE_TO_PROGESTERONE_CLUSTER_13	6.83875e-22	1.05339e-19	0.586655	2.82644	XIE_ST_HSC_S1PR3_OE_UP	6.93631e-25	1.77762e-22	-0.664864	-2.93065	ZHANG_BREAST_CANCER_PROGENITORS_UP	6.33836e-19	1.00889e-16	0.399508	2.27125	WP_NUCLEAR_RECEPTORS_METAPATHWAY	1.07419e-22	1.68721e-20	0.539115	2.85097
88. REACTOME_KEAP1_NFE2L2_PATHWAY	2.46541e-15	1.3095e-13	0.616192	2.74563	376. SMID_BREAST_CANCER_NORMAL_LIKE_UP	8.9299e-07	1.0985e-05	-0.352068	-1.69165	41. MOOTHA_HUMAN_MITODB_6_2002	5.61742e-17	6.4825e-15	0.387464	2.20138	43. IBRAHIM_NRF1_UP	1.31853e-17	1.42998e-15	0.423372	2.36011
															642. MANALO_HYPOXIA_UP	0.00067356	0.00478637	0.32427	1.64946
															371. REACTOME_KEAP1_NFE2L2_PATHWAY	2.72667e-05	0.000335079	0.445303	2.05451
All the same															60. WONG_EMBRYONIC_STEM_CELL_CORE	2.47518e-14	1.91092e-12	-0.433386	-2.21419
H596- different															212. SHEDDEN_LUNG_CANCER_GOOD_SURVIVAL_A4	0.00504223	0.0232171	0.305703	1.52851
															212. SMID_BREAST_CANCER_NORMAL_LIKE_UP	4.81588e-07	1.03964e-05	0.338107	1.8453
